# Supplementary material
Source: publisher figshare collection journal article supplement (https://gsapubs.figshare.com/ndownloader/files/31330147)
Supplement: Supplementary file 1 [file 31330147]

## Sheet: Sheet1
Case_Name	Age	Eolian_Architectural_Element_Type	Non_Eolian_Architectural_Element_Type	Thickness_m	Subsidence_Group	Icehouse_Greenhouse	Palaeosupercontinent_Setting
Escorihuela Formation/Pliocene and Pleistocene deposits of Teruel Basin	Cenozoic	\N	alluvial_conglomerate	3	slow_subsidence	icehouse	none
Escorihuela Formation/Pliocene and Pleistocene deposits of Teruel Basin	Cenozoic	\N	alluvial_conglomerate	0.8	slow_subsidence	icehouse	none
Escorihuela Formation/Pliocene and Pleistocene deposits of Teruel Basin	Cenozoic	\N	alluvial_conglomerate	0.8	slow_subsidence	icehouse	none
Escorihuela Formation/Pliocene and Pleistocene deposits of Teruel Basin	Cenozoic	\N	alluvial_conglomerate	0.5	slow_subsidence	icehouse	none
Escorihuela Formation/Pliocene and Pleistocene deposits of Teruel Basin	Cenozoic	\N	alluvial_conglomerate	0.5	slow_subsidence	icehouse	none
Escorihuela Formation/Pliocene and Pleistocene deposits of Teruel Basin	Cenozoic	\N	alluvial_conglomerate,alluvial_sandstone_or_siltstone	3.5	slow_subsidence	icehouse	none
Escorihuela Formation/Pliocene and Pleistocene deposits of Teruel Basin	Cenozoic	\N	alluvial_conglomerate,alluvial_sandstone_or_siltstone	1.2	slow_subsidence	icehouse	none
Escorihuela Formation/Pliocene and Pleistocene deposits of Teruel Basin	Cenozoic	\N	alluvial_sandstone_or_siltstone	0.2	slow_subsidence	icehouse	none
Escorihuela Formation/Pliocene and Pleistocene deposits of Teruel Basin	Cenozoic	\N	alluvial_sandstone_or_siltstone	0.1	slow_subsidence	icehouse	none
Escorihuela Formation/Pliocene and Pleistocene deposits of Teruel Basin	Cenozoic	\N	alluvial_sandstone_or_siltstone	0.3	slow_subsidence	icehouse	none
Arikaree Group	Cenozoic	\N	non-channelized_fluvial_deposits	3	slow_subsidence	icehouse	none
Arikaree Group	Cenozoic	\N	non-channelized_fluvial_deposits	4	slow_subsidence	icehouse	none
Arikaree Group	Cenozoic	\N	non-channelized_fluvial_deposits	4	slow_subsidence	icehouse	none
Arikaree Group	Cenozoic	\N	non-channelized_fluvial_deposits	20	slow_subsidence	icehouse	none
Escorihuela Formation/Pliocene and Pleistocene deposits of Teruel Basin	Cenozoic	interdune_damp	\N	0.2	slow_subsidence	icehouse	none
Escorihuela Formation/Pliocene and Pleistocene deposits of Teruel Basin	Cenozoic	interdune_damp	\N	0.1	slow_subsidence	icehouse	none
Escorihuela Formation/Pliocene and Pleistocene deposits of Teruel Basin	Cenozoic	interdune_damp	\N	0.15	slow_subsidence	icehouse	none
Escorihuela Formation/Pliocene and Pleistocene deposits of Teruel Basin	Cenozoic	interdune_damp	\N	0.15	slow_subsidence	icehouse	none
Escorihuela Formation/Pliocene and Pleistocene deposits of Teruel Basin	Cenozoic	interdune_damp	\N	0.15	slow_subsidence	icehouse	none
Escorihuela Formation/Pliocene and Pleistocene deposits of Teruel Basin	Cenozoic	interdune_damp	\N	0.1	slow_subsidence	icehouse	none
Escorihuela Formation/Pliocene and Pleistocene deposits of Teruel Basin	Cenozoic	interdune_damp	\N	0.15	slow_subsidence	icehouse	none
Escorihuela Formation/Pliocene and Pleistocene deposits of Teruel Basin	Cenozoic	interdune_damp	\N	0.05	slow_subsidence	icehouse	none
Escorihuela Formation/Pliocene and Pleistocene deposits of Teruel Basin	Cenozoic	interdune_damp	\N	0.1	slow_subsidence	icehouse	none
Escorihuela Formation/Pliocene and Pleistocene deposits of Teruel Basin	Cenozoic	interdune_damp	\N	0.15	slow_subsidence	icehouse	none
Escorihuela Formation/Pliocene and Pleistocene deposits of Teruel Basin	Cenozoic	interdune_damp	\N	0.075	slow_subsidence	icehouse	none
Escorihuela Formation/Pliocene and Pleistocene deposits of Teruel Basin	Cenozoic	interdune_damp	\N	0.075	slow_subsidence	icehouse	none
Escorihuela Formation/Pliocene and Pleistocene deposits of Teruel Basin	Cenozoic	interdune_damp	\N	0.05	slow_subsidence	icehouse	none
Escorihuela Formation/Pliocene and Pleistocene deposits of Teruel Basin	Cenozoic	interdune_damp	\N	0.05	slow_subsidence	icehouse	none
Escorihuela Formation/Pliocene and Pleistocene deposits of Teruel Basin	Cenozoic	interdune_damp	\N	0.05	slow_subsidence	icehouse	none
Escorihuela Formation/Pliocene and Pleistocene deposits of Teruel Basin	Cenozoic	interdune_damp	\N	0.05	slow_subsidence	icehouse	none
Escorihuela Formation/Pliocene and Pleistocene deposits of Teruel Basin	Cenozoic	interdune_damp	\N	0.05	slow_subsidence	icehouse	none
Escorihuela Formation/Pliocene and Pleistocene deposits of Teruel Basin	Cenozoic	interdune_damp	\N	0.05	slow_subsidence	icehouse	none
Escorihuela Formation/Pliocene and Pleistocene deposits of Teruel Basin	Cenozoic	interdune_wet	\N	0.1	slow_subsidence	icehouse	none
Escorihuela Formation/Pliocene and Pleistocene deposits of Teruel Basin	Cenozoic	interdune_wet	\N	0.1	slow_subsidence	icehouse	none
Escorihuela Formation/Pliocene and Pleistocene deposits of Teruel Basin	Cenozoic	interdune_wet	\N	0.15	slow_subsidence	icehouse	none
Escorihuela Formation/Pliocene and Pleistocene deposits of Teruel Basin	Cenozoic	interdune_wet	\N	0.05	slow_subsidence	icehouse	none
Escorihuela Formation/Pliocene and Pleistocene deposits of Teruel Basin	Cenozoic	interdune_wet	\N	0.05	slow_subsidence	icehouse	none
Escorihuela Formation/Pliocene and Pleistocene deposits of Teruel Basin	Cenozoic	sandsheet_undifferentiated	\N	0.2	slow_subsidence	icehouse	none
Escorihuela Formation/Pliocene and Pleistocene deposits of Teruel Basin	Cenozoic	sandsheet_undifferentiated	\N	0.4	slow_subsidence	icehouse	none
Escorihuela Formation/Pliocene and Pleistocene deposits of Teruel Basin	Cenozoic	sandsheet_undifferentiated	\N	0.1	slow_subsidence	icehouse	none
Escorihuela Formation/Pliocene and Pleistocene deposits of Teruel Basin	Cenozoic	sandsheet_undifferentiated	\N	0.15	slow_subsidence	icehouse	none
Escorihuela Formation/Pliocene and Pleistocene deposits of Teruel Basin	Cenozoic	sandsheet_undifferentiated	\N	0.1	slow_subsidence	icehouse	none
Escorihuela Formation/Pliocene and Pleistocene deposits of Teruel Basin	Cenozoic	sandsheet_undifferentiated	\N	0.1	slow_subsidence	icehouse	none
Escorihuela Formation/Pliocene and Pleistocene deposits of Teruel Basin	Cenozoic	sandsheet_undifferentiated	\N	0.2	slow_subsidence	icehouse	none
Escorihuela Formation/Pliocene and Pleistocene deposits of Teruel Basin	Cenozoic	sandsheet_undifferentiated	\N	0.15	slow_subsidence	icehouse	none
Escorihuela Formation/Pliocene and Pleistocene deposits of Teruel Basin	Cenozoic	sandsheet_undifferentiated	\N	0.1	slow_subsidence	icehouse	none
Escorihuela Formation/Pliocene and Pleistocene deposits of Teruel Basin	Cenozoic	sandsheet_undifferentiated	\N	0.05	slow_subsidence	icehouse	none
Escorihuela Formation/Pliocene and Pleistocene deposits of Teruel Basin	Cenozoic	sandsheet_undifferentiated	\N	0.15	slow_subsidence	icehouse	none
Escorihuela Formation/Pliocene and Pleistocene deposits of Teruel Basin	Cenozoic	sandsheet_undifferentiated	\N	0.15	slow_subsidence	icehouse	none
Escorihuela Formation/Pliocene and Pleistocene deposits of Teruel Basin	Cenozoic	sandsheet_undifferentiated	\N	0.1	slow_subsidence	icehouse	none
Escorihuela Formation/Pliocene and Pleistocene deposits of Teruel Basin	Cenozoic	sandsheet_undifferentiated	\N	0.1	slow_subsidence	icehouse	none
Escorihuela Formation/Pliocene and Pleistocene deposits of Teruel Basin	Cenozoic	sandsheet_undifferentiated	\N	0.15	slow_subsidence	icehouse	none
Escorihuela Formation/Pliocene and Pleistocene deposits of Teruel Basin	Cenozoic	sandsheet_undifferentiated	\N	0.15	slow_subsidence	icehouse	none
Escorihuela Formation/Pliocene and Pleistocene deposits of Teruel Basin	Cenozoic	sandsheet_undifferentiated	\N	0.15	slow_subsidence	icehouse	none
Escorihuela Formation/Pliocene and Pleistocene deposits of Teruel Basin	Cenozoic	sandsheet_undifferentiated	\N	0.1	slow_subsidence	icehouse	none
Escorihuela Formation/Pliocene and Pleistocene deposits of Teruel Basin	Cenozoic	sandsheet_undifferentiated	\N	0.025	slow_subsidence	icehouse	none
Escorihuela Formation/Pliocene and Pleistocene deposits of Teruel Basin	Cenozoic	sandsheet_undifferentiated	\N	0.025	slow_subsidence	icehouse	none
Escorihuela Formation/Pliocene and Pleistocene deposits of Teruel Basin	Cenozoic	sandsheet_undifferentiated	\N	0.1	slow_subsidence	icehouse	none
Escorihuela Formation/Pliocene and Pleistocene deposits of Teruel Basin	Cenozoic	sandsheet_undifferentiated	\N	0.1	slow_subsidence	icehouse	none
Escorihuela Formation/Pliocene and Pleistocene deposits of Teruel Basin	Cenozoic	sandsheet_undifferentiated	\N	0.05	slow_subsidence	icehouse	none
Escorihuela Formation/Pliocene and Pleistocene deposits of Teruel Basin	Cenozoic	sandsheet_undifferentiated	\N	0.05	slow_subsidence	icehouse	none
Escorihuela Formation/Pliocene and Pleistocene deposits of Teruel Basin	Cenozoic	sandsheet_undifferentiated	\N	0.05	slow_subsidence	icehouse	none
Escorihuela Formation/Pliocene and Pleistocene deposits of Teruel Basin	Cenozoic	sandsheet_undifferentiated	\N	0.05	slow_subsidence	icehouse	none
Escorihuela Formation/Pliocene and Pleistocene deposits of Teruel Basin	Cenozoic	sandsheet_undifferentiated	\N	0.05	slow_subsidence	icehouse	none
Escorihuela Formation/Pliocene and Pleistocene deposits of Teruel Basin	Cenozoic	sandsheet_undifferentiated	\N	0.05	slow_subsidence	icehouse	none
Escorihuela Formation/Pliocene and Pleistocene deposits of Teruel Basin	Cenozoic	sandsheet_undifferentiated	\N	0.1	slow_subsidence	icehouse	none
Escorihuela Formation/Pliocene and Pleistocene deposits of Teruel Basin	Cenozoic	sandsheet_undifferentiated	\N	0.1	slow_subsidence	icehouse	none
Escorihuela Formation/Pliocene and Pleistocene deposits of Teruel Basin	Cenozoic	sandsheet_undifferentiated	\N	0.05	slow_subsidence	icehouse	none
Escorihuela Formation/Pliocene and Pleistocene deposits of Teruel Basin	Cenozoic	sandsheet_undifferentiated	\N	0.1	slow_subsidence	icehouse	none
Escorihuela Formation/Pliocene and Pleistocene deposits of Teruel Basin	Cenozoic	set	\N	0.7	slow_subsidence	icehouse	none
Escorihuela Formation/Pliocene and Pleistocene deposits of Teruel Basin	Cenozoic	set	\N	0.35	slow_subsidence	icehouse	none
Escorihuela Formation/Pliocene and Pleistocene deposits of Teruel Basin	Cenozoic	set	\N	1	slow_subsidence	icehouse	none
Escorihuela Formation/Pliocene and Pleistocene deposits of Teruel Basin	Cenozoic	set	\N	0.8	slow_subsidence	icehouse	none
Escorihuela Formation/Pliocene and Pleistocene deposits of Teruel Basin	Cenozoic	set	\N	0.3	slow_subsidence	icehouse	none
Escorihuela Formation/Pliocene and Pleistocene deposits of Teruel Basin	Cenozoic	set	\N	0.3	slow_subsidence	icehouse	none
Escorihuela Formation/Pliocene and Pleistocene deposits of Teruel Basin	Cenozoic	set	\N	0.5	slow_subsidence	icehouse	none
Arikaree Group	Cenozoic	set	\N	1	slow_subsidence	icehouse	none
Arikaree Group	Cenozoic	set	\N	2	slow_subsidence	icehouse	none
Arikaree Group	Cenozoic	set	\N	1.5	slow_subsidence	icehouse	none
Arikaree Group	Cenozoic	set	\N	2	slow_subsidence	icehouse	none
Arikaree Group	Cenozoic	set	\N	2	slow_subsidence	icehouse	none
Arikaree Group	Cenozoic	set	\N	2	slow_subsidence	icehouse	none
Arikaree Group	Cenozoic	set	\N	3	slow_subsidence	icehouse	none
Arikaree Group	Cenozoic	set	\N	3	slow_subsidence	icehouse	none
Arikaree Group	Cenozoic	set	\N	2.5	slow_subsidence	icehouse	none
Arikaree Group	Cenozoic	set	\N	4	slow_subsidence	icehouse	none
Arikaree Group	Cenozoic	set	\N	4	slow_subsidence	icehouse	none
Arikaree Group	Cenozoic	set	\N	3	slow_subsidence	icehouse	none
Arikaree Group	Cenozoic	set	\N	2.5	slow_subsidence	icehouse	none
Arikaree Group	Cenozoic	set	\N	2.5	slow_subsidence	icehouse	none
Arikaree Group	Cenozoic	set	\N	3	slow_subsidence	icehouse	none
Arikaree Group	Cenozoic	set	\N	2	slow_subsidence	icehouse	none
Arikaree Group	Cenozoic	set	\N	2	slow_subsidence	icehouse	none
Arikaree Group	Cenozoic	set	\N	3	slow_subsidence	icehouse	none
Arikaree Group	Cenozoic	set	\N	3	slow_subsidence	icehouse	none
Arikaree Group	Cenozoic	set	\N	2	slow_subsidence	icehouse	none
Arikaree Group	Cenozoic	set	\N	2.5	slow_subsidence	icehouse	none
Arikaree Group	Cenozoic	set	\N	2.5	slow_subsidence	icehouse	none
Arikaree Group	Cenozoic	set	\N	2.5	slow_subsidence	icehouse	none
Arikaree Group	Cenozoic	set	\N	2.5	slow_subsidence	icehouse	none
Arikaree Group	Cenozoic	set	\N	2.5	slow_subsidence	icehouse	none
Arikaree Group	Cenozoic	set	\N	2	slow_subsidence	icehouse	none
Arikaree Group	Cenozoic	set	\N	2	slow_subsidence	icehouse	none
Arikaree Group	Cenozoic	set	\N	2	slow_subsidence	icehouse	none
Arikaree Group	Cenozoic	set	\N	2	slow_subsidence	icehouse	none
Boxtel Formation (Weichselian Periglacial Deposits)	Cenozoic	\N	fluvial_channel,fluvial_sandstone	1.5	moderate_subsidence	icehouse	none
Boxtel Formation (Weichselian Periglacial Deposits)	Cenozoic	\N	fluvial_channel,fluvial_sandstone	1	moderate_subsidence	icehouse	none
Boxtel Formation (Weichselian Periglacial Deposits)	Cenozoic	\N	fluvial_mudstone,non-channelized_fluvial_deposits	0.5	moderate_subsidence	icehouse	none
Boxtel Formation (Weichselian Periglacial Deposits)	Cenozoic	\N	fluvial_mudstone,non-channelized_fluvial_deposits	3	moderate_subsidence	icehouse	none
Boxtel Formation (Weichselian Periglacial Deposits)	Cenozoic	\N	fluvial_mudstone,non-channelized_fluvial_deposits	1.5	moderate_subsidence	icehouse	none
Boxtel Formation (Weichselian Periglacial Deposits)	Cenozoic	\N	fluvial_mudstone,non-channelized_fluvial_deposits	1	moderate_subsidence	icehouse	none
Boxtel Formation (Weichselian Periglacial Deposits)	Cenozoic	\N	fluvial_mudstone,non-channelized_fluvial_deposits	0.25	moderate_subsidence	icehouse	none
Boxtel Formation (Weichselian Periglacial Deposits)	Cenozoic	\N	fluvial_mudstone,non-channelized_fluvial_deposits	0.5	moderate_subsidence	icehouse	none
Boxtel Formation (Weichselian Periglacial Deposits)	Cenozoic	\N	fluvial_mudstone,non-channelized_fluvial_deposits	1.8	moderate_subsidence	icehouse	none
Boxtel Formation (Weichselian Periglacial Deposits)	Cenozoic	\N	peat	1	moderate_subsidence	icehouse	none
Boxtel Formation (Weichselian Periglacial Deposits)	Cenozoic	\N	peat	0.1	moderate_subsidence	icehouse	none
Boxtel Formation (Weichselian Periglacial Deposits)	Cenozoic	\N	peat	0.1	moderate_subsidence	icehouse	none
Boxtel Formation (Weichselian Periglacial Deposits)	Cenozoic	\N	peat	0.1	moderate_subsidence	icehouse	none
Boxtel Formation (Weichselian Periglacial Deposits)	Cenozoic	\N	peat	0.9	moderate_subsidence	icehouse	none
Quaternary Perth Basin/Tamala Limestone	Cenozoic	\N	paleosol	2	moderate_subsidence	icehouse	none
Rio Negro Formation	Cenozoic	\N	paleosol	2	moderate_subsidence	icehouse	none
Tsondab Formation	Cenozoic	\N	\N	50	moderate_subsidence	icehouse	none
Tsondab Formation	Cenozoic	\N	\N	50	moderate_subsidence	icehouse	none
Tsondab Formation	Cenozoic	\N	igneous	38	moderate_subsidence	icehouse	none
Tsondab Formation	Cenozoic	\N	igneous	6	moderate_subsidence	icehouse	none
Sables de Fontainebleau Formation	Cenozoic	\N	marine_carbonates	0.75	moderate_subsidence	icehouse	none
Sables de Fontainebleau Formation	Cenozoic	\N	marine_siliciclastics	3	moderate_subsidence	icehouse	none
Sables de Fontainebleau Formation	Cenozoic	\N	paleosol	9	moderate_subsidence	icehouse	none
Sables de Fontainebleau Formation	Cenozoic	compound_set	\N	5	moderate_subsidence	icehouse	none
Sables de Fontainebleau Formation	Cenozoic	compound_set	\N	10	moderate_subsidence	icehouse	none
Quaternary Perth Basin/Tamala Limestone	Cenozoic	dune	\N	18	moderate_subsidence	icehouse	none
Rio Negro Formation	Cenozoic	homgenized_reworked_aeolian	\N	4.75	moderate_subsidence	icehouse	none
Rio Negro Formation	Cenozoic	interdune_dry	\N	2.5	moderate_subsidence	icehouse	none
Rio Negro Formation	Cenozoic	interdune_dry	\N	1.4	moderate_subsidence	icehouse	none
Rio Negro Formation	Cenozoic	interdune_dry	\N	2.75	moderate_subsidence	icehouse	none
Rio Negro Formation	Cenozoic	interdune_dry	\N	2	moderate_subsidence	icehouse	none
Rio Negro Formation	Cenozoic	interdune_dry	\N	1	moderate_subsidence	icehouse	none
Rio Negro Formation	Cenozoic	interdune_dry	\N	0.2	moderate_subsidence	icehouse	none
Rio Negro Formation	Cenozoic	interdune_wet	\N	0.1	moderate_subsidence	icehouse	none
Rio Negro Formation	Cenozoic	interdune_wet	\N	1.5	moderate_subsidence	icehouse	none
Rio Negro Formation	Cenozoic	interdune_wet	\N	1	moderate_subsidence	icehouse	none
Rio Negro Formation	Cenozoic	interdune_wet	\N	0.1	moderate_subsidence	icehouse	none
Sables de Fontainebleau Formation	Cenozoic	interdune_wet	\N	5	moderate_subsidence	icehouse	none
Sables de Fontainebleau Formation	Cenozoic	interdune_wet	\N	7.5	moderate_subsidence	icehouse	none
Boxtel Formation (Weichselian Periglacial Deposits)	Cenozoic	sandsheet_undifferentiated	\N	1	moderate_subsidence	icehouse	none
Boxtel Formation (Weichselian Periglacial Deposits)	Cenozoic	sandsheet_undifferentiated	\N	0.25	moderate_subsidence	icehouse	none
Boxtel Formation (Weichselian Periglacial Deposits)	Cenozoic	sandsheet_undifferentiated	\N	1.25	moderate_subsidence	icehouse	none
Boxtel Formation (Weichselian Periglacial Deposits)	Cenozoic	sandsheet_undifferentiated	\N	0.25	moderate_subsidence	icehouse	none
Boxtel Formation (Weichselian Periglacial Deposits)	Cenozoic	sandsheet_undifferentiated	\N	0.75	moderate_subsidence	icehouse	none
Boxtel Formation (Weichselian Periglacial Deposits)	Cenozoic	sandsheet_undifferentiated	\N	1.5	moderate_subsidence	icehouse	none
Boxtel Formation (Weichselian Periglacial Deposits)	Cenozoic	sandsheet_undifferentiated	\N	1.25	moderate_subsidence	icehouse	none
Boxtel Formation (Weichselian Periglacial Deposits)	Cenozoic	sandsheet_undifferentiated	\N	1.25	moderate_subsidence	icehouse	none
Boxtel Formation (Weichselian Periglacial Deposits)	Cenozoic	sandsheet_undifferentiated	\N	0.15	moderate_subsidence	icehouse	none
Boxtel Formation (Weichselian Periglacial Deposits)	Cenozoic	sandsheet_undifferentiated	\N	0.5	moderate_subsidence	icehouse	none
Boxtel Formation (Weichselian Periglacial Deposits)	Cenozoic	sandsheet_undifferentiated	\N	2.5	moderate_subsidence	icehouse	none
Boxtel Formation (Weichselian Periglacial Deposits)	Cenozoic	sandsheet_undifferentiated	\N	0.15	moderate_subsidence	icehouse	none
Boxtel Formation (Weichselian Periglacial Deposits)	Cenozoic	sandsheet_undifferentiated	\N	2	moderate_subsidence	icehouse	none
Boxtel Formation (Weichselian Periglacial Deposits)	Cenozoic	sandsheet_undifferentiated	\N	0.5	moderate_subsidence	icehouse	none
Boxtel Formation (Weichselian Periglacial Deposits)	Cenozoic	sandsheet_undifferentiated	\N	0.5	moderate_subsidence	icehouse	none
Boxtel Formation (Weichselian Periglacial Deposits)	Cenozoic	sandsheet_undifferentiated	\N	0.5	moderate_subsidence	icehouse	none
Boxtel Formation (Weichselian Periglacial Deposits)	Cenozoic	sandsheet_undifferentiated	\N	1	moderate_subsidence	icehouse	none
Quaternary Perth Basin/Tamala Limestone	Cenozoic	set	\N	12	moderate_subsidence	icehouse	none
Quaternary Perth Basin/Tamala Limestone	Cenozoic	set	\N	10	moderate_subsidence	icehouse	none
Quaternary Perth Basin/Tamala Limestone	Cenozoic	set	\N	4	moderate_subsidence	icehouse	none
Rio Negro Formation	Cenozoic	set	\N	2.25	moderate_subsidence	icehouse	none
Rio Negro Formation	Cenozoic	set	\N	1	moderate_subsidence	icehouse	none
Tsondab Formation	Cenozoic	set	\N	20	moderate_subsidence	icehouse	none
Tsondab Formation	Cenozoic	set	\N	20	moderate_subsidence	icehouse	none
Tsondab Formation	Cenozoic	set	\N	20	moderate_subsidence	icehouse	none
Tsondab Formation	Cenozoic	set	\N	20	moderate_subsidence	icehouse	none
Tsondab Formation	Cenozoic	set	\N	20	moderate_subsidence	icehouse	none
Tsondab Formation	Cenozoic	set	\N	20	moderate_subsidence	icehouse	none
Tsondab Formation	Cenozoic	set	\N	18	moderate_subsidence	icehouse	none
Tsondab Formation	Cenozoic	set	\N	22	moderate_subsidence	icehouse	none
Tsondab Formation	Cenozoic	set	\N	10	moderate_subsidence	icehouse	none
Tsondab Formation	Cenozoic	set	\N	4	moderate_subsidence	icehouse	none
Tsondab Formation	Cenozoic	set	\N	4	moderate_subsidence	icehouse	none
Tsondab Formation	Cenozoic	set	\N	3	moderate_subsidence	icehouse	none
Tsondab Formation	Cenozoic	set	\N	3	moderate_subsidence	icehouse	none
Tsondab Formation	Cenozoic	set	\N	3	moderate_subsidence	icehouse	none
Tsondab Formation	Cenozoic	set	\N	3	moderate_subsidence	icehouse	none
Tsondab Formation	Cenozoic	set	\N	5	moderate_subsidence	icehouse	none
Quaternary Perth Basin/Tamala Limestone	Cenozoic	undifferentiated_aeolian_strata	\N	30	moderate_subsidence	icehouse	none
Quaternary Perth Basin/Tamala Limestone	Cenozoic	undifferentiated_aeolian_strata	\N	38	moderate_subsidence	icehouse	none
Sables de Fontainebleau Formation	Cenozoic	undifferentiated_aeolian_strata,deformed_aeolian_strata	\N	5	moderate_subsidence	icehouse	none
Boxtel Formation (Weichselian Periglacial Deposits)	Cenozoic		lacustrine_siliciclastics	0.1	moderate_subsidence	icehouse	none
Boxtel Formation (Weichselian Periglacial Deposits)	Cenozoic		lacustrine_siliciclastics	0.1	moderate_subsidence	icehouse	none
Boxtel Formation (Weichselian Periglacial Deposits)	Cenozoic		lacustrine_siliciclastics	0.1	moderate_subsidence	icehouse	none
Boxtel Formation (Weichselian Periglacial Deposits)	Cenozoic		lacustrine_siliciclastics	0.1	moderate_subsidence	icehouse	none
Guara Formation	Mesozoic	\N	\N	1.7	slow_subsidence	greenhouse	west_gondwanaland
Guara Formation	Mesozoic	\N	fluvial_channel	2	slow_subsidence	greenhouse	west_gondwanaland
Guara Formation	Mesozoic	\N	fluvial_channel	1.7	slow_subsidence	greenhouse	west_gondwanaland
Guara Formation	Mesozoic	\N	fluvial_channel	2	slow_subsidence	greenhouse	west_gondwanaland
Guara Formation	Mesozoic	\N	fluvial_channel	5	slow_subsidence	greenhouse	west_gondwanaland
Guara Formation	Mesozoic	\N	fluvial_channel	4	slow_subsidence	greenhouse	west_gondwanaland
Guara Formation	Mesozoic	\N	fluvial_channel	1.3	slow_subsidence	greenhouse	west_gondwanaland
Guara Formation	Mesozoic	\N	fluvial_channel	1	slow_subsidence	greenhouse	west_gondwanaland
Guara Formation	Mesozoic	\N	fluvial_channel	0.5	slow_subsidence	greenhouse	west_gondwanaland
Guara Formation	Mesozoic	\N	fluvial_channel	0.6	slow_subsidence	greenhouse	west_gondwanaland
Guara Formation	Mesozoic	\N	fluvial_channel	0.5	slow_subsidence	greenhouse	west_gondwanaland
Guara Formation	Mesozoic	\N	fluvial_channel	0.5	slow_subsidence	greenhouse	west_gondwanaland
Guara Formation	Mesozoic	\N	fluvial_channel	0.5	slow_subsidence	greenhouse	west_gondwanaland
Guara Formation	Mesozoic	\N	fluvial_channel	0.5	slow_subsidence	greenhouse	west_gondwanaland
Guara Formation	Mesozoic	\N	fluvial_channel	0.6	slow_subsidence	greenhouse	west_gondwanaland
Guara Formation	Mesozoic	\N	non-channelized_fluvial_deposits	0.25	slow_subsidence	greenhouse	west_gondwanaland
Guara Formation	Mesozoic	\N	non-channelized_fluvial_deposits	1	slow_subsidence	greenhouse	west_gondwanaland
Guara Formation	Mesozoic	\N	non-channelized_fluvial_deposits	1	slow_subsidence	greenhouse	west_gondwanaland
Guara Formation	Mesozoic	\N	non-channelized_fluvial_deposits	1	slow_subsidence	greenhouse	west_gondwanaland
Guara Formation	Mesozoic	\N	non-channelized_fluvial_deposits	0.5	slow_subsidence	greenhouse	west_gondwanaland
Guara Formation	Mesozoic	\N	fluvial_channel	3	slow_subsidence	greenhouse	west_gondwanaland
Guara Formation	Mesozoic	cross-strata_package	\N	1.25	slow_subsidence	greenhouse	west_gondwanaland
Guara Formation	Mesozoic	cross-strata_package	\N	1.25	slow_subsidence	greenhouse	west_gondwanaland
Guara Formation	Mesozoic	cross-strata_package	\N	1	slow_subsidence	greenhouse	west_gondwanaland
Guara Formation	Mesozoic	cross-strata_package	\N	1	slow_subsidence	greenhouse	west_gondwanaland
Guara Formation	Mesozoic	cross-strata_package	\N	1	slow_subsidence	greenhouse	west_gondwanaland
Guara Formation	Mesozoic	cross-strata_package	\N	1.25	slow_subsidence	greenhouse	west_gondwanaland
Guara Formation	Mesozoic	cross-strata_package	\N	1.25	slow_subsidence	greenhouse	west_gondwanaland
Guara Formation	Mesozoic	interdune_damp	\N	0.6	slow_subsidence	greenhouse	west_gondwanaland
Guara Formation	Mesozoic	interdune_damp	\N	2	slow_subsidence	greenhouse	west_gondwanaland
Guara Formation	Mesozoic	interdune_damp	\N	0.75	slow_subsidence	greenhouse	west_gondwanaland
Guara Formation	Mesozoic	interdune_damp	\N	0.3	slow_subsidence	greenhouse	west_gondwanaland
Guara Formation	Mesozoic	interdune_damp	\N	0.3	slow_subsidence	greenhouse	west_gondwanaland
Guara Formation	Mesozoic	interdune_damp	\N	1.2	slow_subsidence	greenhouse	west_gondwanaland
Guara Formation	Mesozoic	interdune_damp	\N	1	slow_subsidence	greenhouse	west_gondwanaland
Guara Formation	Mesozoic	sandsheet_undifferentiated	\N	1.6	slow_subsidence	greenhouse	west_gondwanaland
Guara Formation	Mesozoic	sandsheet_undifferentiated	\N	0.3	slow_subsidence	greenhouse	west_gondwanaland
Guara Formation	Mesozoic	sandsheet_undifferentiated	\N	0.75	slow_subsidence	greenhouse	west_gondwanaland
Guara Formation	Mesozoic	sandsheet_undifferentiated	\N	1.2	slow_subsidence	greenhouse	west_gondwanaland
Guara Formation	Mesozoic	sandsheet_undifferentiated	\N	0.6	slow_subsidence	greenhouse	west_gondwanaland
Guara Formation	Mesozoic	sandsheet_undifferentiated	\N	0.3	slow_subsidence	greenhouse	west_gondwanaland
Guara Formation	Mesozoic	sandsheet_undifferentiated	\N	2.75	slow_subsidence	greenhouse	west_gondwanaland
Guara Formation	Mesozoic	sandsheet_undifferentiated	\N	3	slow_subsidence	greenhouse	west_gondwanaland
Guara Formation	Mesozoic	set	\N	4.25	slow_subsidence	greenhouse	west_gondwanaland
Guara Formation	Mesozoic	set	\N	7	slow_subsidence	greenhouse	west_gondwanaland
Guara Formation	Mesozoic	set	\N	6	slow_subsidence	greenhouse	west_gondwanaland
Guara Formation	Mesozoic	set	\N	3.5	slow_subsidence	greenhouse	west_gondwanaland
Guara Formation	Mesozoic	set	\N	4	slow_subsidence	greenhouse	west_gondwanaland
Guara Formation	Mesozoic	set	\N	2.5	slow_subsidence	greenhouse	west_gondwanaland
Guara Formation	Mesozoic	set	\N	3	slow_subsidence	greenhouse	west_gondwanaland
Guara Formation	Mesozoic	set	\N	3	slow_subsidence	greenhouse	west_gondwanaland
Guara Formation	Mesozoic	set	\N	3	slow_subsidence	greenhouse	west_gondwanaland
Guara Formation	Mesozoic	set	\N	1.25	slow_subsidence	greenhouse	west_gondwanaland
Guara Formation	Mesozoic	set	\N	1	slow_subsidence	greenhouse	west_gondwanaland
Guara Formation	Mesozoic	set	\N	3	slow_subsidence	greenhouse	west_gondwanaland
Huitrin Formation	Mesozoic	\N	fluvial_channel,fluvial_sandstone	0.75	moderate_subsidence	greenhouse	none
Huitrin Formation	Mesozoic	\N	fluvial_channel,fluvial_sandstone	0.75	moderate_subsidence	greenhouse	none
Huitrin Formation	Mesozoic	\N	fluvial_channel,fluvial_sandstone	4	moderate_subsidence	greenhouse	none
Huitrin Formation	Mesozoic	\N	fluvial_channel,fluvial_sandstone	3	moderate_subsidence	greenhouse	none
Huitrin Formation	Mesozoic	\N	fluvial_channel,fluvial_sandstone	0.5	moderate_subsidence	greenhouse	none
Huitrin Formation	Mesozoic	\N	fluvial_channel,fluvial_sandstone	1	moderate_subsidence	greenhouse	none
Huitrin Formation	Mesozoic	\N	fluvial_channel,fluvial_sandstone	1.25	moderate_subsidence	greenhouse	none
Huitrin Formation	Mesozoic	\N	fluvial_channel,fluvial_sandstone	1.25	moderate_subsidence	greenhouse	none
Huitrin Formation	Mesozoic	\N	fluvial_channel,fluvial_sandstone	1.25	moderate_subsidence	greenhouse	none
Huitrin Formation	Mesozoic	\N	fluvial_channel,fluvial_sandstone	1.5	moderate_subsidence	greenhouse	none
Huitrin Formation	Mesozoic	\N	fluvial_channel,fluvial_sandstone	1.5	moderate_subsidence	greenhouse	none
Huitrin Formation	Mesozoic	\N	fluvial_channel,fluvial_sandstone	0.25	moderate_subsidence	greenhouse	none
Huitrin Formation	Mesozoic	\N	fluvial_channel,fluvial_sandstone	1.25	moderate_subsidence	greenhouse	none
Huitrin Formation	Mesozoic	\N	fluvial_channel,fluvial_sandstone	1	moderate_subsidence	greenhouse	none
Huitrin Formation	Mesozoic	\N	fluvial_channel,fluvial_sandstone	0.5	moderate_subsidence	greenhouse	none
Huitrin Formation	Mesozoic	\N	fluvial_channel,fluvial_sandstone	2	moderate_subsidence	greenhouse	none
Huitrin Formation	Mesozoic	\N	fluvial_channel,fluvial_sandstone	1	moderate_subsidence	greenhouse	none
Huitrin Formation	Mesozoic	\N	fluvial_channel,fluvial_sandstone	1	moderate_subsidence	greenhouse	none
Huitrin Formation	Mesozoic	\N	fluvial_channel,fluvial_sandstone	0.5	moderate_subsidence	greenhouse	none
Huitrin Formation	Mesozoic	\N	fluvial_channel,fluvial_sandstone	0.25	moderate_subsidence	greenhouse	none
Huitrin Formation	Mesozoic	\N	fluvial_mudstone,non-channelized_fluvial_deposits	0.75	moderate_subsidence	greenhouse	none
Huitrin Formation	Mesozoic	\N	fluvial_mudstone,non-channelized_fluvial_deposits	0.25	moderate_subsidence	greenhouse	none
Huitrin Formation	Mesozoic	\N	fluvial_mudstone,non-channelized_fluvial_deposits	0.25	moderate_subsidence	greenhouse	none
Huitrin Formation	Mesozoic	\N	fluvial_mudstone,non-channelized_fluvial_deposits	0.25	moderate_subsidence	greenhouse	none
Huitrin Formation	Mesozoic	\N	fluvial_mudstone,non-channelized_fluvial_deposits	0.25	moderate_subsidence	greenhouse	none
Huitrin Formation	Mesozoic	\N	fluvial_mudstone,non-channelized_fluvial_deposits	0.25	moderate_subsidence	greenhouse	none
Huitrin Formation	Mesozoic	\N	fluvial_mudstone,non-channelized_fluvial_deposits	0.25	moderate_subsidence	greenhouse	none
Huitrin Formation	Mesozoic	\N	marine_siliciclastics	2	moderate_subsidence	greenhouse	none
Huitrin Formation	Mesozoic	\N	non-channelized_fluvial_deposits	0.75	moderate_subsidence	greenhouse	none
Huitrin Formation	Mesozoic	\N	non-channelized_fluvial_deposits	0.75	moderate_subsidence	greenhouse	none
Agrio Formation	Mesozoic	\N	\N	0.5	moderate_subsidence	greenhouse	none
Agrio Formation	Mesozoic	\N	fluvial_channel	2	moderate_subsidence	greenhouse	none
Agrio Formation	Mesozoic	\N	fluvial_channel	1.75	moderate_subsidence	greenhouse	none
Agrio Formation	Mesozoic	\N	fluvial_channel	3.5	moderate_subsidence	greenhouse	none
Agrio Formation	Mesozoic	\N	fluvial_channel	3.5	moderate_subsidence	greenhouse	none
Agrio Formation	Mesozoic	\N	fluvial_channel	4	moderate_subsidence	greenhouse	none
Agrio Formation	Mesozoic	\N	fluvial_channel	1.5	moderate_subsidence	greenhouse	none
Agrio Formation	Mesozoic	\N	fluvial_channel	0.5	moderate_subsidence	greenhouse	none
Agrio Formation	Mesozoic	\N	fluvial_channel	1	moderate_subsidence	greenhouse	none
Agrio Formation	Mesozoic	\N	fluvial_channel	0.5	moderate_subsidence	greenhouse	none
Agrio Formation	Mesozoic	\N	fluvial_channel	1	moderate_subsidence	greenhouse	none
Agrio Formation	Mesozoic	\N	fluvial_channel	1	moderate_subsidence	greenhouse	none
Agrio Formation	Mesozoic	\N	fluvial_channel	0.5	moderate_subsidence	greenhouse	none
Agrio Formation	Mesozoic	\N	fluvial_channel	0.5	moderate_subsidence	greenhouse	none
Agrio Formation	Mesozoic	\N	fluvial_channel	0.5	moderate_subsidence	greenhouse	none
Agrio Formation	Mesozoic	\N	fluvial_channel	6	moderate_subsidence	greenhouse	none
Agrio Formation	Mesozoic	\N	non-channelized_fluvial_deposits	1	moderate_subsidence	greenhouse	none
Agrio Formation	Mesozoic	\N	non-channelized_fluvial_deposits	3	moderate_subsidence	greenhouse	none
Agrio Formation	Mesozoic	\N	non-channelized_fluvial_deposits	1.25	moderate_subsidence	greenhouse	none
Agrio Formation	Mesozoic	\N	non-channelized_fluvial_deposits	0.5	moderate_subsidence	greenhouse	none
Agrio Formation	Mesozoic	\N	non-channelized_fluvial_deposits	1.25	moderate_subsidence	greenhouse	none
Agrio Formation	Mesozoic	\N	non-channelized_fluvial_deposits	1	moderate_subsidence	greenhouse	none
Agrio Formation	Mesozoic	\N	non-channelized_fluvial_deposits	1.5	moderate_subsidence	greenhouse	none
Agrio Formation	Mesozoic	\N	non-channelized_fluvial_deposits	5	moderate_subsidence	greenhouse	none
Agrio Formation	Mesozoic	\N	non-channelized_fluvial_deposits	1	moderate_subsidence	greenhouse	none
Agrio Formation	Mesozoic	\N	non-channelized_fluvial_deposits	1	moderate_subsidence	greenhouse	none
Agrio Formation	Mesozoic	\N	non-channelized_fluvial_deposits	1	moderate_subsidence	greenhouse	none
Agrio Formation	Mesozoic	\N	non-channelized_fluvial_deposits	0.75	moderate_subsidence	greenhouse	none
Sao Sebastio Formation	Mesozoic	\N	\N	2	moderate_subsidence	greenhouse	west_gondwanaland
Sao Sebastio Formation	Mesozoic	\N	fluvial_channel	0.5	moderate_subsidence	greenhouse	west_gondwanaland
Sao Sebastio Formation	Mesozoic	\N	fluvial_channel	1.25	moderate_subsidence	greenhouse	west_gondwanaland
Sao Sebastio Formation	Mesozoic	\N	fluvial_channel	2	moderate_subsidence	greenhouse	west_gondwanaland
Sao Sebastio Formation	Mesozoic	\N	fluvial_channel	0.35	moderate_subsidence	greenhouse	west_gondwanaland
Sao Sebastio Formation	Mesozoic	\N	fluvial_channel	0.8	moderate_subsidence	greenhouse	west_gondwanaland
Sao Sebastio Formation	Mesozoic	\N	fluvial_channel	0.6	moderate_subsidence	greenhouse	west_gondwanaland
Sao Sebastio Formation	Mesozoic	\N	fluvial_sandstone,non-channelized_fluvial_deposits	2.5	moderate_subsidence	greenhouse	west_gondwanaland
Sao Sebastio Formation	Mesozoic	\N	fluvial_sandstone,non-channelized_fluvial_deposits	1	moderate_subsidence	greenhouse	west_gondwanaland
Sao Sebastio Formation	Mesozoic	\N	fluvial_sandstone,non-channelized_fluvial_deposits	0.5	moderate_subsidence	greenhouse	west_gondwanaland
Sao Sebastio Formation	Mesozoic	\N	fluvial_sandstone,non-channelized_fluvial_deposits	0.5	moderate_subsidence	greenhouse	west_gondwanaland
Sao Sebastio Formation	Mesozoic	\N	fluvial_sandstone,non-channelized_fluvial_deposits	0.5	moderate_subsidence	greenhouse	west_gondwanaland
Sao Sebastio Formation	Mesozoic	\N	fluvial_sandstone,non-channelized_fluvial_deposits	0.5	moderate_subsidence	greenhouse	west_gondwanaland
Sao Sebastio Formation	Mesozoic	\N	fluvial_sandstone,non-channelized_fluvial_deposits	0.5	moderate_subsidence	greenhouse	west_gondwanaland
Sao Sebastio Formation	Mesozoic	\N	fluvial_sandstone,non-channelized_fluvial_deposits	0.5	moderate_subsidence	greenhouse	west_gondwanaland
Sao Sebastio Formation	Mesozoic	\N	fluvial_sandstone,non-channelized_fluvial_deposits	0.5	moderate_subsidence	greenhouse	west_gondwanaland
Sao Sebastio Formation	Mesozoic	\N	fluvial_sandstone,non-channelized_fluvial_deposits	0.5	moderate_subsidence	greenhouse	west_gondwanaland
Sao Sebastio Formation	Mesozoic	\N	fluvial_sandstone,non-channelized_fluvial_deposits	0.25	moderate_subsidence	greenhouse	west_gondwanaland
Sao Sebastio Formation	Mesozoic	\N	fluvial_sandstone,non-channelized_fluvial_deposits	1.75	moderate_subsidence	greenhouse	west_gondwanaland
Sergi Formation	Mesozoic	\N	\N	5	moderate_subsidence	greenhouse	west_gondwanaland
Sergi Formation	Mesozoic	\N	\N	0.25	moderate_subsidence	greenhouse	west_gondwanaland
Sergi Formation	Mesozoic	\N	\N	3.5	moderate_subsidence	greenhouse	west_gondwanaland
Sergi Formation	Mesozoic	\N	\N	0.25	moderate_subsidence	greenhouse	west_gondwanaland
Sergi Formation	Mesozoic	\N	\N	1	moderate_subsidence	greenhouse	west_gondwanaland
Sergi Formation	Mesozoic	\N	\N	0.75	moderate_subsidence	greenhouse	west_gondwanaland
Sergi Formation	Mesozoic	\N	\N	20	moderate_subsidence	greenhouse	west_gondwanaland
Sergi Formation	Mesozoic	\N	\N	6	moderate_subsidence	greenhouse	west_gondwanaland
Sergi Formation	Mesozoic	\N	\N	18	moderate_subsidence	greenhouse	west_gondwanaland
Sergi Formation	Mesozoic	\N	\N	9	moderate_subsidence	greenhouse	west_gondwanaland
Sergi Formation	Mesozoic	\N	fluvial_channel	1.5	moderate_subsidence	greenhouse	west_gondwanaland
Sergi Formation	Mesozoic	\N	fluvial_channel	9	moderate_subsidence	greenhouse	west_gondwanaland
Sergi Formation	Mesozoic	\N	fluvial_channel	0.5	moderate_subsidence	greenhouse	west_gondwanaland
Sergi Formation	Mesozoic	\N	fluvial_channel	3	moderate_subsidence	greenhouse	west_gondwanaland
Sergi Formation	Mesozoic	\N	fluvial_channel	3	moderate_subsidence	greenhouse	west_gondwanaland
Sergi Formation	Mesozoic	\N	fluvial_channel	4	moderate_subsidence	greenhouse	west_gondwanaland
Sergi Formation	Mesozoic	\N	fluvial_channel	5	moderate_subsidence	greenhouse	west_gondwanaland
Sergi Formation	Mesozoic	\N	fluvial_channel	5	moderate_subsidence	greenhouse	west_gondwanaland
Sergi Formation	Mesozoic	\N	fluvial_channel	5	moderate_subsidence	greenhouse	west_gondwanaland
Sergi Formation	Mesozoic	\N	fluvial_channel	8	moderate_subsidence	greenhouse	west_gondwanaland
Sergi Formation	Mesozoic	\N	fluvial_channel	0.25	moderate_subsidence	greenhouse	west_gondwanaland
Sergi Formation	Mesozoic	\N	fluvial_channel	2.5	moderate_subsidence	greenhouse	west_gondwanaland
Sergi Formation	Mesozoic	\N	fluvial_channel	7	moderate_subsidence	greenhouse	west_gondwanaland
Sergi Formation	Mesozoic	\N	fluvial_channel	3	moderate_subsidence	greenhouse	west_gondwanaland
Sergi Formation	Mesozoic	\N	fluvial_channel	0.5	moderate_subsidence	greenhouse	west_gondwanaland
Sergi Formation	Mesozoic	\N	fluvial_channel	5	moderate_subsidence	greenhouse	west_gondwanaland
Sergi Formation	Mesozoic	\N	fluvial_channel	5	moderate_subsidence	greenhouse	west_gondwanaland
Sergi Formation	Mesozoic	\N	fluvial_channel	7	moderate_subsidence	greenhouse	west_gondwanaland
Sergi Formation	Mesozoic	\N	fluvial_channel	4	moderate_subsidence	greenhouse	west_gondwanaland
Sergi Formation	Mesozoic	\N	fluvial_channel	4	moderate_subsidence	greenhouse	west_gondwanaland
Sergi Formation	Mesozoic	\N	fluvial_channel	10	moderate_subsidence	greenhouse	west_gondwanaland
Sergi Formation	Mesozoic	\N	fluvial_channel	9.5	moderate_subsidence	greenhouse	west_gondwanaland
Sergi Formation	Mesozoic	\N	fluvial_channel	10	moderate_subsidence	greenhouse	west_gondwanaland
Sergi Formation	Mesozoic	\N	fluvial_channel	10	moderate_subsidence	greenhouse	west_gondwanaland
Sergi Formation	Mesozoic	\N	fluvial_channel	4	moderate_subsidence	greenhouse	west_gondwanaland
Sergi Formation	Mesozoic	\N	fluvial_channel	2.5	moderate_subsidence	greenhouse	west_gondwanaland
Sergi Formation	Mesozoic	\N	fluvial_channel	4	moderate_subsidence	greenhouse	west_gondwanaland
Sergi Formation	Mesozoic	\N	fluvial_channel	4	moderate_subsidence	greenhouse	west_gondwanaland
Sergi Formation	Mesozoic	\N	fluvial_channel	0.25	moderate_subsidence	greenhouse	west_gondwanaland
Sergi Formation	Mesozoic	\N	fluvial_channel	0.25	moderate_subsidence	greenhouse	west_gondwanaland
Sergi Formation	Mesozoic	\N	fluvial_channel	4	moderate_subsidence	greenhouse	west_gondwanaland
Sergi Formation	Mesozoic	\N	fluvial_channel	2.5	moderate_subsidence	greenhouse	west_gondwanaland
Sergi Formation	Mesozoic	\N	fluvial_channel	3	moderate_subsidence	greenhouse	west_gondwanaland
Sergi Formation	Mesozoic	\N	fluvial_channel	3	moderate_subsidence	greenhouse	west_gondwanaland
Sergi Formation	Mesozoic	\N	fluvial_channel	3	moderate_subsidence	greenhouse	west_gondwanaland
Sergi Formation	Mesozoic	\N	fluvial_channel	6	moderate_subsidence	greenhouse	west_gondwanaland
Sergi Formation	Mesozoic	\N	fluvial_channel	3	moderate_subsidence	greenhouse	west_gondwanaland
Sergi Formation	Mesozoic	\N	fluvial_channel	2	moderate_subsidence	greenhouse	west_gondwanaland
Sergi Formation	Mesozoic	\N	fluvial_channel	2	moderate_subsidence	greenhouse	west_gondwanaland
Sergi Formation	Mesozoic	\N	fluvial_channel	5	moderate_subsidence	greenhouse	west_gondwanaland
Sergi Formation	Mesozoic	\N	fluvial_channel	3	moderate_subsidence	greenhouse	west_gondwanaland
Sergi Formation	Mesozoic	\N	fluvial_channel	8	moderate_subsidence	greenhouse	west_gondwanaland
Sergi Formation	Mesozoic	\N	fluvial_channel	8	moderate_subsidence	greenhouse	west_gondwanaland
Sergi Formation	Mesozoic	\N	fluvial_channel	0.25	moderate_subsidence	greenhouse	west_gondwanaland
Sergi Formation	Mesozoic	\N	fluvial_channel	0.75	moderate_subsidence	greenhouse	west_gondwanaland
Sergi Formation	Mesozoic	\N	fluvial_channel	2.25	moderate_subsidence	greenhouse	west_gondwanaland
Sergi Formation	Mesozoic	\N	fluvial_channel	2.5	moderate_subsidence	greenhouse	west_gondwanaland
Sergi Formation	Mesozoic	\N	fluvial_channel	2.5	moderate_subsidence	greenhouse	west_gondwanaland
Sergi Formation	Mesozoic	\N	fluvial_channel	2.5	moderate_subsidence	greenhouse	west_gondwanaland
Sergi Formation	Mesozoic	\N	fluvial_channel	1.5	moderate_subsidence	greenhouse	west_gondwanaland
Sergi Formation	Mesozoic	\N	fluvial_channel	3	moderate_subsidence	greenhouse	west_gondwanaland
Sergi Formation	Mesozoic	\N	fluvial_channel	2	moderate_subsidence	greenhouse	west_gondwanaland
Sergi Formation	Mesozoic	\N	fluvial_channel	1.5	moderate_subsidence	greenhouse	west_gondwanaland
Sergi Formation	Mesozoic	\N	fluvial_channel	1.5	moderate_subsidence	greenhouse	west_gondwanaland
Sergi Formation	Mesozoic	\N	fluvial_channel	1	moderate_subsidence	greenhouse	west_gondwanaland
Sergi Formation	Mesozoic	\N	fluvial_channel	0.25	moderate_subsidence	greenhouse	west_gondwanaland
Sergi Formation	Mesozoic	\N	fluvial_channel	1.5	moderate_subsidence	greenhouse	west_gondwanaland
Sergi Formation	Mesozoic	\N	fluvial_channel	2	moderate_subsidence	greenhouse	west_gondwanaland
Sergi Formation	Mesozoic	\N	fluvial_channel	2	moderate_subsidence	greenhouse	west_gondwanaland
Sergi Formation	Mesozoic	\N	fluvial_channel	7	moderate_subsidence	greenhouse	west_gondwanaland
Sergi Formation	Mesozoic	\N	fluvial_channel	2.5	moderate_subsidence	greenhouse	west_gondwanaland
Sergi Formation	Mesozoic	\N	fluvial_channel	2	moderate_subsidence	greenhouse	west_gondwanaland
Sergi Formation	Mesozoic	\N	fluvial_channel	2	moderate_subsidence	greenhouse	west_gondwanaland
Sergi Formation	Mesozoic	\N	fluvial_channel	0.5	moderate_subsidence	greenhouse	west_gondwanaland
Sergi Formation	Mesozoic	\N	fluvial_channel	0.5	moderate_subsidence	greenhouse	west_gondwanaland
Sergi Formation	Mesozoic	\N	fluvial_channel	1.1	moderate_subsidence	greenhouse	west_gondwanaland
Sergi Formation	Mesozoic	\N	fluvial_channel	0.75	moderate_subsidence	greenhouse	west_gondwanaland
Sergi Formation	Mesozoic	\N	fluvial_channel	2.2	moderate_subsidence	greenhouse	west_gondwanaland
Sergi Formation	Mesozoic	\N	fluvial_channel	1.2	moderate_subsidence	greenhouse	west_gondwanaland
Sergi Formation	Mesozoic	\N	fluvial_channel	0.8	moderate_subsidence	greenhouse	west_gondwanaland
Sergi Formation	Mesozoic	\N	fluvial_channel	0.1	moderate_subsidence	greenhouse	west_gondwanaland
Sergi Formation	Mesozoic	\N	fluvial_channel	0.9	moderate_subsidence	greenhouse	west_gondwanaland
Sergi Formation	Mesozoic	\N	fluvial_channel	0.6	moderate_subsidence	greenhouse	west_gondwanaland
Sergi Formation	Mesozoic	\N	fluvial_channel	2	moderate_subsidence	greenhouse	west_gondwanaland
Sergi Formation	Mesozoic	\N	fluvial_channel	2.6	moderate_subsidence	greenhouse	west_gondwanaland
Sergi Formation	Mesozoic	\N	fluvial_channel	25	moderate_subsidence	greenhouse	west_gondwanaland
Sergi Formation	Mesozoic	\N	fluvial_channel	10.5	moderate_subsidence	greenhouse	west_gondwanaland
Sergi Formation	Mesozoic	\N	fluvial_channel	12	moderate_subsidence	greenhouse	west_gondwanaland
Sergi Formation	Mesozoic	\N	fluvial_channel	2.25	moderate_subsidence	greenhouse	west_gondwanaland
Sergi Formation	Mesozoic	\N	fluvial_channel	2.5	moderate_subsidence	greenhouse	west_gondwanaland
Sergi Formation	Mesozoic	\N	fluvial_channel	1.25	moderate_subsidence	greenhouse	west_gondwanaland
Sergi Formation	Mesozoic	\N	fluvial_channel	1.5	moderate_subsidence	greenhouse	west_gondwanaland
Sergi Formation	Mesozoic	\N	fluvial_channel	3	moderate_subsidence	greenhouse	west_gondwanaland
Sergi Formation	Mesozoic	\N	fluvial_channel	2.5	moderate_subsidence	greenhouse	west_gondwanaland
Sergi Formation	Mesozoic	\N	fluvial_channel	3.5	moderate_subsidence	greenhouse	west_gondwanaland
Sergi Formation	Mesozoic	\N	fluvial_channel	1.5	moderate_subsidence	greenhouse	west_gondwanaland
Sergi Formation	Mesozoic	\N	fluvial_channel	1.5	moderate_subsidence	greenhouse	west_gondwanaland
Sergi Formation	Mesozoic	\N	fluvial_channel	6	moderate_subsidence	greenhouse	west_gondwanaland
Sergi Formation	Mesozoic	\N	fluvial_channel	4	moderate_subsidence	greenhouse	west_gondwanaland
Sergi Formation	Mesozoic	\N	fluvial_channel	3.5	moderate_subsidence	greenhouse	west_gondwanaland
Sergi Formation	Mesozoic	\N	fluvial_channel	3	moderate_subsidence	greenhouse	west_gondwanaland
Sergi Formation	Mesozoic	\N	fluvial_channel	4	moderate_subsidence	greenhouse	west_gondwanaland
Sergi Formation	Mesozoic	\N	fluvial_channel	3	moderate_subsidence	greenhouse	west_gondwanaland
Sergi Formation	Mesozoic	\N	fluvial_channel	15	moderate_subsidence	greenhouse	west_gondwanaland
Sergi Formation	Mesozoic	\N	fluvial_channel	1.25	moderate_subsidence	greenhouse	west_gondwanaland
Sergi Formation	Mesozoic	\N	fluvial_channel	3.25	moderate_subsidence	greenhouse	west_gondwanaland
Sergi Formation	Mesozoic	\N	fluvial_channel	4	moderate_subsidence	greenhouse	west_gondwanaland
Sergi Formation	Mesozoic	\N	fluvial_channel	1.25	moderate_subsidence	greenhouse	west_gondwanaland
Sergi Formation	Mesozoic	\N	fluvial_channel	0.75	moderate_subsidence	greenhouse	west_gondwanaland
Sergi Formation	Mesozoic	\N	fluvial_mudstone,non-channelized_fluvial_deposits	0.25	moderate_subsidence	greenhouse	west_gondwanaland
Sergi Formation	Mesozoic	\N	lacustrine_siliciclastics	9	moderate_subsidence	greenhouse	west_gondwanaland
Sergi Formation	Mesozoic	\N	lacustrine_siliciclastics	1.5	moderate_subsidence	greenhouse	west_gondwanaland
Sergi Formation	Mesozoic	\N	lacustrine_siliciclastics	1	moderate_subsidence	greenhouse	west_gondwanaland
Sergi Formation	Mesozoic	\N	lacustrine_siliciclastics	1.5	moderate_subsidence	greenhouse	west_gondwanaland
Sergi Formation	Mesozoic	\N	lacustrine_siliciclastics	1	moderate_subsidence	greenhouse	west_gondwanaland
Sergi Formation	Mesozoic	\N	lacustrine_siliciclastics	6	moderate_subsidence	greenhouse	west_gondwanaland
Sergi Formation	Mesozoic	\N	lacustrine_siliciclastics	1	moderate_subsidence	greenhouse	west_gondwanaland
Sergi Formation	Mesozoic	\N	lacustrine_siliciclastics	4	moderate_subsidence	greenhouse	west_gondwanaland
Sergi Formation	Mesozoic	\N	lacustrine_siliciclastics	2	moderate_subsidence	greenhouse	west_gondwanaland
Sergi Formation	Mesozoic	\N	lacustrine_siliciclastics	3	moderate_subsidence	greenhouse	west_gondwanaland
Sergi Formation	Mesozoic	\N	lacustrine_siliciclastics	3	moderate_subsidence	greenhouse	west_gondwanaland
Sergi Formation	Mesozoic	\N	lacustrine_siliciclastics	1	moderate_subsidence	greenhouse	west_gondwanaland
Sergi Formation	Mesozoic	\N	lacustrine_siliciclastics	2	moderate_subsidence	greenhouse	west_gondwanaland
Sergi Formation	Mesozoic	\N	lacustrine_siliciclastics	1.5	moderate_subsidence	greenhouse	west_gondwanaland
Sergi Formation	Mesozoic	\N	lacustrine_siliciclastics	1	moderate_subsidence	greenhouse	west_gondwanaland
Sergi Formation	Mesozoic	\N	lacustrine_siliciclastics	2	moderate_subsidence	greenhouse	west_gondwanaland
Sergi Formation	Mesozoic	\N	lacustrine_siliciclastics	2	moderate_subsidence	greenhouse	west_gondwanaland
Sergi Formation	Mesozoic	\N	lacustrine_siliciclastics	0.5	moderate_subsidence	greenhouse	west_gondwanaland
Sergi Formation	Mesozoic	\N	lacustrine_siliciclastics	1	moderate_subsidence	greenhouse	west_gondwanaland
Sergi Formation	Mesozoic	\N	lacustrine_siliciclastics	1	moderate_subsidence	greenhouse	west_gondwanaland
Sergi Formation	Mesozoic	\N	lacustrine_siliciclastics	1	moderate_subsidence	greenhouse	west_gondwanaland
Sergi Formation	Mesozoic	\N	lacustrine_siliciclastics	1	moderate_subsidence	greenhouse	west_gondwanaland
Sergi Formation	Mesozoic	\N	lacustrine_siliciclastics	1	moderate_subsidence	greenhouse	west_gondwanaland
Sergi Formation	Mesozoic	\N	lacustrine_siliciclastics	1.5	moderate_subsidence	greenhouse	west_gondwanaland
Sergi Formation	Mesozoic	\N	lacustrine_siliciclastics	4.5	moderate_subsidence	greenhouse	west_gondwanaland
Sergi Formation	Mesozoic	\N	lacustrine_siliciclastics	2	moderate_subsidence	greenhouse	west_gondwanaland
Sergi Formation	Mesozoic	\N	lacustrine_siliciclastics	4	moderate_subsidence	greenhouse	west_gondwanaland
Sergi Formation	Mesozoic	\N	lacustrine_siliciclastics	2	moderate_subsidence	greenhouse	west_gondwanaland
Sergi Formation	Mesozoic	\N	lacustrine_siliciclastics	2.5	moderate_subsidence	greenhouse	west_gondwanaland
Sergi Formation	Mesozoic	\N	lacustrine_siliciclastics	0.25	moderate_subsidence	greenhouse	west_gondwanaland
Sergi Formation	Mesozoic	\N	lacustrine_siliciclastics	0.25	moderate_subsidence	greenhouse	west_gondwanaland
Sergi Formation	Mesozoic	\N	lacustrine_siliciclastics	0.25	moderate_subsidence	greenhouse	west_gondwanaland
Sergi Formation	Mesozoic	\N	non-channelized_fluvial_deposits	1	moderate_subsidence	greenhouse	west_gondwanaland
Sergi Formation	Mesozoic	\N	non-channelized_fluvial_deposits	1	moderate_subsidence	greenhouse	west_gondwanaland
Sergi Formation	Mesozoic	\N	non-channelized_fluvial_deposits	0.5	moderate_subsidence	greenhouse	west_gondwanaland
Sergi Formation	Mesozoic	\N	non-channelized_fluvial_deposits	5	moderate_subsidence	greenhouse	west_gondwanaland
Sergi Formation	Mesozoic	\N	non-channelized_fluvial_deposits	0.5	moderate_subsidence	greenhouse	west_gondwanaland
Sergi Formation	Mesozoic	\N	non-channelized_fluvial_deposits	0.5	moderate_subsidence	greenhouse	west_gondwanaland
Sergi Formation	Mesozoic	\N	non-channelized_fluvial_deposits	1	moderate_subsidence	greenhouse	west_gondwanaland
Sergi Formation	Mesozoic	\N	non-channelized_fluvial_deposits	2.5	moderate_subsidence	greenhouse	west_gondwanaland
Sergi Formation	Mesozoic	\N	non-channelized_fluvial_deposits	2.5	moderate_subsidence	greenhouse	west_gondwanaland
Sergi Formation	Mesozoic	\N	non-channelized_fluvial_deposits	1	moderate_subsidence	greenhouse	west_gondwanaland
Sergi Formation	Mesozoic	\N	non-channelized_fluvial_deposits	0.25	moderate_subsidence	greenhouse	west_gondwanaland
Sergi Formation	Mesozoic	\N	non-channelized_fluvial_deposits	0.25	moderate_subsidence	greenhouse	west_gondwanaland
Sergi Formation	Mesozoic	\N	non-channelized_fluvial_deposits	0.25	moderate_subsidence	greenhouse	west_gondwanaland
Sergi Formation	Mesozoic	\N	non-channelized_fluvial_deposits	0.25	moderate_subsidence	greenhouse	west_gondwanaland
Sergi Formation	Mesozoic	\N	non-channelized_fluvial_deposits	0.25	moderate_subsidence	greenhouse	west_gondwanaland
Sergi Formation	Mesozoic	\N	non-channelized_fluvial_deposits	0.25	moderate_subsidence	greenhouse	west_gondwanaland
Sergi Formation	Mesozoic	\N	non-channelized_fluvial_deposits	0.5	moderate_subsidence	greenhouse	west_gondwanaland
Sergi Formation	Mesozoic	\N	non-channelized_fluvial_deposits	1	moderate_subsidence	greenhouse	west_gondwanaland
Sergi Formation	Mesozoic	\N	non-channelized_fluvial_deposits	0.75	moderate_subsidence	greenhouse	west_gondwanaland
Sergi Formation	Mesozoic	\N	non-channelized_fluvial_deposits	0.8	moderate_subsidence	greenhouse	west_gondwanaland
Sergi Formation	Mesozoic	\N	non-channelized_fluvial_deposits	1	moderate_subsidence	greenhouse	west_gondwanaland
Entrada Sandstone	Mesozoic	\N	sabkha_and_playa_lake	2	moderate_subsidence	greenhouse	pangaea
Entrada Sandstone	Mesozoic	\N	sabkha_and_playa_lake	2	moderate_subsidence	greenhouse	pangaea
Entrada Sandstone	Mesozoic	\N	sabkha_and_playa_lake	6	moderate_subsidence	greenhouse	pangaea
Entrada Sandstone	Mesozoic	\N	sabkha_and_playa_lake	7.5	moderate_subsidence	greenhouse	pangaea
Entrada Sandstone	Mesozoic	\N	sabkha_and_playa_lake	3	moderate_subsidence	greenhouse	pangaea
Entrada Sandstone	Mesozoic	\N	sabkha_and_playa_lake	4	moderate_subsidence	greenhouse	pangaea
Entrada Sandstone	Mesozoic	\N	sabkha_and_playa_lake	7	moderate_subsidence	greenhouse	pangaea
Entrada Sandstone	Mesozoic	\N	sabkha_and_playa_lake	3.75	moderate_subsidence	greenhouse	pangaea
Entrada Sandstone	Mesozoic	\N	sabkha_and_playa_lake	36.5	moderate_subsidence	greenhouse	pangaea
Entrada Sandstone	Mesozoic	\N	sabkha_and_playa_lake	5	moderate_subsidence	greenhouse	pangaea
Entrada Sandstone	Mesozoic	\N	sabkha_and_playa_lake	11.25	moderate_subsidence	greenhouse	pangaea
Entrada Sandstone	Mesozoic	\N	sabkha_and_playa_lake	5	moderate_subsidence	greenhouse	pangaea
Entrada Sandstone	Mesozoic	\N	sabkha_and_playa_lake	0.4	moderate_subsidence	greenhouse	pangaea
Page Sandstone	Mesozoic	\N	paleosol	1	moderate_subsidence	greenhouse	none
Page Sandstone	Mesozoic	\N	paleosol	0.5	moderate_subsidence	greenhouse	none
Wolfville Formation	Mesozoic	\N	\N	90	moderate_subsidence	greenhouse	pangaea
Wolfville Formation	Mesozoic	\N	alluvial_conglomerate	25	moderate_subsidence	greenhouse	pangaea
Wolfville Formation	Mesozoic	\N	alluvial_conglomerate	2.5	moderate_subsidence	greenhouse	pangaea
Wolfville Formation	Mesozoic	\N	alluvial_conglomerate	2	moderate_subsidence	greenhouse	pangaea
Wolfville Formation	Mesozoic	\N	alluvial_conglomerate	1	moderate_subsidence	greenhouse	pangaea
Wolfville Formation	Mesozoic	\N	alluvial_conglomerate	5	moderate_subsidence	greenhouse	pangaea
Wolfville Formation	Mesozoic	\N	alluvial_conglomerate	4	moderate_subsidence	greenhouse	pangaea
Wolfville Formation	Mesozoic	\N	alluvial_conglomerate	2	moderate_subsidence	greenhouse	pangaea
Wolfville Formation	Mesozoic	\N	alluvial_conglomerate	0.5	moderate_subsidence	greenhouse	pangaea
Wolfville Formation	Mesozoic	\N	alluvial_conglomerate	1	moderate_subsidence	greenhouse	pangaea
Wolfville Formation	Mesozoic	\N	alluvial_conglomerate	10	moderate_subsidence	greenhouse	pangaea
Wolfville Formation	Mesozoic	\N	alluvial_conglomerate	17.5	moderate_subsidence	greenhouse	pangaea
Wolfville Formation	Mesozoic	\N	alluvial_conglomerate	25	moderate_subsidence	greenhouse	pangaea
Wolfville Formation	Mesozoic	\N	alluvial_conglomerate	7.5	moderate_subsidence	greenhouse	pangaea
Wolfville Formation	Mesozoic	\N	alluvial_conglomerate	3.5	moderate_subsidence	greenhouse	pangaea
Wolfville Formation	Mesozoic	\N	alluvial_conglomerate	3.5	moderate_subsidence	greenhouse	pangaea
Wolfville Formation	Mesozoic	\N	alluvial_conglomerate	1	moderate_subsidence	greenhouse	pangaea
Wolfville Formation	Mesozoic	\N	alluvial_conglomerate	0.5	moderate_subsidence	greenhouse	pangaea
Wolfville Formation	Mesozoic	\N	alluvial_conglomerate	0.5	moderate_subsidence	greenhouse	pangaea
Wolfville Formation	Mesozoic	\N	alluvial_conglomerate	3	moderate_subsidence	greenhouse	pangaea
Wolfville Formation	Mesozoic	\N	alluvial_conglomerate	3	moderate_subsidence	greenhouse	pangaea
Wolfville Formation	Mesozoic	\N	alluvial_conglomerate	8	moderate_subsidence	greenhouse	pangaea
Wolfville Formation	Mesozoic	\N	alluvial_conglomerate	3	moderate_subsidence	greenhouse	pangaea
Wolfville Formation	Mesozoic	\N	alluvial_conglomerate	2	moderate_subsidence	greenhouse	pangaea
Wolfville Formation	Mesozoic	\N	alluvial_conglomerate	3	moderate_subsidence	greenhouse	pangaea
Wolfville Formation	Mesozoic	\N	alluvial_conglomerate	4	moderate_subsidence	greenhouse	pangaea
Wolfville Formation	Mesozoic	\N	alluvial_conglomerate	1	moderate_subsidence	greenhouse	pangaea
Wolfville Formation	Mesozoic	\N	alluvial_conglomerate	3	moderate_subsidence	greenhouse	pangaea
Wolfville Formation	Mesozoic	\N	alluvial_conglomerate	2	moderate_subsidence	greenhouse	pangaea
Wolfville Formation	Mesozoic	\N	alluvial_conglomerate	1.5	moderate_subsidence	greenhouse	pangaea
Wolfville Formation	Mesozoic	\N	alluvial_conglomerate	3	moderate_subsidence	greenhouse	pangaea
Wolfville Formation	Mesozoic	\N	alluvial_conglomerate	1	moderate_subsidence	greenhouse	pangaea
Wolfville Formation	Mesozoic	\N	alluvial_conglomerate	2	moderate_subsidence	greenhouse	pangaea
Wolfville Formation	Mesozoic	\N	alluvial_conglomerate	3	moderate_subsidence	greenhouse	pangaea
Wolfville Formation	Mesozoic	\N	alluvial_conglomerate	1	moderate_subsidence	greenhouse	pangaea
Wolfville Formation	Mesozoic	\N	alluvial_conglomerate	3	moderate_subsidence	greenhouse	pangaea
Wolfville Formation	Mesozoic	\N	alluvial_conglomerate	5	moderate_subsidence	greenhouse	pangaea
Wolfville Formation	Mesozoic	\N	alluvial_conglomerate	1	moderate_subsidence	greenhouse	pangaea
Wolfville Formation	Mesozoic	\N	alluvial_conglomerate	0.5	moderate_subsidence	greenhouse	pangaea
Wolfville Formation	Mesozoic	\N	alluvial_conglomerate	0.5	moderate_subsidence	greenhouse	pangaea
Wolfville Formation	Mesozoic	\N	alluvial_conglomerate	44	moderate_subsidence	greenhouse	pangaea
Wolfville Formation	Mesozoic	\N	fluvial_channel,fluvial_sandstone	10	moderate_subsidence	greenhouse	pangaea
Wolfville Formation	Mesozoic	\N	fluvial_channel,fluvial_sandstone	20	moderate_subsidence	greenhouse	pangaea
Wolfville Formation	Mesozoic	\N	fluvial_channel,fluvial_sandstone	10	moderate_subsidence	greenhouse	pangaea
Wolfville Formation	Mesozoic	\N	fluvial_channel,fluvial_sandstone	15	moderate_subsidence	greenhouse	pangaea
Wolfville Formation	Mesozoic	\N	fluvial_channel,fluvial_sandstone	10	moderate_subsidence	greenhouse	pangaea
Wolfville Formation	Mesozoic	\N	fluvial_mudstone,non-channelized_fluvial_deposits	1	moderate_subsidence	greenhouse	pangaea
Wolfville Formation	Mesozoic	\N	fluvial_mudstone,non-channelized_fluvial_deposits	1	moderate_subsidence	greenhouse	pangaea
Wolfville Formation	Mesozoic	\N	fluvial_mudstone,non-channelized_fluvial_deposits	2	moderate_subsidence	greenhouse	pangaea
Wolfville Formation	Mesozoic	\N	fluvial_mudstone,non-channelized_fluvial_deposits	20	moderate_subsidence	greenhouse	pangaea
Wolfville Formation	Mesozoic	\N	fluvial_mudstone,non-channelized_fluvial_deposits	1	moderate_subsidence	greenhouse	pangaea
Wolfville Formation	Mesozoic	\N	fluvial_mudstone,non-channelized_fluvial_deposits	2.5	moderate_subsidence	greenhouse	pangaea
Wolfville Formation	Mesozoic	\N	fluvial_mudstone,non-channelized_fluvial_deposits	5	moderate_subsidence	greenhouse	pangaea
Wolfville Formation	Mesozoic	\N	fluvial_mudstone,non-channelized_fluvial_deposits	5	moderate_subsidence	greenhouse	pangaea
Wolfville Formation	Mesozoic	\N	fluvial_mudstone,non-channelized_fluvial_deposits	2.5	moderate_subsidence	greenhouse	pangaea
Wolfville Formation	Mesozoic	\N	fluvial_mudstone,non-channelized_fluvial_deposits	11	moderate_subsidence	greenhouse	pangaea
Wolfville Formation	Mesozoic	\N	fluvial_sandstone	12	moderate_subsidence	greenhouse	pangaea
Wolfville Formation	Mesozoic	\N	fluvial_sandstone,non-channelized_fluvial_deposits	5	moderate_subsidence	greenhouse	pangaea
Wolfville Formation	Mesozoic	\N	fluvial_sandstone,non-channelized_fluvial_deposits	5	moderate_subsidence	greenhouse	pangaea
Wolfville Formation	Mesozoic	\N	fluvial_sandstone,non-channelized_fluvial_deposits	2.5	moderate_subsidence	greenhouse	pangaea
Wolfville Formation	Mesozoic	\N	fluvial_sandstone,non-channelized_fluvial_deposits	10	moderate_subsidence	greenhouse	pangaea
Wolfville Formation	Mesozoic	\N	fluvial_sandstone,non-channelized_fluvial_deposits	5	moderate_subsidence	greenhouse	pangaea
Wolfville Formation	Mesozoic	\N	fluvial_sandstone,non-channelized_fluvial_deposits	5	moderate_subsidence	greenhouse	pangaea
Wolfville Formation	Mesozoic	\N	fluvial_sandstone,non-channelized_fluvial_deposits	2.5	moderate_subsidence	greenhouse	pangaea
Wolfville Formation	Mesozoic	\N	fluvial_sandstone,non-channelized_fluvial_deposits	2.5	moderate_subsidence	greenhouse	pangaea
Wolfville Formation	Mesozoic	\N	fluvial_sandstone,non-channelized_fluvial_deposits	2.5	moderate_subsidence	greenhouse	pangaea
Wolfville Formation	Mesozoic	\N	fluvial_sandstone,non-channelized_fluvial_deposits	3	moderate_subsidence	greenhouse	pangaea
Wolfville Formation	Mesozoic	\N	fluvial_sandstone,non-channelized_fluvial_deposits	3	moderate_subsidence	greenhouse	pangaea
Wolfville Formation	Mesozoic	\N	fluvial_sandstone,non-channelized_fluvial_deposits	4.5	moderate_subsidence	greenhouse	pangaea
Wolfville Formation	Mesozoic	\N	fluvial_sandstone,non-channelized_fluvial_deposits	4.5	moderate_subsidence	greenhouse	pangaea
Wolfville Formation	Mesozoic	\N	lacustrine_siliciclastics	2.5	moderate_subsidence	greenhouse	pangaea
Wolfville Formation	Mesozoic	\N	non-channelized_fluvial_deposits	2.5	moderate_subsidence	greenhouse	pangaea
Wolfville Formation	Mesozoic	\N	non-channelized_fluvial_deposits	10	moderate_subsidence	greenhouse	pangaea
Wolfville Formation	Mesozoic	\N	non-channelized_fluvial_deposits	1	moderate_subsidence	greenhouse	pangaea
Wolfville Formation	Mesozoic	\N	non-channelized_fluvial_deposits	10	moderate_subsidence	greenhouse	pangaea
Wolfville Formation	Mesozoic	\N	sabkha_and_playa_lake	0.5	moderate_subsidence	greenhouse	pangaea
Wolfville Formation	Mesozoic	\N	sabkha_and_playa_lake	2.5	moderate_subsidence	greenhouse	pangaea
Wolfville Formation	Mesozoic	\N	sabkha_and_playa_lake	2	moderate_subsidence	greenhouse	pangaea
Wolfville Formation	Mesozoic	\N	sabkha_and_playa_lake	2	moderate_subsidence	greenhouse	pangaea
Wolfville Formation	Mesozoic	\N	sabkha_and_playa_lake	1	moderate_subsidence	greenhouse	pangaea
Wolfville Formation	Mesozoic	\N	sabkha_and_playa_lake	2	moderate_subsidence	greenhouse	pangaea
Wolfville Formation	Mesozoic	\N	sabkha_and_playa_lake	7	moderate_subsidence	greenhouse	pangaea
Wolfville Formation	Mesozoic	\N	sabkha_and_playa_lake	1	moderate_subsidence	greenhouse	pangaea
Wolfville Formation	Mesozoic	\N	sabkha_and_playa_lake	1	moderate_subsidence	greenhouse	pangaea
Wolfville Formation	Mesozoic	\N	sabkha_and_playa_lake	4	moderate_subsidence	greenhouse	pangaea
Wolfville Formation	Mesozoic	\N	sabkha_and_playa_lake	1	moderate_subsidence	greenhouse	pangaea
Wolfville Formation	Mesozoic	\N	sabkha_and_playa_lake	7	moderate_subsidence	greenhouse	pangaea
Wolfville Formation	Mesozoic	\N	sabkha_and_playa_lake	3	moderate_subsidence	greenhouse	pangaea
Wolfville Formation	Mesozoic	\N	sabkha_and_playa_lake	5	moderate_subsidence	greenhouse	pangaea
Wolfville Formation	Mesozoic	\N	sabkha_and_playa_lake	7	moderate_subsidence	greenhouse	pangaea
Wolfville Formation	Mesozoic	\N	sabkha_and_playa_lake	2.5	moderate_subsidence	greenhouse	pangaea
Wolfville Formation	Mesozoic	\N	sabkha_and_playa_lake	3	moderate_subsidence	greenhouse	pangaea
Wolfville Formation	Mesozoic	\N	sabkha_and_playa_lake	2.5	moderate_subsidence	greenhouse	pangaea
Wolfville Formation	Mesozoic	\N	sabkha_and_playa_lake	0.5	moderate_subsidence	greenhouse	pangaea
Wolfville Formation	Mesozoic	\N	sabkha_and_playa_lake	2.5	moderate_subsidence	greenhouse	pangaea
Wolfville Formation	Mesozoic	\N	sabkha_and_playa_lake	2.5	moderate_subsidence	greenhouse	pangaea
Wolfville Formation	Mesozoic	\N	sabkha_and_playa_lake	7.5	moderate_subsidence	greenhouse	pangaea
Wolfville Formation	Mesozoic	\N	sabkha_and_playa_lake	1	moderate_subsidence	greenhouse	pangaea
Wolfville Formation	Mesozoic	\N	sabkha_and_playa_lake	2.5	moderate_subsidence	greenhouse	pangaea
Wolfville Formation	Mesozoic	\N	sabkha_and_playa_lake	2.5	moderate_subsidence	greenhouse	pangaea
Wolfville Formation	Mesozoic	\N	sabkha_and_playa_lake	2.5	moderate_subsidence	greenhouse	pangaea
Chugwater Group	Mesozoic	\N	fluvial_channel	1	moderate_subsidence	greenhouse	pangaea
Chugwater Group	Mesozoic	\N	fluvial_channel	0.5	moderate_subsidence	greenhouse	pangaea
Chugwater Group	Mesozoic	\N	fluvial_channel	0.5	moderate_subsidence	greenhouse	pangaea
Chugwater Group	Mesozoic	\N	fluvial_channel	0.5	moderate_subsidence	greenhouse	pangaea
Chugwater Group	Mesozoic	\N	fluvial_channel	0.5	moderate_subsidence	greenhouse	pangaea
Chugwater Group	Mesozoic	\N	fluvial_channel	0.75	moderate_subsidence	greenhouse	pangaea
Chugwater Group	Mesozoic	\N	fluvial_channel	0.75	moderate_subsidence	greenhouse	pangaea
Chugwater Group	Mesozoic	\N	fluvial_channel	0.75	moderate_subsidence	greenhouse	pangaea
Chugwater Group	Mesozoic	\N	fluvial_channel	1.5	moderate_subsidence	greenhouse	pangaea
Chugwater Group	Mesozoic	\N	fluvial_channel	0.5	moderate_subsidence	greenhouse	pangaea
Chugwater Group	Mesozoic	\N	fluvial_channel	0.5	moderate_subsidence	greenhouse	pangaea
Chugwater Group	Mesozoic	\N	fluvial_channel	1.75	moderate_subsidence	greenhouse	pangaea
Chugwater Group	Mesozoic	\N	fluvial_channel	2	moderate_subsidence	greenhouse	pangaea
Chugwater Group	Mesozoic	\N	fluvial_channel	0.75	moderate_subsidence	greenhouse	pangaea
Chugwater Group	Mesozoic	\N	fluvial_channel	0.75	moderate_subsidence	greenhouse	pangaea
Chugwater Group	Mesozoic	\N	fluvial_channel	2.5	moderate_subsidence	greenhouse	pangaea
Chugwater Group	Mesozoic	\N	fluvial_sandstone	0.5	moderate_subsidence	greenhouse	pangaea
Chugwater Group	Mesozoic	\N	fluvial_sandstone	1.5	moderate_subsidence	greenhouse	pangaea
Chugwater Group	Mesozoic	\N	fluvial_sandstone	1.5	moderate_subsidence	greenhouse	pangaea
Chugwater Group	Mesozoic	\N	fluvial_sandstone	0.5	moderate_subsidence	greenhouse	pangaea
Chugwater Group	Mesozoic	\N	fluvial_sandstone	0.75	moderate_subsidence	greenhouse	pangaea
Chugwater Group	Mesozoic	\N	fluvial_sandstone	0.75	moderate_subsidence	greenhouse	pangaea
Chugwater Group	Mesozoic	\N	fluvial_sandstone	1.25	moderate_subsidence	greenhouse	pangaea
Chugwater Group	Mesozoic	\N	fluvial_sandstone	0.75	moderate_subsidence	greenhouse	pangaea
Chugwater Group	Mesozoic	\N	fluvial_sandstone	5	moderate_subsidence	greenhouse	pangaea
Chugwater Group	Mesozoic	\N	marine_carbonates	1.5	moderate_subsidence	greenhouse	pangaea
Chugwater Group	Mesozoic	\N	marine_carbonates	1.5	moderate_subsidence	greenhouse	pangaea
Chugwater Group	Mesozoic	\N	marine_carbonates	1	moderate_subsidence	greenhouse	pangaea
Chugwater Group	Mesozoic	\N	marine_carbonates	1	moderate_subsidence	greenhouse	pangaea
Chugwater Group	Mesozoic	\N	marine_carbonates	1	moderate_subsidence	greenhouse	pangaea
Chugwater Group	Mesozoic	\N	marine_carbonates	2	moderate_subsidence	greenhouse	pangaea
Chugwater Group	Mesozoic	\N	marine_carbonates	4	moderate_subsidence	greenhouse	pangaea
Chugwater Group	Mesozoic	\N	marine_carbonates	0.25	moderate_subsidence	greenhouse	pangaea
Chugwater Group	Mesozoic	\N	non-channelized_fluvial_deposits	0.5	moderate_subsidence	greenhouse	pangaea
Chugwater Group	Mesozoic	\N	non-channelized_fluvial_deposits	0.75	moderate_subsidence	greenhouse	pangaea
Chugwater Group	Mesozoic	\N	non-channelized_fluvial_deposits	0.5	moderate_subsidence	greenhouse	pangaea
Chugwater Group	Mesozoic	\N	non-channelized_fluvial_deposits	0.5	moderate_subsidence	greenhouse	pangaea
Chugwater Group	Mesozoic	\N	non-channelized_fluvial_deposits	2	moderate_subsidence	greenhouse	pangaea
Chugwater Group	Mesozoic	\N	non-channelized_fluvial_deposits	0.25	moderate_subsidence	greenhouse	pangaea
Chugwater Group	Mesozoic	\N	non-channelized_fluvial_deposits	0.75	moderate_subsidence	greenhouse	pangaea
Chugwater Group	Mesozoic	\N	non-channelized_fluvial_deposits	0.75	moderate_subsidence	greenhouse	pangaea
Chugwater Group	Mesozoic	\N	non-channelized_fluvial_deposits	0.75	moderate_subsidence	greenhouse	pangaea
Chugwater Group	Mesozoic	\N	non-channelized_fluvial_deposits	0.75	moderate_subsidence	greenhouse	pangaea
Chugwater Group	Mesozoic	\N	non-channelized_fluvial_deposits	1.5	moderate_subsidence	greenhouse	pangaea
Chugwater Group	Mesozoic	\N	non-channelized_fluvial_deposits	1.5	moderate_subsidence	greenhouse	pangaea
Chugwater Group	Mesozoic	\N	non-channelized_fluvial_deposits	0.25	moderate_subsidence	greenhouse	pangaea
Chugwater Group	Mesozoic	\N	non-channelized_fluvial_deposits	1.5	moderate_subsidence	greenhouse	pangaea
Chugwater Group	Mesozoic	\N	non-channelized_fluvial_deposits	1.5	moderate_subsidence	greenhouse	pangaea
Chugwater Group	Mesozoic	\N	sabkha_and_playa_lake	3	moderate_subsidence	greenhouse	pangaea
Chugwater Group	Mesozoic	\N	sabkha_and_playa_lake	5	moderate_subsidence	greenhouse	pangaea
Chugwater Group	Mesozoic	\N	sabkha_and_playa_lake	5	moderate_subsidence	greenhouse	pangaea
Chugwater Group	Mesozoic	\N	sabkha_and_playa_lake	6	moderate_subsidence	greenhouse	pangaea
Chugwater Group	Mesozoic	\N	sabkha_and_playa_lake	2	moderate_subsidence	greenhouse	pangaea
Chugwater Group	Mesozoic	\N	sabkha_and_playa_lake	6	moderate_subsidence	greenhouse	pangaea
Chugwater Group	Mesozoic	\N	sabkha_and_playa_lake	2.5	moderate_subsidence	greenhouse	pangaea
Chugwater Group	Mesozoic	\N	sabkha_and_playa_lake	0.25	moderate_subsidence	greenhouse	pangaea
Chugwater Group	Mesozoic	\N	sabkha_and_playa_lake	0.25	moderate_subsidence	greenhouse	pangaea
Chugwater Group	Mesozoic	\N	sabkha_and_playa_lake	0.75	moderate_subsidence	greenhouse	pangaea
Chugwater Group	Mesozoic	\N	sabkha_and_playa_lake	0.25	moderate_subsidence	greenhouse	pangaea
Chugwater Group	Mesozoic	\N	sabkha_and_playa_lake	2	moderate_subsidence	greenhouse	pangaea
Sherwood Sandstone	Mesozoic	\N	\N	3	moderate_subsidence	icehouse	pangaea
Sherwood Sandstone	Mesozoic	\N	fluvial_channel	12	moderate_subsidence	icehouse	pangaea
Sherwood Sandstone	Mesozoic	\N	fluvial_channel	2	moderate_subsidence	icehouse	pangaea
Sherwood Sandstone	Mesozoic	\N	fluvial_channel	6	moderate_subsidence	icehouse	pangaea
Sherwood Sandstone	Mesozoic	\N	fluvial_channel	4	moderate_subsidence	icehouse	pangaea
Sherwood Sandstone	Mesozoic	\N	fluvial_channel	7	moderate_subsidence	icehouse	pangaea
Sherwood Sandstone	Mesozoic	\N	fluvial_channel	2	moderate_subsidence	icehouse	pangaea
Sherwood Sandstone	Mesozoic	\N	fluvial_channel	3	moderate_subsidence	icehouse	pangaea
Sherwood Sandstone	Mesozoic	\N	fluvial_channel	12	moderate_subsidence	icehouse	pangaea
Sherwood Sandstone	Mesozoic	\N	fluvial_channel	10	moderate_subsidence	icehouse	pangaea
Sherwood Sandstone	Mesozoic	\N	fluvial_channel	12	moderate_subsidence	icehouse	pangaea
Sherwood Sandstone	Mesozoic	\N	fluvial_channel	27	moderate_subsidence	icehouse	pangaea
Sherwood Sandstone	Mesozoic	\N	fluvial_channel	10	moderate_subsidence	icehouse	pangaea
Sherwood Sandstone	Mesozoic	\N	fluvial_channel	5	moderate_subsidence	icehouse	pangaea
Sherwood Sandstone	Mesozoic	\N	fluvial_channel	12	moderate_subsidence	icehouse	pangaea
Sherwood Sandstone	Mesozoic	\N	fluvial_channel	5	moderate_subsidence	icehouse	pangaea
Sherwood Sandstone	Mesozoic	\N	fluvial_channel	27	moderate_subsidence	icehouse	pangaea
Sherwood Sandstone	Mesozoic	\N	fluvial_channel	12	moderate_subsidence	icehouse	pangaea
Sherwood Sandstone	Mesozoic	\N	fluvial_channel	4	moderate_subsidence	icehouse	pangaea
Sherwood Sandstone	Mesozoic	\N	fluvial_channel	10	moderate_subsidence	icehouse	pangaea
Sherwood Sandstone	Mesozoic	\N	fluvial_channel	5	moderate_subsidence	icehouse	pangaea
Sherwood Sandstone	Mesozoic	\N	fluvial_channel	1	moderate_subsidence	icehouse	pangaea
Sherwood Sandstone	Mesozoic	\N	fluvial_channel	10	moderate_subsidence	icehouse	pangaea
Sherwood Sandstone	Mesozoic	\N	fluvial_channel,fluvial_sandstone	22	moderate_subsidence	icehouse	pangaea
Sherwood Sandstone	Mesozoic	\N	fluvial_channel,fluvial_sandstone	5	moderate_subsidence	icehouse	pangaea
Sherwood Sandstone	Mesozoic	\N	fluvial_channel,fluvial_sandstone	2.5	moderate_subsidence	icehouse	pangaea
Sherwood Sandstone	Mesozoic	\N	fluvial_channel,fluvial_sandstone	11	moderate_subsidence	icehouse	pangaea
Sherwood Sandstone	Mesozoic	\N	fluvial_channel,fluvial_sandstone	2	moderate_subsidence	icehouse	pangaea
Sherwood Sandstone	Mesozoic	\N	fluvial_channel,fluvial_sandstone	3.5	moderate_subsidence	icehouse	pangaea
Sherwood Sandstone	Mesozoic	\N	fluvial_channel,fluvial_sandstone	2.5	moderate_subsidence	icehouse	pangaea
Sherwood Sandstone	Mesozoic	\N	fluvial_channel,fluvial_sandstone	2	moderate_subsidence	icehouse	pangaea
Sherwood Sandstone	Mesozoic	\N	fluvial_channel,fluvial_sandstone	25	moderate_subsidence	icehouse	pangaea
Sherwood Sandstone	Mesozoic	\N	fluvial_mudstone,non-channelized_fluvial_deposits	2	moderate_subsidence	icehouse	pangaea
Sherwood Sandstone	Mesozoic	\N	fluvial_mudstone,non-channelized_fluvial_deposits	2	moderate_subsidence	icehouse	pangaea
Sherwood Sandstone	Mesozoic	\N	fluvial_mudstone,non-channelized_fluvial_deposits	2	moderate_subsidence	icehouse	pangaea
Sherwood Sandstone	Mesozoic	\N	fluvial_mudstone,non-channelized_fluvial_deposits	2	moderate_subsidence	icehouse	pangaea
Sherwood Sandstone	Mesozoic	\N	fluvial_mudstone,non-channelized_fluvial_deposits	5	moderate_subsidence	icehouse	pangaea
Sherwood Sandstone	Mesozoic	\N	fluvial_mudstone,non-channelized_fluvial_deposits	2	moderate_subsidence	icehouse	pangaea
Sherwood Sandstone	Mesozoic	\N	fluvial_mudstone,non-channelized_fluvial_deposits	2	moderate_subsidence	icehouse	pangaea
Sherwood Sandstone	Mesozoic	\N	fluvial_mudstone,non-channelized_fluvial_deposits	2	moderate_subsidence	icehouse	pangaea
Sherwood Sandstone	Mesozoic	\N	fluvial_mudstone,non-channelized_fluvial_deposits	2	moderate_subsidence	icehouse	pangaea
Sherwood Sandstone	Mesozoic	\N	fluvial_mudstone,non-channelized_fluvial_deposits	2	moderate_subsidence	icehouse	pangaea
Sherwood Sandstone	Mesozoic	\N	fluvial_sandstone,non-channelized_fluvial_deposits	8	moderate_subsidence	icehouse	pangaea
Sherwood Sandstone	Mesozoic	\N	fluvial_sandstone,non-channelized_fluvial_deposits	8	moderate_subsidence	icehouse	pangaea
Sherwood Sandstone	Mesozoic	\N	fluvial_sandstone,non-channelized_fluvial_deposits	12	moderate_subsidence	icehouse	pangaea
Sherwood Sandstone	Mesozoic	\N	fluvial_sandstone,non-channelized_fluvial_deposits	12	moderate_subsidence	icehouse	pangaea
Sherwood Sandstone	Mesozoic	\N	fluvial_sandstone,non-channelized_fluvial_deposits	2	moderate_subsidence	icehouse	pangaea
Sherwood Sandstone	Mesozoic	\N	fluvial_sandstone,non-channelized_fluvial_deposits	5	moderate_subsidence	icehouse	pangaea
Sherwood Sandstone	Mesozoic	\N	fluvial_sandstone,non-channelized_fluvial_deposits	4	moderate_subsidence	icehouse	pangaea
Sherwood Sandstone	Mesozoic	\N	fluvial_sandstone,non-channelized_fluvial_deposits	4	moderate_subsidence	icehouse	pangaea
Sherwood Sandstone	Mesozoic	\N	fluvial_sandstone,non-channelized_fluvial_deposits	4	moderate_subsidence	icehouse	pangaea
Sherwood Sandstone	Mesozoic	\N	fluvial_sandstone,non-channelized_fluvial_deposits	8	moderate_subsidence	icehouse	pangaea
Sherwood Sandstone	Mesozoic	\N	fluvial_sandstone,non-channelized_fluvial_deposits	8	moderate_subsidence	icehouse	pangaea
Sherwood Sandstone	Mesozoic	\N	fluvial_sandstone,non-channelized_fluvial_deposits	9	moderate_subsidence	icehouse	pangaea
Sherwood Sandstone	Mesozoic	\N	fluvial_sandstone,non-channelized_fluvial_deposits	10	moderate_subsidence	icehouse	pangaea
Sherwood Sandstone	Mesozoic	\N	fluvial_sandstone,non-channelized_fluvial_deposits	9	moderate_subsidence	icehouse	pangaea
Sherwood Sandstone	Mesozoic	\N	fluvial_sandstone,non-channelized_fluvial_deposits	5	moderate_subsidence	icehouse	pangaea
Sherwood Sandstone	Mesozoic	\N	fluvial_sandstone,non-channelized_fluvial_deposits	2	moderate_subsidence	icehouse	pangaea
Sherwood Sandstone	Mesozoic	\N	fluvial_sandstone,non-channelized_fluvial_deposits	1	moderate_subsidence	icehouse	pangaea
Sherwood Sandstone	Mesozoic	\N	fluvial_sandstone,non-channelized_fluvial_deposits	2	moderate_subsidence	icehouse	pangaea
Sherwood Sandstone	Mesozoic	\N	fluvial_sandstone,non-channelized_fluvial_deposits	2	moderate_subsidence	icehouse	pangaea
Sherwood Sandstone	Mesozoic	\N	fluvial_sandstone,non-channelized_fluvial_deposits	0.5	moderate_subsidence	icehouse	pangaea
Sherwood Sandstone	Mesozoic	\N	fluvial_sandstone,non-channelized_fluvial_deposits	1	moderate_subsidence	icehouse	pangaea
Sherwood Sandstone	Mesozoic	\N	fluvial_sandstone,non-channelized_fluvial_deposits	8	moderate_subsidence	icehouse	pangaea
Sherwood Sandstone	Mesozoic	\N	fluvial_sandstone,non-channelized_fluvial_deposits	3	moderate_subsidence	icehouse	pangaea
Sherwood Sandstone	Mesozoic	\N	fluvial_sandstone,non-channelized_fluvial_deposits	1.5	moderate_subsidence	icehouse	pangaea
Sherwood Sandstone	Mesozoic	\N	fluvial_sandstone,non-channelized_fluvial_deposits	0.5	moderate_subsidence	icehouse	pangaea
Sherwood Sandstone	Mesozoic	\N	fluvial_sandstone,non-channelized_fluvial_deposits	1	moderate_subsidence	icehouse	pangaea
Sherwood Sandstone	Mesozoic	\N	fluvial_sandstone,non-channelized_fluvial_deposits	1	moderate_subsidence	icehouse	pangaea
Sherwood Sandstone	Mesozoic	\N	fluvial_sandstone,non-channelized_fluvial_deposits	0.5	moderate_subsidence	icehouse	pangaea
Sherwood Sandstone	Mesozoic	\N	fluvial_sandstone,non-channelized_fluvial_deposits	1	moderate_subsidence	icehouse	pangaea
Sherwood Sandstone	Mesozoic	\N	fluvial_sandstone,non-channelized_fluvial_deposits	0.5	moderate_subsidence	icehouse	pangaea
Sherwood Sandstone	Mesozoic	\N	fluvial_sandstone,non-channelized_fluvial_deposits	1	moderate_subsidence	icehouse	pangaea
Sherwood Sandstone	Mesozoic	\N	fluvial_sandstone,non-channelized_fluvial_deposits	0.5	moderate_subsidence	icehouse	pangaea
Sherwood Sandstone	Mesozoic	\N	fluvial_sandstone,non-channelized_fluvial_deposits	0.5	moderate_subsidence	icehouse	pangaea
Sherwood Sandstone	Mesozoic	\N	fluvial_sandstone,non-channelized_fluvial_deposits	1.5	moderate_subsidence	icehouse	pangaea
Sherwood Sandstone	Mesozoic	\N	fluvial_sandstone,non-channelized_fluvial_deposits	1.5	moderate_subsidence	icehouse	pangaea
Sherwood Sandstone	Mesozoic	\N	fluvial_sandstone,non-channelized_fluvial_deposits	1	moderate_subsidence	icehouse	pangaea
Sherwood Sandstone	Mesozoic	\N	fluvial_sandstone,non-channelized_fluvial_deposits	1	moderate_subsidence	icehouse	pangaea
Sherwood Sandstone	Mesozoic	\N	fluvial_sandstone,non-channelized_fluvial_deposits	2	moderate_subsidence	icehouse	pangaea
Sherwood Sandstone	Mesozoic	\N	fluvial_sandstone,non-channelized_fluvial_deposits	3	moderate_subsidence	icehouse	pangaea
Sherwood Sandstone	Mesozoic	\N	fluvial_sandstone,non-channelized_fluvial_deposits	5	moderate_subsidence	icehouse	pangaea
Sherwood Sandstone	Mesozoic	\N	fluvial_sandstone,non-channelized_fluvial_deposits	1.5	moderate_subsidence	icehouse	pangaea
Sherwood Sandstone	Mesozoic	\N	fluvial_sandstone,non-channelized_fluvial_deposits	1.5	moderate_subsidence	icehouse	pangaea
Sherwood Sandstone	Mesozoic	\N	fluvial_sandstone,non-channelized_fluvial_deposits	0.5	moderate_subsidence	icehouse	pangaea
Sherwood Sandstone	Mesozoic	\N	fluvial_sandstone,non-channelized_fluvial_deposits	1	moderate_subsidence	icehouse	pangaea
Sherwood Sandstone	Mesozoic	\N	fluvial_sandstone,non-channelized_fluvial_deposits	4	moderate_subsidence	icehouse	pangaea
Sherwood Sandstone	Mesozoic	\N	fluvial_sandstone,non-channelized_fluvial_deposits	1.5	moderate_subsidence	icehouse	pangaea
Sherwood Sandstone	Mesozoic	\N	fluvial_sandstone,non-channelized_fluvial_deposits	6	moderate_subsidence	icehouse	pangaea
Sherwood Sandstone	Mesozoic	\N	sabkha_and_playa_lake	1.5	moderate_subsidence	icehouse	pangaea
Sherwood Sandstone	Mesozoic	\N	sabkha_and_playa_lake	1.5	moderate_subsidence	icehouse	pangaea
Page Sandstone	Mesozoic	\N	fluvial_channel	4.5	moderate_subsidence	greenhouse	none
Page Sandstone	Mesozoic	\N	fluvial_channel	9	moderate_subsidence	greenhouse	none
Page Sandstone	Mesozoic	\N	paleosol	0.5	moderate_subsidence	greenhouse	none
Page Sandstone	Mesozoic	\N	paleosol	0.5	moderate_subsidence	greenhouse	none
Sergi Formation	Mesozoic	\N	fluvial_channel	2	moderate_subsidence	greenhouse	west_gondwanaland
Sergi Formation	Mesozoic	\N	fluvial_channel	2.5	moderate_subsidence	greenhouse	west_gondwanaland
Entrada Sandstone	Mesozoic	\N	lacustine_carbonates	3	moderate_subsidence	greenhouse	pangaea
Entrada Sandstone	Mesozoic	\N	precipitates	17.5	moderate_subsidence	greenhouse	pangaea
Sergi Formation	Mesozoic	\N	\N	2.5	moderate_subsidence	greenhouse	west_gondwanaland
Sergi Formation	Mesozoic	\N	\N	15	moderate_subsidence	greenhouse	west_gondwanaland
Sergi Formation	Mesozoic	\N	fluvial_channel	5	moderate_subsidence	greenhouse	west_gondwanaland
Entrada Sandstone	Mesozoic	\N	lacustine_carbonates	5	moderate_subsidence	greenhouse	pangaea
Entrada Sandstone	Mesozoic	\N	lacustrine_siliciclastics	17	moderate_subsidence	greenhouse	pangaea
Entrada Sandstone	Mesozoic	\N	lacustrine_siliciclastics	40	moderate_subsidence	greenhouse	pangaea
Entrada Sandstone	Mesozoic	\N	sabkha_and_playa_lake	5	moderate_subsidence	greenhouse	pangaea
Entrada Sandstone	Mesozoic	\N	sabkha_and_playa_lake	5	moderate_subsidence	greenhouse	pangaea
Entrada Sandstone	Mesozoic	\N	sabkha_and_playa_lake	3	moderate_subsidence	greenhouse	pangaea
Entrada Sandstone	Mesozoic	\N	sabkha_and_playa_lake	2	moderate_subsidence	greenhouse	pangaea
Entrada Sandstone	Mesozoic	\N	sabkha_and_playa_lake	2	moderate_subsidence	greenhouse	pangaea
Entrada Sandstone	Mesozoic	\N	sabkha_and_playa_lake	3	moderate_subsidence	greenhouse	pangaea
Entrada Sandstone	Mesozoic	\N	sabkha_and_playa_lake	5	moderate_subsidence	greenhouse	pangaea
Entrada Sandstone	Mesozoic	\N	sabkha_and_playa_lake	2	moderate_subsidence	greenhouse	pangaea
Entrada Sandstone	Mesozoic	\N	sabkha_and_playa_lake	2	moderate_subsidence	greenhouse	pangaea
Entrada Sandstone	Mesozoic	\N	sabkha_and_playa_lake	4	moderate_subsidence	greenhouse	pangaea
Page Sandstone	Mesozoic	\N	marine_carbonates,sabkha_and_playa_lake	0.75	moderate_subsidence	greenhouse	none
Page Sandstone	Mesozoic	\N	marine_carbonates,sabkha_and_playa_lake	1.5	moderate_subsidence	greenhouse	none
Page Sandstone	Mesozoic	\N	sabkha_and_playa_lake	2.25	moderate_subsidence	greenhouse	none
Page Sandstone	Mesozoic	\N	sabkha_and_playa_lake	2.25	moderate_subsidence	greenhouse	none
Page Sandstone	Mesozoic	\N	sabkha_and_playa_lake	1.5	moderate_subsidence	greenhouse	none
Page Sandstone	Mesozoic	\N	sabkha_and_playa_lake	0.375	moderate_subsidence	greenhouse	none
Page Sandstone	Mesozoic	\N	sabkha_and_playa_lake	0.375	moderate_subsidence	greenhouse	none
Page Sandstone	Mesozoic	\N	sabkha_and_playa_lake	0.375	moderate_subsidence	greenhouse	none
Page Sandstone	Mesozoic	\N	sabkha_and_playa_lake	0.375	moderate_subsidence	greenhouse	none
Page Sandstone	Mesozoic	\N	sabkha_and_playa_lake	0.15	moderate_subsidence	greenhouse	none
Page Sandstone	Mesozoic	\N	sabkha_and_playa_lake	0.375	moderate_subsidence	greenhouse	none
Page Sandstone	Mesozoic	\N	sabkha_and_playa_lake	1.5	moderate_subsidence	greenhouse	none
Huitrin Formation	Mesozoic	compound_set	\N	33	moderate_subsidence	greenhouse	none
Huitrin Formation	Mesozoic	compound_set	\N	21	moderate_subsidence	greenhouse	none
Entrada Sandstone	Mesozoic	compound_set	\N	15	moderate_subsidence	greenhouse	pangaea
Entrada Sandstone	Mesozoic	compound_set	\N	7	moderate_subsidence	greenhouse	pangaea
Entrada Sandstone	Mesozoic	compound_set	\N	3	moderate_subsidence	greenhouse	pangaea
Entrada Sandstone	Mesozoic	compound_set	\N	8	moderate_subsidence	greenhouse	pangaea
Entrada Sandstone	Mesozoic	compound_set	\N	3	moderate_subsidence	greenhouse	pangaea
Entrada Sandstone	Mesozoic	compound_set	\N	34.5	moderate_subsidence	greenhouse	pangaea
Entrada Sandstone	Mesozoic	compound_set	\N	30	moderate_subsidence	greenhouse	pangaea
Entrada Sandstone	Mesozoic	compound_set	\N	7.5	moderate_subsidence	greenhouse	pangaea
Page Sandstone	Mesozoic	compound_set	\N	8	moderate_subsidence	greenhouse	none
Page Sandstone	Mesozoic	compound_set	\N	12	moderate_subsidence	greenhouse	none
Page Sandstone	Mesozoic	compound_set	\N	10	moderate_subsidence	greenhouse	none
Page Sandstone	Mesozoic	compound_set	\N	26	moderate_subsidence	greenhouse	none
Agrio Formation	Mesozoic	coset	\N	9	moderate_subsidence	greenhouse	none
Agrio Formation	Mesozoic	coset	\N	2.8	moderate_subsidence	greenhouse	none
Agrio Formation	Mesozoic	coset	\N	3	moderate_subsidence	greenhouse	none
Agrio Formation	Mesozoic	coset	\N	3	moderate_subsidence	greenhouse	none
Agrio Formation	Mesozoic	coset	\N	3	moderate_subsidence	greenhouse	none
Sao Sebastio Formation	Mesozoic	coset	\N	1	moderate_subsidence	greenhouse	west_gondwanaland
Sao Sebastio Formation	Mesozoic	coset	\N	2	moderate_subsidence	greenhouse	west_gondwanaland
Sao Sebastio Formation	Mesozoic	coset	\N	0.75	moderate_subsidence	greenhouse	west_gondwanaland
Sao Sebastio Formation	Mesozoic	coset	\N	2	moderate_subsidence	greenhouse	west_gondwanaland
Sao Sebastio Formation	Mesozoic	coset	\N	20	moderate_subsidence	greenhouse	west_gondwanaland
Sergi Formation	Mesozoic	coset	\N	4.5	moderate_subsidence	greenhouse	west_gondwanaland
Sergi Formation	Mesozoic	coset	\N	3	moderate_subsidence	greenhouse	west_gondwanaland
Sergi Formation	Mesozoic	coset	\N	6	moderate_subsidence	greenhouse	west_gondwanaland
Sergi Formation	Mesozoic	coset	\N	3	moderate_subsidence	greenhouse	west_gondwanaland
Sergi Formation	Mesozoic	coset	\N	5.5	moderate_subsidence	greenhouse	west_gondwanaland
Entrada Sandstone	Mesozoic	coset	\N	28.75	moderate_subsidence	greenhouse	pangaea
Entrada Sandstone	Mesozoic	coset	\N	30	moderate_subsidence	greenhouse	pangaea
Entrada Sandstone	Mesozoic	coset	\N	4	moderate_subsidence	greenhouse	pangaea
Entrada Sandstone	Mesozoic	coset	\N	4	moderate_subsidence	greenhouse	pangaea
Entrada Sandstone	Mesozoic	coset	\N	20	moderate_subsidence	greenhouse	pangaea
Entrada Sandstone	Mesozoic	coset	\N	10	moderate_subsidence	greenhouse	pangaea
Huitrin Formation	Mesozoic	cross-strata_package	\N	4	moderate_subsidence	greenhouse	none
Huitrin Formation	Mesozoic	cross-strata_package	\N	3	moderate_subsidence	greenhouse	none
Huitrin Formation	Mesozoic	cross-strata_package	\N	8	moderate_subsidence	greenhouse	none
Huitrin Formation	Mesozoic	cross-strata_package	\N	1.5	moderate_subsidence	greenhouse	none
Huitrin Formation	Mesozoic	cross-strata_package	\N	0.5	moderate_subsidence	greenhouse	none
Huitrin Formation	Mesozoic	cross-strata_package	\N	1	moderate_subsidence	greenhouse	none
Huitrin Formation	Mesozoic	cross-strata_package	\N	1.5	moderate_subsidence	greenhouse	none
Huitrin Formation	Mesozoic	cross-strata_package	\N	3.5	moderate_subsidence	greenhouse	none
Huitrin Formation	Mesozoic	cross-strata_package	\N	0.5	moderate_subsidence	greenhouse	none
Huitrin Formation	Mesozoic	cross-strata_package	\N	4	moderate_subsidence	greenhouse	none
Huitrin Formation	Mesozoic	cross-strata_package	\N	1.5	moderate_subsidence	greenhouse	none
Sao Sebastio Formation	Mesozoic	cross-strata_package	\N	0.45	moderate_subsidence	greenhouse	west_gondwanaland
Sao Sebastio Formation	Mesozoic	cross-strata_package	\N	0.45	moderate_subsidence	greenhouse	west_gondwanaland
Sao Sebastio Formation	Mesozoic	cross-strata_package	\N	0.35	moderate_subsidence	greenhouse	west_gondwanaland
Sao Sebastio Formation	Mesozoic	cross-strata_package	\N	0.35	moderate_subsidence	greenhouse	west_gondwanaland
Sao Sebastio Formation	Mesozoic	cross-strata_package	\N	0.25	moderate_subsidence	greenhouse	west_gondwanaland
Sao Sebastio Formation	Mesozoic	cross-strata_package	\N	0.25	moderate_subsidence	greenhouse	west_gondwanaland
Sao Sebastio Formation	Mesozoic	cross-strata_package	\N	0.1	moderate_subsidence	greenhouse	west_gondwanaland
Sao Sebastio Formation	Mesozoic	cross-strata_package	\N	0.25	moderate_subsidence	greenhouse	west_gondwanaland
Sao Sebastio Formation	Mesozoic	cross-strata_package	\N	0.25	moderate_subsidence	greenhouse	west_gondwanaland
Sao Sebastio Formation	Mesozoic	cross-strata_package	\N	0.25	moderate_subsidence	greenhouse	west_gondwanaland
Sao Sebastio Formation	Mesozoic	cross-strata_package	\N	0.25	moderate_subsidence	greenhouse	west_gondwanaland
Sao Sebastio Formation	Mesozoic	cross-strata_package	\N	8	moderate_subsidence	greenhouse	west_gondwanaland
Sao Sebastio Formation	Mesozoic	cross-strata_package	\N	2	moderate_subsidence	greenhouse	west_gondwanaland
Sao Sebastio Formation	Mesozoic	cross-strata_package	\N	10	moderate_subsidence	greenhouse	west_gondwanaland
Sao Sebastio Formation	Mesozoic	cross-strata_package	\N	15	moderate_subsidence	greenhouse	west_gondwanaland
Sao Sebastio Formation	Mesozoic	cross-strata_package	\N	10	moderate_subsidence	greenhouse	west_gondwanaland
Sao Sebastio Formation	Mesozoic	cross-strata_package	\N	1.25	moderate_subsidence	greenhouse	west_gondwanaland
Sao Sebastio Formation	Mesozoic	cross-strata_package	\N	1	moderate_subsidence	greenhouse	west_gondwanaland
Sao Sebastio Formation	Mesozoic	cross-strata_package	\N	0.8	moderate_subsidence	greenhouse	west_gondwanaland
Sao Sebastio Formation	Mesozoic	cross-strata_package	\N	1	moderate_subsidence	greenhouse	west_gondwanaland
Sao Sebastio Formation	Mesozoic	cross-strata_package	\N	0.25	moderate_subsidence	greenhouse	west_gondwanaland
Sao Sebastio Formation	Mesozoic	cross-strata_package	\N	0.6	moderate_subsidence	greenhouse	west_gondwanaland
Sao Sebastio Formation	Mesozoic	cross-strata_package	\N	0.25	moderate_subsidence	greenhouse	west_gondwanaland
Sao Sebastio Formation	Mesozoic	cross-strata_package	\N	0.25	moderate_subsidence	greenhouse	west_gondwanaland
Sergi Formation	Mesozoic	cross-strata_package	\N	5	moderate_subsidence	greenhouse	west_gondwanaland
Entrada Sandstone	Mesozoic	cross-strata_package	\N	4	moderate_subsidence	greenhouse	pangaea
Entrada Sandstone	Mesozoic	cross-strata_package	\N	5	moderate_subsidence	greenhouse	pangaea
Entrada Sandstone	Mesozoic	cross-strata_package	\N	5	moderate_subsidence	greenhouse	pangaea
Entrada Sandstone	Mesozoic	cross-strata_package	\N	5	moderate_subsidence	greenhouse	pangaea
Entrada Sandstone	Mesozoic	cross-strata_package	\N	1.2	moderate_subsidence	greenhouse	pangaea
Entrada Sandstone	Mesozoic	cross-strata_package	\N	2.6	moderate_subsidence	greenhouse	pangaea
Entrada Sandstone	Mesozoic	cross-strata_package	\N	2	moderate_subsidence	greenhouse	pangaea
Entrada Sandstone	Mesozoic	cross-strata_package	\N	0.8	moderate_subsidence	greenhouse	pangaea
Entrada Sandstone	Mesozoic	cross-strata_package	\N	0.8	moderate_subsidence	greenhouse	pangaea
Entrada Sandstone	Mesozoic	cross-strata_package	\N	1.6	moderate_subsidence	greenhouse	pangaea
Entrada Sandstone	Mesozoic	cross-strata_package	\N	2.8	moderate_subsidence	greenhouse	pangaea
Entrada Sandstone	Mesozoic	cross-strata_package	\N	0.25	moderate_subsidence	greenhouse	pangaea
Entrada Sandstone	Mesozoic	cross-strata_package	\N	0.25	moderate_subsidence	greenhouse	pangaea
Entrada Sandstone	Mesozoic	cross-strata_package	\N	0.25	moderate_subsidence	greenhouse	pangaea
Entrada Sandstone	Mesozoic	cross-strata_package	\N	1.6	moderate_subsidence	greenhouse	pangaea
Entrada Sandstone	Mesozoic	cross-strata_package	\N	1.6	moderate_subsidence	greenhouse	pangaea
Entrada Sandstone	Mesozoic	cross-strata_package	\N	0.6	moderate_subsidence	greenhouse	pangaea
Entrada Sandstone	Mesozoic	cross-strata_package	\N	1.2	moderate_subsidence	greenhouse	pangaea
Sergi Formation	Mesozoic	cross-strata_package	\N	5	moderate_subsidence	greenhouse	west_gondwanaland
Sergi Formation	Mesozoic	cross-strata_package	\N	2.5	moderate_subsidence	greenhouse	west_gondwanaland
Sergi Formation	Mesozoic	cross-strata_package	\N	2.5	moderate_subsidence	greenhouse	west_gondwanaland
Sergi Formation	Mesozoic	cross-strata_package	\N	2.5	moderate_subsidence	greenhouse	west_gondwanaland
Sergi Formation	Mesozoic	cross-strata_package	\N	4	moderate_subsidence	greenhouse	west_gondwanaland
Sergi Formation	Mesozoic	cross-strata_package	\N	3	moderate_subsidence	greenhouse	west_gondwanaland
Sergi Formation	Mesozoic	cross-strata_package	\N	5.5	moderate_subsidence	greenhouse	west_gondwanaland
Sergi Formation	Mesozoic	cross-strata_package	\N	7	moderate_subsidence	greenhouse	west_gondwanaland
Sergi Formation	Mesozoic	cross-strata_package	\N	3	moderate_subsidence	greenhouse	west_gondwanaland
Sergi Formation	Mesozoic	cross-strata_package	\N	3	moderate_subsidence	greenhouse	west_gondwanaland
Sergi Formation	Mesozoic	dune	\N	3.75	moderate_subsidence	greenhouse	west_gondwanaland
Entrada Sandstone	Mesozoic	dune	\N	5	moderate_subsidence	greenhouse	pangaea
Entrada Sandstone	Mesozoic	dune	\N	5	moderate_subsidence	greenhouse	pangaea
Entrada Sandstone	Mesozoic	dune	\N	5	moderate_subsidence	greenhouse	pangaea
Entrada Sandstone	Mesozoic	dune	\N	6.25	moderate_subsidence	greenhouse	pangaea
Entrada Sandstone	Mesozoic	dune	\N	35	moderate_subsidence	greenhouse	pangaea
Entrada Sandstone	Mesozoic	dune	\N	20	moderate_subsidence	greenhouse	pangaea
Entrada Sandstone	Mesozoic	dune	\N	15	moderate_subsidence	greenhouse	pangaea
Entrada Sandstone	Mesozoic	dune	\N	34.5	moderate_subsidence	greenhouse	pangaea
Entrada Sandstone	Mesozoic	dune	\N	34.5	moderate_subsidence	greenhouse	pangaea
Sergi Formation	Mesozoic	dune,sandsheet_undifferentiated	\N	2	moderate_subsidence	greenhouse	west_gondwanaland
Sergi Formation	Mesozoic	dune,sandsheet_undifferentiated	\N	1.5	moderate_subsidence	greenhouse	west_gondwanaland
Sergi Formation	Mesozoic	dune,sandsheet_undifferentiated	\N	2	moderate_subsidence	greenhouse	west_gondwanaland
Sergi Formation	Mesozoic	dune,sandsheet_undifferentiated	\N	1	moderate_subsidence	greenhouse	west_gondwanaland
Sergi Formation	Mesozoic	dune,sandsheet_undifferentiated	\N	2	moderate_subsidence	greenhouse	west_gondwanaland
Sergi Formation	Mesozoic	dune,sandsheet_undifferentiated	\N	3.5	moderate_subsidence	greenhouse	west_gondwanaland
Sergi Formation	Mesozoic	dune,sandsheet_undifferentiated	\N	1	moderate_subsidence	greenhouse	west_gondwanaland
Sergi Formation	Mesozoic	dune,sandsheet_undifferentiated	\N	3	moderate_subsidence	greenhouse	west_gondwanaland
Sergi Formation	Mesozoic	dune,sandsheet_undifferentiated	\N	4	moderate_subsidence	greenhouse	west_gondwanaland
Sergi Formation	Mesozoic	dune,sandsheet_undifferentiated	\N	2	moderate_subsidence	greenhouse	west_gondwanaland
Sergi Formation	Mesozoic	dune,sandsheet_undifferentiated	\N	3	moderate_subsidence	greenhouse	west_gondwanaland
Sergi Formation	Mesozoic	dune,sandsheet_undifferentiated	\N	3	moderate_subsidence	greenhouse	west_gondwanaland
Sergi Formation	Mesozoic	dune,sandsheet_undifferentiated	\N	5	moderate_subsidence	greenhouse	west_gondwanaland
Sergi Formation	Mesozoic	dune,sandsheet_undifferentiated	\N	3.5	moderate_subsidence	greenhouse	west_gondwanaland
Sergi Formation	Mesozoic	dune,sandsheet_undifferentiated	\N	0.25	moderate_subsidence	greenhouse	west_gondwanaland
Sergi Formation	Mesozoic	dune,sandsheet_undifferentiated	\N	2.5	moderate_subsidence	greenhouse	west_gondwanaland
Sergi Formation	Mesozoic	dune,sandsheet_undifferentiated	\N	22.2	moderate_subsidence	greenhouse	west_gondwanaland
Sergi Formation	Mesozoic	dune,sandsheet_undifferentiated	\N	0.25	moderate_subsidence	greenhouse	west_gondwanaland
Sergi Formation	Mesozoic	dune,sandsheet_undifferentiated	\N	0.25	moderate_subsidence	greenhouse	west_gondwanaland
Sergi Formation	Mesozoic	dune,sandsheet_undifferentiated	\N	1.5	moderate_subsidence	greenhouse	west_gondwanaland
Sergi Formation	Mesozoic	dune,sandsheet_undifferentiated	\N	3	moderate_subsidence	greenhouse	west_gondwanaland
Sergi Formation	Mesozoic	dune,sandsheet_undifferentiated	\N	3	moderate_subsidence	greenhouse	west_gondwanaland
Sergi Formation	Mesozoic	dune,sandsheet_undifferentiated	\N	0.75	moderate_subsidence	greenhouse	west_gondwanaland
Sergi Formation	Mesozoic	dune,sandsheet_undifferentiated	\N	2	moderate_subsidence	greenhouse	west_gondwanaland
Wolfville Formation	Mesozoic	dune,sandsheet_undifferentiated,undifferentiated_aeolian_strata	\N	6	moderate_subsidence	greenhouse	pangaea
Wolfville Formation	Mesozoic	dune,sandsheet_undifferentiated,undifferentiated_aeolian_strata	\N	5	moderate_subsidence	greenhouse	pangaea
Wolfville Formation	Mesozoic	dune,sandsheet_undifferentiated,undifferentiated_aeolian_strata	\N	20	moderate_subsidence	greenhouse	pangaea
Wolfville Formation	Mesozoic	dune,sandsheet_undifferentiated,undifferentiated_aeolian_strata	\N	6	moderate_subsidence	greenhouse	pangaea
Wolfville Formation	Mesozoic	dune,sandsheet_undifferentiated,undifferentiated_aeolian_strata	\N	5	moderate_subsidence	greenhouse	pangaea
Wolfville Formation	Mesozoic	dune,sandsheet_undifferentiated,undifferentiated_aeolian_strata	\N	16	moderate_subsidence	greenhouse	pangaea
Wolfville Formation	Mesozoic	dune,sandsheet_undifferentiated,undifferentiated_aeolian_strata	\N	12.5	moderate_subsidence	greenhouse	pangaea
Wolfville Formation	Mesozoic	dune,sandsheet_undifferentiated,undifferentiated_aeolian_strata	\N	20	moderate_subsidence	greenhouse	pangaea
Wolfville Formation	Mesozoic	dune,sandsheet_undifferentiated,undifferentiated_aeolian_strata	\N	12.5	moderate_subsidence	greenhouse	pangaea
Wolfville Formation	Mesozoic	dune,sandsheet_undifferentiated,undifferentiated_aeolian_strata	\N	7	moderate_subsidence	greenhouse	pangaea
Wolfville Formation	Mesozoic	dune,sandsheet_undifferentiated,undifferentiated_aeolian_strata	\N	2.5	moderate_subsidence	greenhouse	pangaea
Wolfville Formation	Mesozoic	dune,sandsheet_undifferentiated,undifferentiated_aeolian_strata	\N	12.5	moderate_subsidence	greenhouse	pangaea
Wolfville Formation	Mesozoic	dune,sandsheet_undifferentiated,undifferentiated_aeolian_strata	\N	7	moderate_subsidence	greenhouse	pangaea
Wolfville Formation	Mesozoic	dune,sandsheet_undifferentiated,undifferentiated_aeolian_strata	\N	3	moderate_subsidence	greenhouse	pangaea
Wolfville Formation	Mesozoic	dune,sandsheet_undifferentiated,undifferentiated_aeolian_strata	\N	9	moderate_subsidence	greenhouse	pangaea
Wolfville Formation	Mesozoic	dune,sandsheet_undifferentiated,undifferentiated_aeolian_strata	\N	15	moderate_subsidence	greenhouse	pangaea
Wolfville Formation	Mesozoic	dune,sandsheet_undifferentiated,undifferentiated_aeolian_strata	\N	8	moderate_subsidence	greenhouse	pangaea
Wolfville Formation	Mesozoic	dune,sandsheet_undifferentiated,undifferentiated_aeolian_strata	\N	5	moderate_subsidence	greenhouse	pangaea
Wolfville Formation	Mesozoic	dune,sandsheet_undifferentiated,undifferentiated_aeolian_strata	\N	14	moderate_subsidence	greenhouse	pangaea
Wolfville Formation	Mesozoic	dune,sandsheet_undifferentiated,undifferentiated_aeolian_strata	\N	6	moderate_subsidence	greenhouse	pangaea
Wolfville Formation	Mesozoic	dune,sandsheet_undifferentiated,undifferentiated_aeolian_strata	\N	12.5	moderate_subsidence	greenhouse	pangaea
Wolfville Formation	Mesozoic	dune,sandsheet_undifferentiated,undifferentiated_aeolian_strata	\N	4	moderate_subsidence	greenhouse	pangaea
Wolfville Formation	Mesozoic	dune,sandsheet_undifferentiated,undifferentiated_aeolian_strata	\N	2.5	moderate_subsidence	greenhouse	pangaea
Wolfville Formation	Mesozoic	dune,sandsheet_undifferentiated,undifferentiated_aeolian_strata	\N	0.5	moderate_subsidence	greenhouse	pangaea
Wolfville Formation	Mesozoic	dune,sandsheet_undifferentiated,undifferentiated_aeolian_strata	\N	7.5	moderate_subsidence	greenhouse	pangaea
Wolfville Formation	Mesozoic	dune,sandsheet_undifferentiated,undifferentiated_aeolian_strata	\N	20	moderate_subsidence	greenhouse	pangaea
Wolfville Formation	Mesozoic	dune,sandsheet_undifferentiated,undifferentiated_aeolian_strata	\N	1.5	moderate_subsidence	greenhouse	pangaea
Wolfville Formation	Mesozoic	dune,sandsheet_undifferentiated,undifferentiated_aeolian_strata	\N	10	moderate_subsidence	greenhouse	pangaea
Wolfville Formation	Mesozoic	dune,sandsheet_undifferentiated,undifferentiated_aeolian_strata	\N	7	moderate_subsidence	greenhouse	pangaea
Wolfville Formation	Mesozoic	dune,sandsheet_undifferentiated,undifferentiated_aeolian_strata	\N	2.5	moderate_subsidence	greenhouse	pangaea
Wolfville Formation	Mesozoic	dune,sandsheet_undifferentiated,undifferentiated_aeolian_strata	\N	10	moderate_subsidence	greenhouse	pangaea
Wolfville Formation	Mesozoic	dune,sandsheet_undifferentiated,undifferentiated_aeolian_strata	\N	1	moderate_subsidence	greenhouse	pangaea
Wolfville Formation	Mesozoic	dune,sandsheet_undifferentiated,undifferentiated_aeolian_strata	\N	1	moderate_subsidence	greenhouse	pangaea
Wolfville Formation	Mesozoic	dune,sandsheet_undifferentiated,undifferentiated_aeolian_strata	\N	8	moderate_subsidence	greenhouse	pangaea
Wolfville Formation	Mesozoic	dune,sandsheet_undifferentiated,undifferentiated_aeolian_strata	\N	2	moderate_subsidence	greenhouse	pangaea
Wolfville Formation	Mesozoic	dune,sandsheet_undifferentiated,undifferentiated_aeolian_strata	\N	2	moderate_subsidence	greenhouse	pangaea
Wolfville Formation	Mesozoic	dune,sandsheet_undifferentiated,undifferentiated_aeolian_strata	\N	7	moderate_subsidence	greenhouse	pangaea
Wolfville Formation	Mesozoic	dune,sandsheet_undifferentiated,undifferentiated_aeolian_strata	\N	7	moderate_subsidence	greenhouse	pangaea
Wolfville Formation	Mesozoic	dune,sandsheet_undifferentiated,undifferentiated_aeolian_strata	\N	4	moderate_subsidence	greenhouse	pangaea
Wolfville Formation	Mesozoic	dune,sandsheet_undifferentiated,undifferentiated_aeolian_strata	\N	7	moderate_subsidence	greenhouse	pangaea
Wolfville Formation	Mesozoic	dune,sandsheet_undifferentiated,undifferentiated_aeolian_strata	\N	3	moderate_subsidence	greenhouse	pangaea
Wolfville Formation	Mesozoic	dune,sandsheet_undifferentiated,undifferentiated_aeolian_strata	\N	6	moderate_subsidence	greenhouse	pangaea
Wolfville Formation	Mesozoic	dune,sandsheet_undifferentiated,undifferentiated_aeolian_strata	\N	7	moderate_subsidence	greenhouse	pangaea
Wolfville Formation	Mesozoic	dune,sandsheet_undifferentiated,undifferentiated_aeolian_strata	\N	4	moderate_subsidence	greenhouse	pangaea
Wolfville Formation	Mesozoic	dune,sandsheet_undifferentiated,undifferentiated_aeolian_strata	\N	8	moderate_subsidence	greenhouse	pangaea
Wolfville Formation	Mesozoic	dune,sandsheet_undifferentiated,undifferentiated_aeolian_strata	\N	2	moderate_subsidence	greenhouse	pangaea
Wolfville Formation	Mesozoic	dune,sandsheet_undifferentiated,undifferentiated_aeolian_strata	\N	4	moderate_subsidence	greenhouse	pangaea
Wolfville Formation	Mesozoic	dune,sandsheet_undifferentiated,undifferentiated_aeolian_strata	\N	4.5	moderate_subsidence	greenhouse	pangaea
Wolfville Formation	Mesozoic	dune,sandsheet_undifferentiated,undifferentiated_aeolian_strata	\N	2	moderate_subsidence	greenhouse	pangaea
Wolfville Formation	Mesozoic	dune,sandsheet_undifferentiated,undifferentiated_aeolian_strata	\N	1	moderate_subsidence	greenhouse	pangaea
Wolfville Formation	Mesozoic	dune,sandsheet_undifferentiated,undifferentiated_aeolian_strata	\N	4	moderate_subsidence	greenhouse	pangaea
Wolfville Formation	Mesozoic	dune,sandsheet_undifferentiated,undifferentiated_aeolian_strata	\N	1	moderate_subsidence	greenhouse	pangaea
Wolfville Formation	Mesozoic	dune,sandsheet_undifferentiated,undifferentiated_aeolian_strata	\N	3	moderate_subsidence	greenhouse	pangaea
Wolfville Formation	Mesozoic	dune,sandsheet_undifferentiated,undifferentiated_aeolian_strata	\N	2	moderate_subsidence	greenhouse	pangaea
Wolfville Formation	Mesozoic	dune,sandsheet_undifferentiated,undifferentiated_aeolian_strata	\N	5	moderate_subsidence	greenhouse	pangaea
Wolfville Formation	Mesozoic	dune,sandsheet_undifferentiated,undifferentiated_aeolian_strata	\N	2	moderate_subsidence	greenhouse	pangaea
Wolfville Formation	Mesozoic	dune,sandsheet_undifferentiated,undifferentiated_aeolian_strata	\N	2	moderate_subsidence	greenhouse	pangaea
Wolfville Formation	Mesozoic	dune,sandsheet_undifferentiated,undifferentiated_aeolian_strata	\N	0.5	moderate_subsidence	greenhouse	pangaea
Wolfville Formation	Mesozoic	dune,sandsheet_undifferentiated,undifferentiated_aeolian_strata	\N	2	moderate_subsidence	greenhouse	pangaea
Wolfville Formation	Mesozoic	dune,sandsheet_undifferentiated,undifferentiated_aeolian_strata	\N	4	moderate_subsidence	greenhouse	pangaea
Wolfville Formation	Mesozoic	dune,sandsheet_undifferentiated,undifferentiated_aeolian_strata	\N	2	moderate_subsidence	greenhouse	pangaea
Wolfville Formation	Mesozoic	dune,sandsheet_undifferentiated,undifferentiated_aeolian_strata	\N	2	moderate_subsidence	greenhouse	pangaea
Wolfville Formation	Mesozoic	dune,sandsheet_undifferentiated,undifferentiated_aeolian_strata	\N	3	moderate_subsidence	greenhouse	pangaea
Wolfville Formation	Mesozoic	dune,sandsheet_undifferentiated,undifferentiated_aeolian_strata	\N	3	moderate_subsidence	greenhouse	pangaea
Wolfville Formation	Mesozoic	dune,sandsheet_undifferentiated,undifferentiated_aeolian_strata	\N	1	moderate_subsidence	greenhouse	pangaea
Wolfville Formation	Mesozoic	dune,sandsheet_undifferentiated,undifferentiated_aeolian_strata	\N	1	moderate_subsidence	greenhouse	pangaea
Entrada Sandstone	Mesozoic	dune,set,sandsheet_undifferentiated	\N	2	moderate_subsidence	greenhouse	pangaea
Entrada Sandstone	Mesozoic	dune,set,sandsheet_undifferentiated	\N	1.75	moderate_subsidence	greenhouse	pangaea
Entrada Sandstone	Mesozoic	dune,set,sandsheet_undifferentiated	\N	1.75	moderate_subsidence	greenhouse	pangaea
Wolfville Formation	Mesozoic	interdune_undifferentiated	\N	0.5	moderate_subsidence	greenhouse	pangaea
Wolfville Formation	Mesozoic	interdune_undifferentiated	\N	0.5	moderate_subsidence	greenhouse	pangaea
Wolfville Formation	Mesozoic	interdune_undifferentiated	\N	1	moderate_subsidence	greenhouse	pangaea
Wolfville Formation	Mesozoic	interdune_undifferentiated	\N	2	moderate_subsidence	greenhouse	pangaea
Wolfville Formation	Mesozoic	interdune_undifferentiated	\N	2	moderate_subsidence	greenhouse	pangaea
Entrada Sandstone	Mesozoic	interdune_undifferentiated	\N	10	moderate_subsidence	greenhouse	pangaea
Navajo Sandstone	Mesozoic	interdune_wet	\N	4	moderate_subsidence	greenhouse	pangaea
Navajo Sandstone	Mesozoic	interdune_wet	\N	12	moderate_subsidence	greenhouse	pangaea
Huitrin Formation	Mesozoic	sandsheet_undifferentiated	\N	2	moderate_subsidence	greenhouse	none
Huitrin Formation	Mesozoic	sandsheet_undifferentiated	\N	1	moderate_subsidence	greenhouse	none
Huitrin Formation	Mesozoic	sandsheet_undifferentiated	\N	1	moderate_subsidence	greenhouse	none
Huitrin Formation	Mesozoic	sandsheet_undifferentiated	\N	2	moderate_subsidence	greenhouse	none
Huitrin Formation	Mesozoic	sandsheet_undifferentiated	\N	2	moderate_subsidence	greenhouse	none
Huitrin Formation	Mesozoic	sandsheet_undifferentiated	\N	1.25	moderate_subsidence	greenhouse	none
Huitrin Formation	Mesozoic	sandsheet_undifferentiated	\N	2	moderate_subsidence	greenhouse	none
Huitrin Formation	Mesozoic	sandsheet_undifferentiated	\N	1	moderate_subsidence	greenhouse	none
Agrio Formation	Mesozoic	sandsheet_undifferentiated	\N	1.25	moderate_subsidence	greenhouse	none
Agrio Formation	Mesozoic	sandsheet_undifferentiated	\N	1.25	moderate_subsidence	greenhouse	none
Agrio Formation	Mesozoic	sandsheet_undifferentiated	\N	1	moderate_subsidence	greenhouse	none
Sao Sebastio Formation	Mesozoic	sandsheet_undifferentiated	\N	1	moderate_subsidence	greenhouse	west_gondwanaland
Sao Sebastio Formation	Mesozoic	sandsheet_undifferentiated	\N	2	moderate_subsidence	greenhouse	west_gondwanaland
Sergi Formation	Mesozoic	sandsheet_undifferentiated	\N	3.5	moderate_subsidence	greenhouse	west_gondwanaland
Sergi Formation	Mesozoic	sandsheet_undifferentiated	\N	1.1	moderate_subsidence	greenhouse	west_gondwanaland
Sergi Formation	Mesozoic	sandsheet_undifferentiated	\N	3.4	moderate_subsidence	greenhouse	west_gondwanaland
Sergi Formation	Mesozoic	sandsheet_undifferentiated	\N	4	moderate_subsidence	greenhouse	west_gondwanaland
Sergi Formation	Mesozoic	sandsheet_undifferentiated	\N	2.5	moderate_subsidence	greenhouse	west_gondwanaland
Sergi Formation	Mesozoic	sandsheet_undifferentiated	\N	8	moderate_subsidence	greenhouse	west_gondwanaland
Sergi Formation	Mesozoic	sandsheet_undifferentiated	\N	3.5	moderate_subsidence	greenhouse	west_gondwanaland
Sergi Formation	Mesozoic	sandsheet_undifferentiated	\N	3.5	moderate_subsidence	greenhouse	west_gondwanaland
Sergi Formation	Mesozoic	sandsheet_undifferentiated	\N	2.25	moderate_subsidence	greenhouse	west_gondwanaland
Sergi Formation	Mesozoic	sandsheet_undifferentiated	\N	4.25	moderate_subsidence	greenhouse	west_gondwanaland
Sergi Formation	Mesozoic	sandsheet_undifferentiated	\N	2	moderate_subsidence	greenhouse	west_gondwanaland
Sergi Formation	Mesozoic	sandsheet_undifferentiated	\N	5	moderate_subsidence	greenhouse	west_gondwanaland
Sergi Formation	Mesozoic	sandsheet_undifferentiated	\N	2	moderate_subsidence	greenhouse	west_gondwanaland
Sergi Formation	Mesozoic	sandsheet_undifferentiated	\N	4	moderate_subsidence	greenhouse	west_gondwanaland
Sergi Formation	Mesozoic	sandsheet_undifferentiated	\N	7.5	moderate_subsidence	greenhouse	west_gondwanaland
Sergi Formation	Mesozoic	sandsheet_undifferentiated	\N	3	moderate_subsidence	greenhouse	west_gondwanaland
Sergi Formation	Mesozoic	sandsheet_undifferentiated	\N	2	moderate_subsidence	greenhouse	west_gondwanaland
Chugwater Group	Mesozoic	sandsheet_undifferentiated	\N	1.5	moderate_subsidence	greenhouse	pangaea
Chugwater Group	Mesozoic	sandsheet_undifferentiated	\N	1	moderate_subsidence	greenhouse	pangaea
Chugwater Group	Mesozoic	sandsheet_undifferentiated	\N	1	moderate_subsidence	greenhouse	pangaea
Sherwood Sandstone	Mesozoic	sandsheet_undifferentiated	\N	1.5	moderate_subsidence	icehouse	pangaea
Sherwood Sandstone	Mesozoic	sandsheet_undifferentiated	\N	0.5	moderate_subsidence	icehouse	pangaea
Sherwood Sandstone	Mesozoic	sandsheet_undifferentiated	\N	1	moderate_subsidence	icehouse	pangaea
Sherwood Sandstone	Mesozoic	sandsheet_undifferentiated	\N	3	moderate_subsidence	icehouse	pangaea
Sherwood Sandstone	Mesozoic	sandsheet_undifferentiated	\N	0.5	moderate_subsidence	icehouse	pangaea
Sherwood Sandstone	Mesozoic	sandsheet_undifferentiated	\N	0.5	moderate_subsidence	icehouse	pangaea
Sherwood Sandstone	Mesozoic	sandsheet_undifferentiated	\N	1	moderate_subsidence	icehouse	pangaea
Sherwood Sandstone	Mesozoic	sandsheet_undifferentiated	\N	2	moderate_subsidence	icehouse	pangaea
Sherwood Sandstone	Mesozoic	sandsheet_undifferentiated	\N	3	moderate_subsidence	icehouse	pangaea
Sherwood Sandstone	Mesozoic	sandsheet_undifferentiated	\N	0.5	moderate_subsidence	icehouse	pangaea
Sherwood Sandstone	Mesozoic	sandsheet_undifferentiated	\N	0.5	moderate_subsidence	icehouse	pangaea
Sherwood Sandstone	Mesozoic	sandsheet_undifferentiated	\N	1.5	moderate_subsidence	icehouse	pangaea
Sherwood Sandstone	Mesozoic	sandsheet_undifferentiated	\N	0.5	moderate_subsidence	icehouse	pangaea
Sherwood Sandstone	Mesozoic	sandsheet_undifferentiated	\N	2	moderate_subsidence	icehouse	pangaea
Sherwood Sandstone	Mesozoic	sandsheet_undifferentiated	\N	3	moderate_subsidence	icehouse	pangaea
Sherwood Sandstone	Mesozoic	sandsheet_undifferentiated	\N	1	moderate_subsidence	icehouse	pangaea
Sherwood Sandstone	Mesozoic	sandsheet_undifferentiated	\N	1.5	moderate_subsidence	icehouse	pangaea
Sherwood Sandstone	Mesozoic	sandsheet_undifferentiated	\N	1.5	moderate_subsidence	icehouse	pangaea
Sherwood Sandstone	Mesozoic	sandsheet_undifferentiated	\N	0.5	moderate_subsidence	icehouse	pangaea
Sherwood Sandstone	Mesozoic	sandsheet_undifferentiated	\N	0.5	moderate_subsidence	icehouse	pangaea
Sherwood Sandstone	Mesozoic	sandsheet_undifferentiated	\N	1	moderate_subsidence	icehouse	pangaea
Sherwood Sandstone	Mesozoic	sandsheet_undifferentiated	\N	0.5	moderate_subsidence	icehouse	pangaea
Sherwood Sandstone	Mesozoic	sandsheet_undifferentiated	\N	0.5	moderate_subsidence	icehouse	pangaea
Sherwood Sandstone	Mesozoic	sandsheet_undifferentiated	\N	0.5	moderate_subsidence	icehouse	pangaea
Sergi Formation	Mesozoic	sandsheet_undifferentiated	\N	2	moderate_subsidence	greenhouse	west_gondwanaland
Sergi Formation	Mesozoic	sandsheet_undifferentiated	\N	2	moderate_subsidence	greenhouse	west_gondwanaland
Sergi Formation	Mesozoic	sandsheet_undifferentiated	\N	3	moderate_subsidence	greenhouse	west_gondwanaland
Sergi Formation	Mesozoic	sandsheet_undifferentiated	\N	4.5	moderate_subsidence	greenhouse	west_gondwanaland
Sergi Formation	Mesozoic	sandsheet_undifferentiated	\N	3	moderate_subsidence	greenhouse	west_gondwanaland
Sergi Formation	Mesozoic	sandsheet_undifferentiated	\N	5	moderate_subsidence	greenhouse	west_gondwanaland
Sergi Formation	Mesozoic	sandsheet_undifferentiated	\N	16.5	moderate_subsidence	greenhouse	west_gondwanaland
Sergi Formation	Mesozoic	sandsheet_undifferentiated	\N	6	moderate_subsidence	greenhouse	west_gondwanaland
Sergi Formation	Mesozoic	sandsheet_undifferentiated	\N	2.5	moderate_subsidence	greenhouse	west_gondwanaland
Chugwater Group	Mesozoic	sandsheet_undifferentiated,interdune_damp	\N	1.5	moderate_subsidence	greenhouse	pangaea
Chugwater Group	Mesozoic	sandsheet_undifferentiated,interdune_damp	\N	1.5	moderate_subsidence	greenhouse	pangaea
Chugwater Group	Mesozoic	sandsheet_undifferentiated,interdune_damp	\N	1.5	moderate_subsidence	greenhouse	pangaea
Chugwater Group	Mesozoic	sandsheet_undifferentiated,interdune_damp	\N	1.5	moderate_subsidence	greenhouse	pangaea
Chugwater Group	Mesozoic	sandsheet_undifferentiated,interdune_damp	\N	1.5	moderate_subsidence	greenhouse	pangaea
Page Sandstone	Mesozoic	sandsheet_undifferentiated,sandsheet_zibar	\N	3	moderate_subsidence	greenhouse	none
Page Sandstone	Mesozoic	sandsheet_undifferentiated,sandsheet_zibar	\N	0.75	moderate_subsidence	greenhouse	none
Page Sandstone	Mesozoic	sandsheet_undifferentiated,sandsheet_zibar	\N	2	moderate_subsidence	greenhouse	none
Page Sandstone	Mesozoic	sandsheet_undifferentiated,sandsheet_zibar	\N	0.5	moderate_subsidence	greenhouse	none
Page Sandstone	Mesozoic	sandsheet_undifferentiated,sandsheet_zibar	\N	2	moderate_subsidence	greenhouse	none
Page Sandstone	Mesozoic	sandsheet_undifferentiated,sandsheet_zibar	\N	3	moderate_subsidence	greenhouse	none
Page Sandstone	Mesozoic	sandsheet_undifferentiated,sandsheet_zibar	\N	2.5	moderate_subsidence	greenhouse	none
Page Sandstone	Mesozoic	sandsheet_undifferentiated,sandsheet_zibar	\N	1.5	moderate_subsidence	greenhouse	none
Page Sandstone	Mesozoic	sandsheet_undifferentiated,sandsheet_zibar	\N	1.5	moderate_subsidence	greenhouse	none
Page Sandstone	Mesozoic	sandsheet_undifferentiated,sandsheet_zibar	\N	2.5	moderate_subsidence	greenhouse	none
Page Sandstone	Mesozoic	sandsheet_undifferentiated,sandsheet_zibar	\N	10	moderate_subsidence	greenhouse	none
Page Sandstone	Mesozoic	sandsheet_undifferentiated,sandsheet_zibar	\N	2	moderate_subsidence	greenhouse	none
Page Sandstone	Mesozoic	sandsheet_undifferentiated,sandsheet_zibar	\N	8	moderate_subsidence	greenhouse	none
Page Sandstone	Mesozoic	sandsheet_undifferentiated,sandsheet_zibar	\N	0.5	moderate_subsidence	greenhouse	none
Page Sandstone	Mesozoic	sandsheet_undifferentiated,sandsheet_zibar	\N	0.75	moderate_subsidence	greenhouse	none
Page Sandstone	Mesozoic	sandsheet_undifferentiated,sandsheet_zibar	\N	1	moderate_subsidence	greenhouse	none
Page Sandstone	Mesozoic	sandsheet_undifferentiated,sandsheet_zibar	\N	11	moderate_subsidence	greenhouse	none
Page Sandstone	Mesozoic	sandsheet_undifferentiated,sandsheet_zibar	\N	2	moderate_subsidence	greenhouse	none
Page Sandstone	Mesozoic	sandsheet_undifferentiated,sandsheet_zibar	\N	3	moderate_subsidence	greenhouse	none
Sao Sebastio Formation	Mesozoic	sandsheet_zibar	\N	0.5	moderate_subsidence	greenhouse	west_gondwanaland
Sao Sebastio Formation	Mesozoic	sandsheet_zibar	\N	1.5	moderate_subsidence	greenhouse	west_gondwanaland
Sao Sebastio Formation	Mesozoic	sandsheet_zibar	\N	1	moderate_subsidence	greenhouse	west_gondwanaland
Sao Sebastio Formation	Mesozoic	sandsheet_zibar	\N	2	moderate_subsidence	greenhouse	west_gondwanaland
Sao Sebastio Formation	Mesozoic	sandsheet_zibar	\N	0.75	moderate_subsidence	greenhouse	west_gondwanaland
Sao Sebastio Formation	Mesozoic	sandsheet_zibar	\N	2.5	moderate_subsidence	greenhouse	west_gondwanaland
Sao Sebastio Formation	Mesozoic	sandsheet_zibar	\N	3	moderate_subsidence	greenhouse	west_gondwanaland
Sao Sebastio Formation	Mesozoic	sandsheet_zibar	\N	4	moderate_subsidence	greenhouse	west_gondwanaland
Sao Sebastio Formation	Mesozoic	sandsheet_zibar	\N	3	moderate_subsidence	greenhouse	west_gondwanaland
Sao Sebastio Formation	Mesozoic	sandsheet_zibar	\N	1.75	moderate_subsidence	greenhouse	west_gondwanaland
Sao Sebastio Formation	Mesozoic	sandsheet_zibar	\N	1	moderate_subsidence	greenhouse	west_gondwanaland
Sao Sebastio Formation	Mesozoic	sandsheet_zibar	\N	1.5	moderate_subsidence	greenhouse	west_gondwanaland
Sao Sebastio Formation	Mesozoic	sandsheet_zibar	\N	2	moderate_subsidence	greenhouse	west_gondwanaland
Huitrin Formation	Mesozoic	set	\N	2	moderate_subsidence	greenhouse	none
Huitrin Formation	Mesozoic	set	\N	7	moderate_subsidence	greenhouse	none
Huitrin Formation	Mesozoic	set	\N	3	moderate_subsidence	greenhouse	none
Huitrin Formation	Mesozoic	set	\N	3	moderate_subsidence	greenhouse	none
Huitrin Formation	Mesozoic	set	\N	1	moderate_subsidence	greenhouse	none
Huitrin Formation	Mesozoic	set	\N	15	moderate_subsidence	greenhouse	none
Huitrin Formation	Mesozoic	set	\N	2	moderate_subsidence	greenhouse	none
Huitrin Formation	Mesozoic	set	\N	5.5	moderate_subsidence	greenhouse	none
Huitrin Formation	Mesozoic	set	\N	4.5	moderate_subsidence	greenhouse	none
Huitrin Formation	Mesozoic	set	\N	3	moderate_subsidence	greenhouse	none
Huitrin Formation	Mesozoic	set	\N	2	moderate_subsidence	greenhouse	none
Huitrin Formation	Mesozoic	set	\N	2	moderate_subsidence	greenhouse	none
Huitrin Formation	Mesozoic	set	\N	2	moderate_subsidence	greenhouse	none
Huitrin Formation	Mesozoic	set	\N	1	moderate_subsidence	greenhouse	none
Huitrin Formation	Mesozoic	set	\N	1	moderate_subsidence	greenhouse	none
Huitrin Formation	Mesozoic	set	\N	1	moderate_subsidence	greenhouse	none
Huitrin Formation	Mesozoic	set	\N	1.5	moderate_subsidence	greenhouse	none
Agrio Formation	Mesozoic	set	\N	3.75	moderate_subsidence	greenhouse	none
Agrio Formation	Mesozoic	set	\N	5.5	moderate_subsidence	greenhouse	none
Agrio Formation	Mesozoic	set	\N	3.5	moderate_subsidence	greenhouse	none
Agrio Formation	Mesozoic	set	\N	3.75	moderate_subsidence	greenhouse	none
Agrio Formation	Mesozoic	set	\N	1.4	moderate_subsidence	greenhouse	none
Agrio Formation	Mesozoic	set	\N	1.4	moderate_subsidence	greenhouse	none
Agrio Formation	Mesozoic	set	\N	1.5	moderate_subsidence	greenhouse	none
Agrio Formation	Mesozoic	set	\N	1.5	moderate_subsidence	greenhouse	none
Agrio Formation	Mesozoic	set	\N	1	moderate_subsidence	greenhouse	none
Agrio Formation	Mesozoic	set	\N	1.25	moderate_subsidence	greenhouse	none
Agrio Formation	Mesozoic	set	\N	1.75	moderate_subsidence	greenhouse	none
Agrio Formation	Mesozoic	set	\N	1	moderate_subsidence	greenhouse	none
Agrio Formation	Mesozoic	set	\N	1	moderate_subsidence	greenhouse	none
Agrio Formation	Mesozoic	set	\N	1	moderate_subsidence	greenhouse	none
Agrio Formation	Mesozoic	set	\N	1.5	moderate_subsidence	greenhouse	none
Agrio Formation	Mesozoic	set	\N	1	moderate_subsidence	greenhouse	none
Agrio Formation	Mesozoic	set	\N	2	moderate_subsidence	greenhouse	none
Agrio Formation	Mesozoic	set	\N	4	moderate_subsidence	greenhouse	none
Agrio Formation	Mesozoic	set	\N	6	moderate_subsidence	greenhouse	none
Agrio Formation	Mesozoic	set	\N	5	moderate_subsidence	greenhouse	none
Agrio Formation	Mesozoic	set	\N	6	moderate_subsidence	greenhouse	none
Agrio Formation	Mesozoic	set	\N	3	moderate_subsidence	greenhouse	none
Agrio Formation	Mesozoic	set	\N	6	moderate_subsidence	greenhouse	none
Agrio Formation	Mesozoic	set	\N	3	moderate_subsidence	greenhouse	none
Agrio Formation	Mesozoic	set	\N	6	moderate_subsidence	greenhouse	none
Sao Sebastio Formation	Mesozoic	set	\N	1.5	moderate_subsidence	greenhouse	west_gondwanaland
Sao Sebastio Formation	Mesozoic	set	\N	1	moderate_subsidence	greenhouse	west_gondwanaland
Sao Sebastio Formation	Mesozoic	set	\N	0.5	moderate_subsidence	greenhouse	west_gondwanaland
Sao Sebastio Formation	Mesozoic	set	\N	0.5	moderate_subsidence	greenhouse	west_gondwanaland
Sao Sebastio Formation	Mesozoic	set	\N	1	moderate_subsidence	greenhouse	west_gondwanaland
Sao Sebastio Formation	Mesozoic	set	\N	0.5	moderate_subsidence	greenhouse	west_gondwanaland
Sao Sebastio Formation	Mesozoic	set	\N	0.5	moderate_subsidence	greenhouse	west_gondwanaland
Sao Sebastio Formation	Mesozoic	set	\N	1.25	moderate_subsidence	greenhouse	west_gondwanaland
Sao Sebastio Formation	Mesozoic	set	\N	1	moderate_subsidence	greenhouse	west_gondwanaland
Sao Sebastio Formation	Mesozoic	set	\N	2.25	moderate_subsidence	greenhouse	west_gondwanaland
Sao Sebastio Formation	Mesozoic	set	\N	1	moderate_subsidence	greenhouse	west_gondwanaland
Sao Sebastio Formation	Mesozoic	set	\N	1	moderate_subsidence	greenhouse	west_gondwanaland
Sao Sebastio Formation	Mesozoic	set	\N	0.35	moderate_subsidence	greenhouse	west_gondwanaland
Sao Sebastio Formation	Mesozoic	set	\N	0.4	moderate_subsidence	greenhouse	west_gondwanaland
Sao Sebastio Formation	Mesozoic	set	\N	2.25	moderate_subsidence	greenhouse	west_gondwanaland
Sao Sebastio Formation	Mesozoic	set	\N	1.75	moderate_subsidence	greenhouse	west_gondwanaland
Sao Sebastio Formation	Mesozoic	set	\N	2	moderate_subsidence	greenhouse	west_gondwanaland
Sao Sebastio Formation	Mesozoic	set	\N	2	moderate_subsidence	greenhouse	west_gondwanaland
Sao Sebastio Formation	Mesozoic	set	\N	4.5	moderate_subsidence	greenhouse	west_gondwanaland
Sao Sebastio Formation	Mesozoic	set	\N	5.5	moderate_subsidence	greenhouse	west_gondwanaland
Sao Sebastio Formation	Mesozoic	set	\N	10	moderate_subsidence	greenhouse	west_gondwanaland
Sao Sebastio Formation	Mesozoic	set	\N	1.5	moderate_subsidence	greenhouse	west_gondwanaland
Sao Sebastio Formation	Mesozoic	set	\N	1.5	moderate_subsidence	greenhouse	west_gondwanaland
Sao Sebastio Formation	Mesozoic	set	\N	0.5	moderate_subsidence	greenhouse	west_gondwanaland
Sao Sebastio Formation	Mesozoic	set	\N	0.1	moderate_subsidence	greenhouse	west_gondwanaland
Sao Sebastio Formation	Mesozoic	set	\N	0.1	moderate_subsidence	greenhouse	west_gondwanaland
Sao Sebastio Formation	Mesozoic	set	\N	0.1	moderate_subsidence	greenhouse	west_gondwanaland
Sao Sebastio Formation	Mesozoic	set	\N	15	moderate_subsidence	greenhouse	west_gondwanaland
Sao Sebastio Formation	Mesozoic	set	\N	12.5	moderate_subsidence	greenhouse	west_gondwanaland
Sao Sebastio Formation	Mesozoic	set	\N	5	moderate_subsidence	greenhouse	west_gondwanaland
Sao Sebastio Formation	Mesozoic	set	\N	6	moderate_subsidence	greenhouse	west_gondwanaland
Sao Sebastio Formation	Mesozoic	set	\N	1.25	moderate_subsidence	greenhouse	west_gondwanaland
Sao Sebastio Formation	Mesozoic	set	\N	1.25	moderate_subsidence	greenhouse	west_gondwanaland
Sao Sebastio Formation	Mesozoic	set	\N	2.5	moderate_subsidence	greenhouse	west_gondwanaland
Sao Sebastio Formation	Mesozoic	set	\N	1.25	moderate_subsidence	greenhouse	west_gondwanaland
Sao Sebastio Formation	Mesozoic	set	\N	9	moderate_subsidence	greenhouse	west_gondwanaland
Sao Sebastio Formation	Mesozoic	set	\N	7.5	moderate_subsidence	greenhouse	west_gondwanaland
Sao Sebastio Formation	Mesozoic	set	\N	3.5	moderate_subsidence	greenhouse	west_gondwanaland
Sao Sebastio Formation	Mesozoic	set	\N	3	moderate_subsidence	greenhouse	west_gondwanaland
Sao Sebastio Formation	Mesozoic	set	\N	0.25	moderate_subsidence	greenhouse	west_gondwanaland
Sao Sebastio Formation	Mesozoic	set	\N	1	moderate_subsidence	greenhouse	west_gondwanaland
Sao Sebastio Formation	Mesozoic	set	\N	0.4	moderate_subsidence	greenhouse	west_gondwanaland
Sao Sebastio Formation	Mesozoic	set	\N	1.25	moderate_subsidence	greenhouse	west_gondwanaland
Sao Sebastio Formation	Mesozoic	set	\N	0.8	moderate_subsidence	greenhouse	west_gondwanaland
Sao Sebastio Formation	Mesozoic	set	\N	0.3	moderate_subsidence	greenhouse	west_gondwanaland
Sao Sebastio Formation	Mesozoic	set	\N	0.15	moderate_subsidence	greenhouse	west_gondwanaland
Sergi Formation	Mesozoic	set	\N	0.7	moderate_subsidence	greenhouse	west_gondwanaland
Sergi Formation	Mesozoic	set	\N	0.7	moderate_subsidence	greenhouse	west_gondwanaland
Sergi Formation	Mesozoic	set	\N	0.7	moderate_subsidence	greenhouse	west_gondwanaland
Sergi Formation	Mesozoic	set	\N	2.4	moderate_subsidence	greenhouse	west_gondwanaland
Sergi Formation	Mesozoic	set	\N	0.55	moderate_subsidence	greenhouse	west_gondwanaland
Sergi Formation	Mesozoic	set	\N	2.45	moderate_subsidence	greenhouse	west_gondwanaland
Sergi Formation	Mesozoic	set	\N	3	moderate_subsidence	greenhouse	west_gondwanaland
Sergi Formation	Mesozoic	set	\N	0.5	moderate_subsidence	greenhouse	west_gondwanaland
Sergi Formation	Mesozoic	set	\N	1	moderate_subsidence	greenhouse	west_gondwanaland
Sergi Formation	Mesozoic	set	\N	1.5	moderate_subsidence	greenhouse	west_gondwanaland
Sergi Formation	Mesozoic	set	\N	3	moderate_subsidence	greenhouse	west_gondwanaland
Sergi Formation	Mesozoic	set	\N	2	moderate_subsidence	greenhouse	west_gondwanaland
Sergi Formation	Mesozoic	set	\N	2.25	moderate_subsidence	greenhouse	west_gondwanaland
Sergi Formation	Mesozoic	set	\N	0.25	moderate_subsidence	greenhouse	west_gondwanaland
Sergi Formation	Mesozoic	set	\N	2.25	moderate_subsidence	greenhouse	west_gondwanaland
Sergi Formation	Mesozoic	set	\N	1.75	moderate_subsidence	greenhouse	west_gondwanaland
Sergi Formation	Mesozoic	set	\N	3.75	moderate_subsidence	greenhouse	west_gondwanaland
Sergi Formation	Mesozoic	set	\N	1.5	moderate_subsidence	greenhouse	west_gondwanaland
Sergi Formation	Mesozoic	set	\N	1.5	moderate_subsidence	greenhouse	west_gondwanaland
Sergi Formation	Mesozoic	set	\N	1.5	moderate_subsidence	greenhouse	west_gondwanaland
Sergi Formation	Mesozoic	set	\N	2.5	moderate_subsidence	greenhouse	west_gondwanaland
Sergi Formation	Mesozoic	set	\N	3	moderate_subsidence	greenhouse	west_gondwanaland
Sergi Formation	Mesozoic	set	\N	0.75	moderate_subsidence	greenhouse	west_gondwanaland
Entrada Sandstone	Mesozoic	set	\N	3.5	moderate_subsidence	greenhouse	pangaea
Entrada Sandstone	Mesozoic	set	\N	4	moderate_subsidence	greenhouse	pangaea
Entrada Sandstone	Mesozoic	set	\N	5	moderate_subsidence	greenhouse	pangaea
Entrada Sandstone	Mesozoic	set	\N	7	moderate_subsidence	greenhouse	pangaea
Entrada Sandstone	Mesozoic	set	\N	7	moderate_subsidence	greenhouse	pangaea
Entrada Sandstone	Mesozoic	set	\N	2	moderate_subsidence	greenhouse	pangaea
Entrada Sandstone	Mesozoic	set	\N	1.75	moderate_subsidence	greenhouse	pangaea
Entrada Sandstone	Mesozoic	set	\N	1.75	moderate_subsidence	greenhouse	pangaea
Entrada Sandstone	Mesozoic	set	\N	1	moderate_subsidence	greenhouse	pangaea
Entrada Sandstone	Mesozoic	set	\N	25	moderate_subsidence	greenhouse	pangaea
Entrada Sandstone	Mesozoic	set	\N	3	moderate_subsidence	greenhouse	pangaea
Entrada Sandstone	Mesozoic	set	\N	8	moderate_subsidence	greenhouse	pangaea
Entrada Sandstone	Mesozoic	set	\N	3	moderate_subsidence	greenhouse	pangaea
Entrada Sandstone	Mesozoic	set	\N	2	moderate_subsidence	greenhouse	pangaea
Entrada Sandstone	Mesozoic	set	\N	2	moderate_subsidence	greenhouse	pangaea
Entrada Sandstone	Mesozoic	set	\N	1	moderate_subsidence	greenhouse	pangaea
Entrada Sandstone	Mesozoic	set	\N	2	moderate_subsidence	greenhouse	pangaea
Entrada Sandstone	Mesozoic	set	\N	7.5	moderate_subsidence	greenhouse	pangaea
Entrada Sandstone	Mesozoic	set	\N	7.5	moderate_subsidence	greenhouse	pangaea
Entrada Sandstone	Mesozoic	set	\N	12	moderate_subsidence	greenhouse	pangaea
Entrada Sandstone	Mesozoic	set	\N	12	moderate_subsidence	greenhouse	pangaea
Entrada Sandstone	Mesozoic	set	\N	7.5	moderate_subsidence	greenhouse	pangaea
Entrada Sandstone	Mesozoic	set	\N	3.75	moderate_subsidence	greenhouse	pangaea
Entrada Sandstone	Mesozoic	set	\N	3.75	moderate_subsidence	greenhouse	pangaea
Entrada Sandstone	Mesozoic	set	\N	3.75	moderate_subsidence	greenhouse	pangaea
Entrada Sandstone	Mesozoic	set	\N	8.75	moderate_subsidence	greenhouse	pangaea
Entrada Sandstone	Mesozoic	set	\N	14	moderate_subsidence	greenhouse	pangaea
Entrada Sandstone	Mesozoic	set	\N	14.75	moderate_subsidence	greenhouse	pangaea
Entrada Sandstone	Mesozoic	set	\N	16	moderate_subsidence	greenhouse	pangaea
Entrada Sandstone	Mesozoic	set	\N	14	moderate_subsidence	greenhouse	pangaea
Entrada Sandstone	Mesozoic	set	\N	2.5	moderate_subsidence	greenhouse	pangaea
Entrada Sandstone	Mesozoic	set	\N	4	moderate_subsidence	greenhouse	pangaea
Entrada Sandstone	Mesozoic	set	\N	3.5	moderate_subsidence	greenhouse	pangaea
Entrada Sandstone	Mesozoic	set	\N	3	moderate_subsidence	greenhouse	pangaea
Entrada Sandstone	Mesozoic	set	\N	6	moderate_subsidence	greenhouse	pangaea
Entrada Sandstone	Mesozoic	set	\N	5	moderate_subsidence	greenhouse	pangaea
Entrada Sandstone	Mesozoic	set	\N	7	moderate_subsidence	greenhouse	pangaea
Entrada Sandstone	Mesozoic	set	\N	22	moderate_subsidence	greenhouse	pangaea
Entrada Sandstone	Mesozoic	set	\N	26	moderate_subsidence	greenhouse	pangaea
Entrada Sandstone	Mesozoic	set	\N	29	moderate_subsidence	greenhouse	pangaea
Entrada Sandstone	Mesozoic	set	\N	30	moderate_subsidence	greenhouse	pangaea
Entrada Sandstone	Mesozoic	set	\N	11	moderate_subsidence	greenhouse	pangaea
Entrada Sandstone	Mesozoic	set	\N	6	moderate_subsidence	greenhouse	pangaea
Entrada Sandstone	Mesozoic	set	\N	8	moderate_subsidence	greenhouse	pangaea
Entrada Sandstone	Mesozoic	set	\N	10	moderate_subsidence	greenhouse	pangaea
Entrada Sandstone	Mesozoic	set	\N	12	moderate_subsidence	greenhouse	pangaea
Entrada Sandstone	Mesozoic	set	\N	20	moderate_subsidence	greenhouse	pangaea
Entrada Sandstone	Mesozoic	set	\N	5	moderate_subsidence	greenhouse	pangaea
Entrada Sandstone	Mesozoic	set	\N	12	moderate_subsidence	greenhouse	pangaea
Entrada Sandstone	Mesozoic	set	\N	15	moderate_subsidence	greenhouse	pangaea
Entrada Sandstone	Mesozoic	set	\N	4.5	moderate_subsidence	greenhouse	pangaea
Entrada Sandstone	Mesozoic	set	\N	15	moderate_subsidence	greenhouse	pangaea
Page Sandstone	Mesozoic	set	\N	1.5	moderate_subsidence	greenhouse	none
Page Sandstone	Mesozoic	set	\N	7.5	moderate_subsidence	greenhouse	none
Page Sandstone	Mesozoic	set	\N	7	moderate_subsidence	greenhouse	none
Page Sandstone	Mesozoic	set	\N	9	moderate_subsidence	greenhouse	none
Page Sandstone	Mesozoic	set	\N	1	moderate_subsidence	greenhouse	none
Page Sandstone	Mesozoic	set	\N	0.75	moderate_subsidence	greenhouse	none
Page Sandstone	Mesozoic	set	\N	4	moderate_subsidence	greenhouse	none
Page Sandstone	Mesozoic	set	\N	12	moderate_subsidence	greenhouse	none
Page Sandstone	Mesozoic	set	\N	2	moderate_subsidence	greenhouse	none
Page Sandstone	Mesozoic	set	\N	1	moderate_subsidence	greenhouse	none
Page Sandstone	Mesozoic	set	\N	5	moderate_subsidence	greenhouse	none
Page Sandstone	Mesozoic	set	\N	0.75	moderate_subsidence	greenhouse	none
Page Sandstone	Mesozoic	set	\N	2.5	moderate_subsidence	greenhouse	none
Page Sandstone	Mesozoic	set	\N	0.75	moderate_subsidence	greenhouse	none
Page Sandstone	Mesozoic	set	\N	1	moderate_subsidence	greenhouse	none
Page Sandstone	Mesozoic	set	\N	0.75	moderate_subsidence	greenhouse	none
Page Sandstone	Mesozoic	set	\N	12	moderate_subsidence	greenhouse	none
Page Sandstone	Mesozoic	set	\N	6	moderate_subsidence	greenhouse	none
Page Sandstone	Mesozoic	set	\N	6	moderate_subsidence	greenhouse	none
Page Sandstone	Mesozoic	set	\N	1	moderate_subsidence	greenhouse	none
Page Sandstone	Mesozoic	set	\N	3	moderate_subsidence	greenhouse	none
Page Sandstone	Mesozoic	set	\N	0.75	moderate_subsidence	greenhouse	none
Page Sandstone	Mesozoic	set	\N	10	moderate_subsidence	greenhouse	none
Page Sandstone	Mesozoic	set	\N	10	moderate_subsidence	greenhouse	none
Page Sandstone	Mesozoic	set	\N	1	moderate_subsidence	greenhouse	none
Page Sandstone	Mesozoic	set	\N	2.5	moderate_subsidence	greenhouse	none
Page Sandstone	Mesozoic	set	\N	2.5	moderate_subsidence	greenhouse	none
Page Sandstone	Mesozoic	set	\N	2	moderate_subsidence	greenhouse	none
Navajo Sandstone	Mesozoic	set	\N	1	moderate_subsidence	greenhouse	pangaea
Navajo Sandstone	Mesozoic	set	\N	3	moderate_subsidence	greenhouse	pangaea
Navajo Sandstone	Mesozoic	set	\N	5	moderate_subsidence	greenhouse	pangaea
Navajo Sandstone	Mesozoic	set	\N	5	moderate_subsidence	greenhouse	pangaea
Navajo Sandstone	Mesozoic	set	\N	4	moderate_subsidence	greenhouse	pangaea
Navajo Sandstone	Mesozoic	set	\N	3	moderate_subsidence	greenhouse	pangaea
Navajo Sandstone	Mesozoic	set	\N	5	moderate_subsidence	greenhouse	pangaea
Navajo Sandstone	Mesozoic	set	\N	5	moderate_subsidence	greenhouse	pangaea
Navajo Sandstone	Mesozoic	set	\N	3	moderate_subsidence	greenhouse	pangaea
Navajo Sandstone	Mesozoic	set	\N	3	moderate_subsidence	greenhouse	pangaea
Navajo Sandstone	Mesozoic	set	\N	4	moderate_subsidence	greenhouse	pangaea
Navajo Sandstone	Mesozoic	set	\N	4	moderate_subsidence	greenhouse	pangaea
Navajo Sandstone	Mesozoic	set	\N	4	moderate_subsidence	greenhouse	pangaea
Navajo Sandstone	Mesozoic	set	\N	3	moderate_subsidence	greenhouse	pangaea
Navajo Sandstone	Mesozoic	set	\N	3	moderate_subsidence	greenhouse	pangaea
Navajo Sandstone	Mesozoic	set	\N	3	moderate_subsidence	greenhouse	pangaea
Navajo Sandstone	Mesozoic	set	\N	3	moderate_subsidence	greenhouse	pangaea
Navajo Sandstone	Mesozoic	set	\N	12	moderate_subsidence	greenhouse	pangaea
Navajo Sandstone	Mesozoic	set	\N	3	moderate_subsidence	greenhouse	pangaea
Navajo Sandstone	Mesozoic	set	\N	3	moderate_subsidence	greenhouse	pangaea
Chugwater Group	Mesozoic	set	\N	0.75	moderate_subsidence	greenhouse	pangaea
Chugwater Group	Mesozoic	set	\N	1.5	moderate_subsidence	greenhouse	pangaea
Chugwater Group	Mesozoic	set	\N	1.25	moderate_subsidence	greenhouse	pangaea
Chugwater Group	Mesozoic	set	\N	1.5	moderate_subsidence	greenhouse	pangaea
Chugwater Group	Mesozoic	set	\N	1.75	moderate_subsidence	greenhouse	pangaea
Chugwater Group	Mesozoic	set	\N	1.5	moderate_subsidence	greenhouse	pangaea
Chugwater Group	Mesozoic	set	\N	1.75	moderate_subsidence	greenhouse	pangaea
Chugwater Group	Mesozoic	set	\N	2	moderate_subsidence	greenhouse	pangaea
Chugwater Group	Mesozoic	set	\N	1.5	moderate_subsidence	greenhouse	pangaea
Chugwater Group	Mesozoic	set	\N	8	moderate_subsidence	greenhouse	pangaea
Chugwater Group	Mesozoic	set	\N	1	moderate_subsidence	greenhouse	pangaea
Chugwater Group	Mesozoic	set	\N	2.5	moderate_subsidence	greenhouse	pangaea
Chugwater Group	Mesozoic	set	\N	1	moderate_subsidence	greenhouse	pangaea
Chugwater Group	Mesozoic	set	\N	2.5	moderate_subsidence	greenhouse	pangaea
Chugwater Group	Mesozoic	set	\N	2	moderate_subsidence	greenhouse	pangaea
Chugwater Group	Mesozoic	set	\N	2	moderate_subsidence	greenhouse	pangaea
Chugwater Group	Mesozoic	set	\N	1.5	moderate_subsidence	greenhouse	pangaea
Chugwater Group	Mesozoic	set	\N	1.5	moderate_subsidence	greenhouse	pangaea
Chugwater Group	Mesozoic	set	\N	2	moderate_subsidence	greenhouse	pangaea
Chugwater Group	Mesozoic	set	\N	1	moderate_subsidence	greenhouse	pangaea
Chugwater Group	Mesozoic	set	\N	2.5	moderate_subsidence	greenhouse	pangaea
Chugwater Group	Mesozoic	set	\N	0.25	moderate_subsidence	greenhouse	pangaea
Chugwater Group	Mesozoic	set	\N	2.5	moderate_subsidence	greenhouse	pangaea
Chugwater Group	Mesozoic	set	\N	2.5	moderate_subsidence	greenhouse	pangaea
Chugwater Group	Mesozoic	set	\N	1.5	moderate_subsidence	greenhouse	pangaea
Chugwater Group	Mesozoic	set	\N	1	moderate_subsidence	greenhouse	pangaea
Chugwater Group	Mesozoic	set	\N	1.5	moderate_subsidence	greenhouse	pangaea
Sherwood Sandstone	Mesozoic	set	\N	14	moderate_subsidence	icehouse	pangaea
Sherwood Sandstone	Mesozoic	set	\N	3	moderate_subsidence	icehouse	pangaea
Sherwood Sandstone	Mesozoic	set	\N	2	moderate_subsidence	icehouse	pangaea
Sherwood Sandstone	Mesozoic	set	\N	2	moderate_subsidence	icehouse	pangaea
Sherwood Sandstone	Mesozoic	set	\N	4	moderate_subsidence	icehouse	pangaea
Sherwood Sandstone	Mesozoic	set	\N	2	moderate_subsidence	icehouse	pangaea
Sherwood Sandstone	Mesozoic	set	\N	2	moderate_subsidence	icehouse	pangaea
Sherwood Sandstone	Mesozoic	set	\N	2	moderate_subsidence	icehouse	pangaea
Sherwood Sandstone	Mesozoic	set	\N	2	moderate_subsidence	icehouse	pangaea
Sherwood Sandstone	Mesozoic	set	\N	2	moderate_subsidence	icehouse	pangaea
Sherwood Sandstone	Mesozoic	set	\N	2	moderate_subsidence	icehouse	pangaea
Sherwood Sandstone	Mesozoic	set	\N	1	moderate_subsidence	icehouse	pangaea
Sherwood Sandstone	Mesozoic	set	\N	0.5	moderate_subsidence	icehouse	pangaea
Sherwood Sandstone	Mesozoic	set	\N	0.5	moderate_subsidence	icehouse	pangaea
Sherwood Sandstone	Mesozoic	set	\N	1	moderate_subsidence	icehouse	pangaea
Sherwood Sandstone	Mesozoic	set	\N	3	moderate_subsidence	icehouse	pangaea
Sherwood Sandstone	Mesozoic	set	\N	1	moderate_subsidence	icehouse	pangaea
Sherwood Sandstone	Mesozoic	set	\N	1	moderate_subsidence	icehouse	pangaea
Sherwood Sandstone	Mesozoic	set	\N	1	moderate_subsidence	icehouse	pangaea
Sherwood Sandstone	Mesozoic	set	\N	0.5	moderate_subsidence	icehouse	pangaea
Sherwood Sandstone	Mesozoic	set	\N	2	moderate_subsidence	icehouse	pangaea
Sherwood Sandstone	Mesozoic	set	\N	1	moderate_subsidence	icehouse	pangaea
Sherwood Sandstone	Mesozoic	set	\N	3	moderate_subsidence	icehouse	pangaea
Sherwood Sandstone	Mesozoic	set	\N	4	moderate_subsidence	icehouse	pangaea
Sherwood Sandstone	Mesozoic	set	\N	0.5	moderate_subsidence	icehouse	pangaea
Sherwood Sandstone	Mesozoic	set	\N	0.5	moderate_subsidence	icehouse	pangaea
Sherwood Sandstone	Mesozoic	set	\N	1	moderate_subsidence	icehouse	pangaea
Sherwood Sandstone	Mesozoic	set	\N	0.5	moderate_subsidence	icehouse	pangaea
Sherwood Sandstone	Mesozoic	set	\N	0.5	moderate_subsidence	icehouse	pangaea
Entrada Sandstone	Mesozoic	set	\N	12.5	moderate_subsidence	greenhouse	pangaea
Page Sandstone	Mesozoic	set	\N	0.25	moderate_subsidence	greenhouse	none
Page Sandstone	Mesozoic	set	\N	2.5	moderate_subsidence	greenhouse	none
Page Sandstone	Mesozoic	set	\N	5	moderate_subsidence	greenhouse	none
Page Sandstone	Mesozoic	set	\N	5	moderate_subsidence	greenhouse	none
Sergi Formation	Mesozoic	set	\N	11	moderate_subsidence	greenhouse	west_gondwanaland
Sergi Formation	Mesozoic	set	\N	1.5	moderate_subsidence	greenhouse	west_gondwanaland
Sergi Formation	Mesozoic	set	\N	3	moderate_subsidence	greenhouse	west_gondwanaland
Sergi Formation	Mesozoic	set	\N	1.5	moderate_subsidence	greenhouse	west_gondwanaland
Sergi Formation	Mesozoic	set	\N	3	moderate_subsidence	greenhouse	west_gondwanaland
Sergi Formation	Mesozoic	set	\N	6	moderate_subsidence	greenhouse	west_gondwanaland
Sergi Formation	Mesozoic	set	\N	2.5	moderate_subsidence	greenhouse	west_gondwanaland
Sergi Formation	Mesozoic	set	\N	2.5	moderate_subsidence	greenhouse	west_gondwanaland
Sergi Formation	Mesozoic	set	\N	2.5	moderate_subsidence	greenhouse	west_gondwanaland
Sergi Formation	Mesozoic	set	\N	2	moderate_subsidence	greenhouse	west_gondwanaland
Entrada Sandstone	Mesozoic	set	\N	7.5	moderate_subsidence	greenhouse	pangaea
Entrada Sandstone	Mesozoic	set	\N	7.5	moderate_subsidence	greenhouse	pangaea
Entrada Sandstone	Mesozoic	set	\N	15	moderate_subsidence	greenhouse	pangaea
Entrada Sandstone	Mesozoic	set	\N	15	moderate_subsidence	greenhouse	pangaea
Entrada Sandstone	Mesozoic	set	\N	20	moderate_subsidence	greenhouse	pangaea
Entrada Sandstone	Mesozoic	set	\N	4	moderate_subsidence	greenhouse	pangaea
Entrada Sandstone	Mesozoic	set	\N	20	moderate_subsidence	greenhouse	pangaea
Entrada Sandstone	Mesozoic	set	\N	4	moderate_subsidence	greenhouse	pangaea
Page Sandstone	Mesozoic	set	\N	2.5	moderate_subsidence	greenhouse	none
Page Sandstone	Mesozoic	set	\N	5	moderate_subsidence	greenhouse	none
Page Sandstone	Mesozoic	set	\N	3	moderate_subsidence	greenhouse	none
Page Sandstone	Mesozoic	set	\N	0.5	moderate_subsidence	greenhouse	none
Page Sandstone	Mesozoic	set	\N	1	moderate_subsidence	greenhouse	none
Page Sandstone	Mesozoic	set	\N	2.5	moderate_subsidence	greenhouse	none
Page Sandstone	Mesozoic	set	\N	2.5	moderate_subsidence	greenhouse	none
Page Sandstone	Mesozoic	set	\N	10	moderate_subsidence	greenhouse	none
Sergi Formation	Mesozoic	set	\N	5	moderate_subsidence	greenhouse	west_gondwanaland
Sergi Formation	Mesozoic	set	\N	1	moderate_subsidence	greenhouse	west_gondwanaland
Sergi Formation	Mesozoic	set	\N	5	moderate_subsidence	greenhouse	west_gondwanaland
Sergi Formation	Mesozoic	set	\N	2.5	moderate_subsidence	greenhouse	west_gondwanaland
Sergi Formation	Mesozoic	set	\N	9	moderate_subsidence	greenhouse	west_gondwanaland
Entrada Sandstone	Mesozoic	set	\N	15	moderate_subsidence	greenhouse	pangaea
Entrada Sandstone	Mesozoic	set	\N	15	moderate_subsidence	greenhouse	pangaea
Entrada Sandstone	Mesozoic	set	\N	3	moderate_subsidence	greenhouse	pangaea
Entrada Sandstone	Mesozoic	set	\N	7	moderate_subsidence	greenhouse	pangaea
Entrada Sandstone	Mesozoic	set	\N	3	moderate_subsidence	greenhouse	pangaea
Entrada Sandstone	Mesozoic	set	\N	3	moderate_subsidence	greenhouse	pangaea
Entrada Sandstone	Mesozoic	set	\N	5	moderate_subsidence	greenhouse	pangaea
Entrada Sandstone	Mesozoic	set	\N	2	moderate_subsidence	greenhouse	pangaea
Entrada Sandstone	Mesozoic	set	\N	5	moderate_subsidence	greenhouse	pangaea
Entrada Sandstone	Mesozoic	set	\N	1.5	moderate_subsidence	greenhouse	pangaea
Etjo Formation	Mesozoic	\N	\N	40	rapid_subsidence	greenhouse	west_gondwanaland
Etjo Formation	Mesozoic	\N	\N	20	rapid_subsidence	greenhouse	west_gondwanaland
Etjo Formation	Mesozoic	\N	\N	35	rapid_subsidence	greenhouse	west_gondwanaland
Etjo Formation	Mesozoic	\N	\N	65	rapid_subsidence	greenhouse	west_gondwanaland
Etjo Formation	Mesozoic	\N	\N	15	rapid_subsidence	greenhouse	west_gondwanaland
Etjo Formation	Mesozoic	\N	\N	20	rapid_subsidence	greenhouse	west_gondwanaland
Etjo Formation	Mesozoic	\N	\N	27	rapid_subsidence	greenhouse	west_gondwanaland
Etjo Formation	Mesozoic	\N	\N	120	rapid_subsidence	greenhouse	west_gondwanaland
Etjo Formation	Mesozoic	\N	\N	20	rapid_subsidence	greenhouse	west_gondwanaland
Etjo Formation	Mesozoic	\N	fluvial_channel	3	rapid_subsidence	greenhouse	west_gondwanaland
Etjo Formation	Mesozoic	\N	fluvial_channel	4	rapid_subsidence	greenhouse	west_gondwanaland
Etjo Formation	Mesozoic	\N	fluvial_channel	4	rapid_subsidence	greenhouse	west_gondwanaland
Etjo Formation	Mesozoic	\N	igneous	105	rapid_subsidence	greenhouse	west_gondwanaland
Etjo Formation	Mesozoic	\N	igneous	42	rapid_subsidence	greenhouse	west_gondwanaland
Etjo Formation	Mesozoic	\N	igneous	7	rapid_subsidence	greenhouse	west_gondwanaland
Etjo Formation	Mesozoic	\N	igneous	92	rapid_subsidence	greenhouse	west_gondwanaland
Etjo Formation	Mesozoic	\N	igneous	100	rapid_subsidence	greenhouse	west_gondwanaland
Etjo Formation	Mesozoic	\N	igneous	47.5	rapid_subsidence	greenhouse	west_gondwanaland
Etjo Formation	Mesozoic	\N	igneous	60	rapid_subsidence	greenhouse	west_gondwanaland
Etjo Formation	Mesozoic	\N	igneous	2.5	rapid_subsidence	greenhouse	west_gondwanaland
Etjo Formation	Mesozoic	\N	\N	25	rapid_subsidence	greenhouse	west_gondwanaland
Etjo Formation	Mesozoic	\N	\N	10	rapid_subsidence	greenhouse	west_gondwanaland
Etjo Formation	Mesozoic	\N	\N	70	rapid_subsidence	greenhouse	west_gondwanaland
Etjo Formation	Mesozoic	coset	\N	45	rapid_subsidence	greenhouse	west_gondwanaland
Etjo Formation	Mesozoic	coset	\N	22	rapid_subsidence	greenhouse	west_gondwanaland
Etjo Formation	Mesozoic	coset	\N	16	rapid_subsidence	greenhouse	west_gondwanaland
Etjo Formation	Mesozoic	coset	\N	25	rapid_subsidence	greenhouse	west_gondwanaland
Etjo Formation	Mesozoic	coset	\N	27.5	rapid_subsidence	greenhouse	west_gondwanaland
Etjo Formation	Mesozoic	cross-strata_package	\N	30	rapid_subsidence	greenhouse	west_gondwanaland
Etjo Formation	Mesozoic	cross-strata_package	\N	12.5	rapid_subsidence	greenhouse	west_gondwanaland
Etjo Formation	Mesozoic	cross-strata_package	\N	12.5	rapid_subsidence	greenhouse	west_gondwanaland
Etjo Formation	Mesozoic	cross-strata_package	\N	10	rapid_subsidence	greenhouse	west_gondwanaland
Etjo Formation	Mesozoic	cross-strata_package	\N	5	rapid_subsidence	greenhouse	west_gondwanaland
Etjo Formation	Mesozoic	cross-strata_package	\N	5	rapid_subsidence	greenhouse	west_gondwanaland
Etjo Formation	Mesozoic	cross-strata_package	\N	42	rapid_subsidence	greenhouse	west_gondwanaland
Etjo Formation	Mesozoic	cross-strata_package	\N	9	rapid_subsidence	greenhouse	west_gondwanaland
Etjo Formation	Mesozoic	cross-strata_package	\N	12.5	rapid_subsidence	greenhouse	west_gondwanaland
Etjo Formation	Mesozoic	cross-strata_package	\N	6	rapid_subsidence	greenhouse	west_gondwanaland
Etjo Formation	Mesozoic	cross-strata_package	\N	12.5	rapid_subsidence	greenhouse	west_gondwanaland
Etjo Formation	Mesozoic	cross-strata_package	\N	15	rapid_subsidence	greenhouse	west_gondwanaland
Etjo Formation	Mesozoic	cross-strata_package	\N	13	rapid_subsidence	greenhouse	west_gondwanaland
Etjo Formation	Mesozoic	cross-strata_package	\N	13	rapid_subsidence	greenhouse	west_gondwanaland
Etjo Formation	Mesozoic	cross-strata_package	\N	13	rapid_subsidence	greenhouse	west_gondwanaland
Etjo Formation	Mesozoic	cross-strata_package	\N	10	rapid_subsidence	greenhouse	west_gondwanaland
Etjo Formation	Mesozoic	cross-strata_package	\N	10	rapid_subsidence	greenhouse	west_gondwanaland
Etjo Formation	Mesozoic	cross-strata_package	\N	10	rapid_subsidence	greenhouse	west_gondwanaland
Etjo Formation	Mesozoic	cross-strata_package	\N	10	rapid_subsidence	greenhouse	west_gondwanaland
Etjo Formation	Mesozoic	cross-strata_package	\N	10	rapid_subsidence	greenhouse	west_gondwanaland
Etjo Formation	Mesozoic	cross-strata_package	\N	10	rapid_subsidence	greenhouse	west_gondwanaland
Etjo Formation	Mesozoic	cross-strata_package	\N	10	rapid_subsidence	greenhouse	west_gondwanaland
Etjo Formation	Mesozoic	cross-strata_package	\N	40	rapid_subsidence	greenhouse	west_gondwanaland
Etjo Formation	Mesozoic	cross-strata_package	\N	40	rapid_subsidence	greenhouse	west_gondwanaland
Etjo Formation	Mesozoic	cross-strata_package	\N	40	rapid_subsidence	greenhouse	west_gondwanaland
Etjo Formation	Mesozoic	cross-strata_package	\N	8	rapid_subsidence	greenhouse	west_gondwanaland
Etjo Formation	Mesozoic	cross-strata_package	\N	12.5	rapid_subsidence	greenhouse	west_gondwanaland
Etjo Formation	Mesozoic	cross-strata_package	\N	12.5	rapid_subsidence	greenhouse	west_gondwanaland
Etjo Formation	Mesozoic	cross-strata_package	\N	1	rapid_subsidence	greenhouse	west_gondwanaland
Etjo Formation	Mesozoic	cross-strata_package	\N	5	rapid_subsidence	greenhouse	west_gondwanaland
Etjo Formation	Mesozoic	cross-strata_package	\N	42	rapid_subsidence	greenhouse	west_gondwanaland
Etjo Formation	Mesozoic	cross-strata_package	\N	25	rapid_subsidence	greenhouse	west_gondwanaland
Etjo Formation	Mesozoic	cross-strata_package	\N	25	rapid_subsidence	greenhouse	west_gondwanaland
Etjo Formation	Mesozoic	cross-strata_package	\N	35	rapid_subsidence	greenhouse	west_gondwanaland
Etjo Formation	Mesozoic	cross-strata_package	\N	40	rapid_subsidence	greenhouse	west_gondwanaland
Etjo Formation	Mesozoic	cross-strata_package	\N	10	rapid_subsidence	greenhouse	west_gondwanaland
Etjo Formation	Mesozoic	cross-strata_package	\N	10	rapid_subsidence	greenhouse	west_gondwanaland
Etjo Formation	Mesozoic	cross-strata_package	\N	20	rapid_subsidence	greenhouse	west_gondwanaland
Etjo Formation	Mesozoic	cross-strata_package	\N	20	rapid_subsidence	greenhouse	west_gondwanaland
Etjo Formation	Mesozoic	cross-strata_package	\N	7.5	rapid_subsidence	greenhouse	west_gondwanaland
Etjo Formation	Mesozoic	cross-strata_package	\N	5	rapid_subsidence	greenhouse	west_gondwanaland
Etjo Formation	Mesozoic	cross-strata_package	\N	15	rapid_subsidence	greenhouse	west_gondwanaland
Etjo Formation	Mesozoic	cross-strata_package	\N	40	rapid_subsidence	greenhouse	west_gondwanaland
Etjo Formation	Mesozoic	cross-strata_package	\N	15	rapid_subsidence	greenhouse	west_gondwanaland
Etjo Formation	Mesozoic	cross-strata_package	\N	15	rapid_subsidence	greenhouse	west_gondwanaland
Etjo Formation	Mesozoic	cross-strata_package	\N	10	rapid_subsidence	greenhouse	west_gondwanaland
Etjo Formation	Mesozoic	cross-strata_package	\N	5	rapid_subsidence	greenhouse	west_gondwanaland
Etjo Formation	Mesozoic	cross-strata_package	\N	20	rapid_subsidence	greenhouse	west_gondwanaland
Etjo Formation	Mesozoic	cross-strata_package	\N	20	rapid_subsidence	greenhouse	west_gondwanaland
Etjo Formation	Mesozoic	cross-strata_package	\N	10	rapid_subsidence	greenhouse	west_gondwanaland
Etjo Formation	Mesozoic	cross-strata_package	\N	10	rapid_subsidence	greenhouse	west_gondwanaland
Etjo Formation	Mesozoic	cross-strata_package	\N	2.5	rapid_subsidence	greenhouse	west_gondwanaland
Etjo Formation	Mesozoic	cross-strata_package	\N	2.5	rapid_subsidence	greenhouse	west_gondwanaland
Etjo Formation	Mesozoic	cross-strata_package	\N	20	rapid_subsidence	greenhouse	west_gondwanaland
Etjo Formation	Mesozoic	cross-strata_package	\N	35	rapid_subsidence	greenhouse	west_gondwanaland
Etjo Formation	Mesozoic	cross-strata_package	\N	8	rapid_subsidence	greenhouse	west_gondwanaland
Etjo Formation	Mesozoic	cross-strata_package	\N	10	rapid_subsidence	greenhouse	west_gondwanaland
Etjo Formation	Mesozoic	cross-strata_package	\N	4	rapid_subsidence	greenhouse	west_gondwanaland
Etjo Formation	Mesozoic	cross-strata_package	\N	6	rapid_subsidence	greenhouse	west_gondwanaland
Etjo Formation	Mesozoic	cross-strata_package	\N	10	rapid_subsidence	greenhouse	west_gondwanaland
Etjo Formation	Mesozoic	sandsheet_undifferentiated	\N	0.5	rapid_subsidence	greenhouse	west_gondwanaland
Etjo Formation	Mesozoic	sandsheet_undifferentiated	\N	5	rapid_subsidence	greenhouse	west_gondwanaland
Etjo Formation	Mesozoic	set	\N	45	rapid_subsidence	greenhouse	west_gondwanaland
Etjo Formation	Mesozoic	set	\N	3	rapid_subsidence	greenhouse	west_gondwanaland
Etjo Formation	Mesozoic	set	\N	2	rapid_subsidence	greenhouse	west_gondwanaland
Etjo Formation	Mesozoic	set	\N	13	rapid_subsidence	greenhouse	west_gondwanaland
Etjo Formation	Mesozoic	set	\N	13	rapid_subsidence	greenhouse	west_gondwanaland
Etjo Formation	Mesozoic	set	\N	7	rapid_subsidence	greenhouse	west_gondwanaland
Etjo Formation	Mesozoic	set	\N	7	rapid_subsidence	greenhouse	west_gondwanaland
Etjo Formation	Mesozoic	set	\N	7	rapid_subsidence	greenhouse	west_gondwanaland
Etjo Formation	Mesozoic	set	\N	15	rapid_subsidence	greenhouse	west_gondwanaland
Etjo Formation	Mesozoic	set	\N	15	rapid_subsidence	greenhouse	west_gondwanaland
Etjo Formation	Mesozoic	set	\N	15	rapid_subsidence	greenhouse	west_gondwanaland
Etjo Formation	Mesozoic	set	\N	10	rapid_subsidence	greenhouse	west_gondwanaland
Etjo Formation	Mesozoic	set	\N	20	rapid_subsidence	greenhouse	west_gondwanaland
Etjo Formation	Mesozoic	set	\N	8	rapid_subsidence	greenhouse	west_gondwanaland
Etjo Formation	Mesozoic	set	\N	16	rapid_subsidence	greenhouse	west_gondwanaland
Etjo Formation	Mesozoic	set	\N	5	rapid_subsidence	greenhouse	west_gondwanaland
Etjo Formation	Mesozoic	set	\N	8	rapid_subsidence	greenhouse	west_gondwanaland
Etjo Formation	Mesozoic	set	\N	14	rapid_subsidence	greenhouse	west_gondwanaland
Etjo Formation	Mesozoic	set	\N	36	rapid_subsidence	greenhouse	west_gondwanaland
Etjo Formation	Mesozoic	set	\N	15	rapid_subsidence	greenhouse	west_gondwanaland
Etjo Formation	Mesozoic	set	\N	12.5	rapid_subsidence	greenhouse	west_gondwanaland
Etjo Formation	Mesozoic	set	\N	2.5	rapid_subsidence	greenhouse	west_gondwanaland
Etjo Formation	Mesozoic	set	\N	13	rapid_subsidence	greenhouse	west_gondwanaland
Etjo Formation	Mesozoic	set	\N	17	rapid_subsidence	greenhouse	west_gondwanaland
Etjo Formation	Mesozoic	set	\N	7.5	rapid_subsidence	greenhouse	west_gondwanaland
Etjo Formation	Mesozoic	set	\N	7.5	rapid_subsidence	greenhouse	west_gondwanaland
Etjo Formation	Mesozoic	set	\N	10	rapid_subsidence	greenhouse	west_gondwanaland
Etjo Formation	Mesozoic	set	\N	10	rapid_subsidence	greenhouse	west_gondwanaland
Etjo Formation	Mesozoic	set	\N	10	rapid_subsidence	greenhouse	west_gondwanaland
Etjo Formation	Mesozoic	set	\N	20	rapid_subsidence	greenhouse	west_gondwanaland
Etjo Formation	Mesozoic	set	\N	30	rapid_subsidence	greenhouse	west_gondwanaland
Etjo Formation	Mesozoic	set	\N	35	rapid_subsidence	greenhouse	west_gondwanaland
Etjo Formation	Mesozoic	set	\N	40	rapid_subsidence	greenhouse	west_gondwanaland
Etjo Formation	Mesozoic	set	\N	35	rapid_subsidence	greenhouse	west_gondwanaland
Etjo Formation	Mesozoic	set	\N	35	rapid_subsidence	greenhouse	west_gondwanaland
Etjo Formation	Mesozoic	set	\N	20	rapid_subsidence	greenhouse	west_gondwanaland
Etjo Formation	Mesozoic	set	\N	15	rapid_subsidence	greenhouse	west_gondwanaland
Etjo Formation	Mesozoic	set	\N	10	rapid_subsidence	greenhouse	west_gondwanaland
Etjo Formation	Mesozoic	set	\N	5	rapid_subsidence	greenhouse	west_gondwanaland
Etjo Formation	Mesozoic	set	\N	8	rapid_subsidence	greenhouse	west_gondwanaland
Etjo Formation	Mesozoic	set	\N	6	rapid_subsidence	greenhouse	west_gondwanaland
Etjo Formation	Mesozoic	set	\N	6	rapid_subsidence	greenhouse	west_gondwanaland
Etjo Formation	Mesozoic	set	\N	12	rapid_subsidence	greenhouse	west_gondwanaland
Etjo Formation	Mesozoic	set	\N	5.5	rapid_subsidence	greenhouse	west_gondwanaland
Etjo Formation	Mesozoic	set	\N	2	rapid_subsidence	greenhouse	west_gondwanaland
Etjo Formation	Mesozoic	set	\N	2	rapid_subsidence	greenhouse	west_gondwanaland
Etjo Formation	Mesozoic	set	\N	3	rapid_subsidence	greenhouse	west_gondwanaland
Etjo Formation	Mesozoic	set	\N	5	rapid_subsidence	greenhouse	west_gondwanaland
Etjo Formation	Mesozoic	set	\N	1.5	rapid_subsidence	greenhouse	west_gondwanaland
Etjo Formation	Mesozoic	set	\N	2.5	rapid_subsidence	greenhouse	west_gondwanaland
Etjo Formation	Mesozoic	set	\N	7.5	rapid_subsidence	greenhouse	west_gondwanaland
Etjo Formation	Mesozoic	set	\N	2.5	rapid_subsidence	greenhouse	west_gondwanaland
Etjo Formation	Mesozoic	set	\N	2.5	rapid_subsidence	greenhouse	west_gondwanaland
Etjo Formation	Mesozoic	set	\N	12.5	rapid_subsidence	greenhouse	west_gondwanaland
Etjo Formation	Mesozoic	set	\N	7.5	rapid_subsidence	greenhouse	west_gondwanaland
Etjo Formation	Mesozoic	set	\N	5	rapid_subsidence	greenhouse	west_gondwanaland
Etjo Formation	Mesozoic	set	\N	7.5	rapid_subsidence	greenhouse	west_gondwanaland
Etjo Formation	Mesozoic	set	\N	2.5	rapid_subsidence	greenhouse	west_gondwanaland
Etjo Formation	Mesozoic	set	\N	12.5	rapid_subsidence	greenhouse	west_gondwanaland
Etjo Formation	Mesozoic	set	\N	5	rapid_subsidence	greenhouse	west_gondwanaland
Etjo Formation	Mesozoic	set	\N	12.5	rapid_subsidence	greenhouse	west_gondwanaland
Etjo Formation	Mesozoic	set	\N	20	rapid_subsidence	greenhouse	west_gondwanaland
Etjo Formation	Mesozoic	set	\N	20	rapid_subsidence	greenhouse	west_gondwanaland
Etjo Formation	Mesozoic	set	\N	22.5	rapid_subsidence	greenhouse	west_gondwanaland
Etjo Formation	Mesozoic	set	\N	7.5	rapid_subsidence	greenhouse	west_gondwanaland
Etjo Formation	Mesozoic	set	\N	10	rapid_subsidence	greenhouse	west_gondwanaland
Etjo Formation	Mesozoic	set	\N	10	rapid_subsidence	greenhouse	west_gondwanaland
Etjo Formation	Mesozoic	set	\N	20	rapid_subsidence	greenhouse	west_gondwanaland
Etjo Formation	Mesozoic	set	\N	7.5	rapid_subsidence	greenhouse	west_gondwanaland
Etjo Formation	Mesozoic	set	\N	15	rapid_subsidence	greenhouse	west_gondwanaland
Etjo Formation	Mesozoic	set	\N	15	rapid_subsidence	greenhouse	west_gondwanaland
Etjo Formation	Mesozoic	set	\N	7.5	rapid_subsidence	greenhouse	west_gondwanaland
Etjo Formation	Mesozoic	set	\N	15	rapid_subsidence	greenhouse	west_gondwanaland
Etjo Formation	Mesozoic	set	\N	3	rapid_subsidence	greenhouse	west_gondwanaland
Etjo Formation	Mesozoic	set	\N	10	rapid_subsidence	greenhouse	west_gondwanaland
Etjo Formation	Mesozoic	set	\N	2.5	rapid_subsidence	greenhouse	west_gondwanaland
Etjo Formation	Mesozoic	set	\N	20	rapid_subsidence	greenhouse	west_gondwanaland
Etjo Formation	Mesozoic	set	\N	20	rapid_subsidence	greenhouse	west_gondwanaland
Etjo Formation	Mesozoic	set	\N	20	rapid_subsidence	greenhouse	west_gondwanaland
Etjo Formation	Mesozoic	set	\N	20	rapid_subsidence	greenhouse	west_gondwanaland
Etjo Formation	Mesozoic	set	\N	15	rapid_subsidence	greenhouse	west_gondwanaland
Etjo Formation	Mesozoic	set	\N	12.5	rapid_subsidence	greenhouse	west_gondwanaland
Etjo Formation	Mesozoic	set	\N	8	rapid_subsidence	greenhouse	west_gondwanaland
Etjo Formation	Mesozoic	set	\N	2	rapid_subsidence	greenhouse	west_gondwanaland
Etjo Formation	Mesozoic	set	\N	2.5	rapid_subsidence	greenhouse	west_gondwanaland
Etjo Formation	Mesozoic	set	\N	8	rapid_subsidence	greenhouse	west_gondwanaland
Etjo Formation	Mesozoic	set	\N	7.5	rapid_subsidence	greenhouse	west_gondwanaland
Etjo Formation	Mesozoic	set	\N	7.5	rapid_subsidence	greenhouse	west_gondwanaland
Etjo Formation	Mesozoic	set	\N	5	rapid_subsidence	greenhouse	west_gondwanaland
Etjo Formation	Mesozoic	set	\N	12.5	rapid_subsidence	greenhouse	west_gondwanaland
Etjo Formation	Mesozoic	set	\N	5	rapid_subsidence	greenhouse	west_gondwanaland
Etjo Formation	Mesozoic	set	\N	10	rapid_subsidence	greenhouse	west_gondwanaland
Etjo Formation	Mesozoic	set	\N	12.5	rapid_subsidence	greenhouse	west_gondwanaland
Etjo Formation	Mesozoic	set	\N	15	rapid_subsidence	greenhouse	west_gondwanaland
Etjo Formation	Mesozoic	set	\N	5	rapid_subsidence	greenhouse	west_gondwanaland
Etjo Formation	Mesozoic	set	\N	2.5	rapid_subsidence	greenhouse	west_gondwanaland
Etjo Formation	Mesozoic	set	\N	17.5	rapid_subsidence	greenhouse	west_gondwanaland
Etjo Formation	Mesozoic	set	\N	17.5	rapid_subsidence	greenhouse	west_gondwanaland
Etjo Formation	Mesozoic	set	\N	15	rapid_subsidence	greenhouse	west_gondwanaland
Etjo Formation	Mesozoic	set	\N	10	rapid_subsidence	greenhouse	west_gondwanaland
Etjo Formation	Mesozoic	set	\N	10	rapid_subsidence	greenhouse	west_gondwanaland
Etjo Formation	Mesozoic	set	\N	10	rapid_subsidence	greenhouse	west_gondwanaland
Etjo Formation	Mesozoic	set	\N	10	rapid_subsidence	greenhouse	west_gondwanaland
Etjo Formation	Mesozoic	set	\N	10	rapid_subsidence	greenhouse	west_gondwanaland
Etjo Formation	Mesozoic	set	\N	10	rapid_subsidence	greenhouse	west_gondwanaland
Etjo Formation	Mesozoic	set	\N	10	rapid_subsidence	greenhouse	west_gondwanaland
Etjo Formation	Mesozoic	set	\N	8	rapid_subsidence	greenhouse	west_gondwanaland
Etjo Formation	Mesozoic	set	\N	2	rapid_subsidence	greenhouse	west_gondwanaland
Etjo Formation	Mesozoic	set	\N	5	rapid_subsidence	greenhouse	west_gondwanaland
Etjo Formation	Mesozoic	set	\N	12.5	rapid_subsidence	greenhouse	west_gondwanaland
Etjo Formation	Mesozoic	set	\N	7.5	rapid_subsidence	greenhouse	west_gondwanaland
Etjo Formation	Mesozoic	set	\N	4	rapid_subsidence	greenhouse	west_gondwanaland
Etjo Formation	Mesozoic	set	\N	12	rapid_subsidence	greenhouse	west_gondwanaland
Etjo Formation	Mesozoic	set	\N	20	rapid_subsidence	greenhouse	west_gondwanaland
Etjo Formation	Mesozoic	set	\N	10	rapid_subsidence	greenhouse	west_gondwanaland
Etjo Formation	Mesozoic	set	\N	10	rapid_subsidence	greenhouse	west_gondwanaland
Etjo Formation	Mesozoic	set	\N	2	rapid_subsidence	greenhouse	west_gondwanaland
Etjo Formation	Mesozoic	set	\N	2	rapid_subsidence	greenhouse	west_gondwanaland
Etjo Formation	Mesozoic	set	\N	6	rapid_subsidence	greenhouse	west_gondwanaland
Etjo Formation	Mesozoic	set	\N	6	rapid_subsidence	greenhouse	west_gondwanaland
Etjo Formation	Mesozoic	set	\N	8	rapid_subsidence	greenhouse	west_gondwanaland
Etjo Formation	Mesozoic	set	\N	2.5	rapid_subsidence	greenhouse	west_gondwanaland
Etjo Formation	Mesozoic	set	\N	15	rapid_subsidence	greenhouse	west_gondwanaland
Etjo Formation	Mesozoic	set	\N	10	rapid_subsidence	greenhouse	west_gondwanaland
Etjo Formation	Mesozoic	set	\N	8	rapid_subsidence	greenhouse	west_gondwanaland
Etjo Formation	Mesozoic	set	\N	7	rapid_subsidence	greenhouse	west_gondwanaland
Etjo Formation	Mesozoic	set	\N	5	rapid_subsidence	greenhouse	west_gondwanaland
Etjo Formation	Mesozoic	set	\N	12.5	rapid_subsidence	greenhouse	west_gondwanaland
Etjo Formation	Mesozoic	set	\N	11	rapid_subsidence	greenhouse	west_gondwanaland
Etjo Formation	Mesozoic	set	\N	8	rapid_subsidence	greenhouse	west_gondwanaland
Etjo Formation	Mesozoic	set	\N	10	rapid_subsidence	greenhouse	west_gondwanaland
Etjo Formation	Mesozoic	set	\N	12.5	rapid_subsidence	greenhouse	west_gondwanaland
Etjo Formation	Mesozoic	set	\N	40	rapid_subsidence	greenhouse	west_gondwanaland
Etjo Formation	Mesozoic	set	\N	60	rapid_subsidence	greenhouse	west_gondwanaland
Etjo Formation	Mesozoic	set	\N	8	rapid_subsidence	greenhouse	west_gondwanaland
Etjo Formation	Mesozoic	set	\N	15	rapid_subsidence	greenhouse	west_gondwanaland
Etjo Formation	Mesozoic	set	\N	30	rapid_subsidence	greenhouse	west_gondwanaland
Etjo Formation	Mesozoic	set	\N	30	rapid_subsidence	greenhouse	west_gondwanaland
Etjo Formation	Mesozoic	set	\N	8	rapid_subsidence	greenhouse	west_gondwanaland
Etjo Formation	Mesozoic	set	\N	5	rapid_subsidence	greenhouse	west_gondwanaland
Etjo Formation	Mesozoic	set	\N	8	rapid_subsidence	greenhouse	west_gondwanaland
Etjo Formation	Mesozoic	set	\N	55	rapid_subsidence	greenhouse	west_gondwanaland
Etjo Formation	Mesozoic	set	\N	50	rapid_subsidence	greenhouse	west_gondwanaland
Etjo Formation	Mesozoic	set	\N	35	rapid_subsidence	greenhouse	west_gondwanaland
Etjo Formation	Mesozoic	set	\N	55	rapid_subsidence	greenhouse	west_gondwanaland
Etjo Formation	Mesozoic	set	\N	20	rapid_subsidence	greenhouse	west_gondwanaland
Etjo Formation	Mesozoic	set	\N	40	rapid_subsidence	greenhouse	west_gondwanaland
Etjo Formation	Mesozoic	set	\N	50	rapid_subsidence	greenhouse	west_gondwanaland
Etjo Formation	Mesozoic	set	\N	10	rapid_subsidence	greenhouse	west_gondwanaland
Etjo Formation	Mesozoic	set	\N	22.5	rapid_subsidence	greenhouse	west_gondwanaland
Etjo Formation	Mesozoic	set	\N	60	rapid_subsidence	greenhouse	west_gondwanaland
Etjo Formation	Mesozoic	set	\N	2.5	rapid_subsidence	greenhouse	west_gondwanaland
Etjo Formation	Mesozoic	set	\N	35	rapid_subsidence	greenhouse	west_gondwanaland
Unayzah Formation A member	Palaeozoic	\N	\N	0.2	slow_subsidence	icehouse	gondwana
Unayzah Formation A member	Palaeozoic	\N	\N	0.2	slow_subsidence	icehouse	gondwana
Unayzah Formation A member	Palaeozoic	\N	\N	0.4	slow_subsidence	icehouse	gondwana
Unayzah Formation A member	Palaeozoic	\N	\N	0.8	slow_subsidence	icehouse	gondwana
Unayzah Formation A member	Palaeozoic	\N	\N	0.5	slow_subsidence	icehouse	gondwana
Unayzah Formation A member	Palaeozoic	\N	\N	1.25	slow_subsidence	icehouse	gondwana
Unayzah Formation A member	Palaeozoic	\N	\N	0.3	slow_subsidence	icehouse	gondwana
Unayzah Formation A member	Palaeozoic	\N	\N	0.3	slow_subsidence	icehouse	gondwana
Unayzah Formation A member	Palaeozoic	\N	\N	0.75	slow_subsidence	icehouse	gondwana
Unayzah Formation A member	Palaeozoic	\N	\N	0.4	slow_subsidence	icehouse	gondwana
Unayzah Formation A member	Palaeozoic	\N	\N	0.15	slow_subsidence	icehouse	gondwana
Unayzah Formation A member	Palaeozoic	\N	\N	0.5	slow_subsidence	icehouse	gondwana
Unayzah Formation A member	Palaeozoic	\N	\N	0.25	slow_subsidence	icehouse	gondwana
Unayzah Formation A member	Palaeozoic	\N	\N	0.8	slow_subsidence	icehouse	gondwana
Unayzah Formation A member	Palaeozoic	\N	\N	0.25	slow_subsidence	icehouse	gondwana
Unayzah Formation A member	Palaeozoic	\N	\N	0.75	slow_subsidence	icehouse	gondwana
Unayzah Formation A member	Palaeozoic	\N	\N	1.1	slow_subsidence	icehouse	gondwana
Unayzah Formation A member	Palaeozoic	\N	\N	1.2	slow_subsidence	icehouse	gondwana
Unayzah Formation Un-named Middle Member	Palaeozoic	\N	alluvial_sandstone_or_siltstone	8.15	slow_subsidence	icehouse	gondwana
Unayzah Formation Un-named Middle Member	Palaeozoic	\N	alluvial_sandstone_or_siltstone	4	slow_subsidence	icehouse	gondwana
Unayzah Formation Un-named Middle Member	Palaeozoic	\N	alluvial_sandstone_or_siltstone	1	slow_subsidence	icehouse	gondwana
Unayzah Formation Un-named Middle Member	Palaeozoic	\N	fluvial_channel,fluvial_sandstone	0.5	slow_subsidence	icehouse	gondwana
Unayzah Formation Un-named Middle Member	Palaeozoic	\N	fluvial_channel,fluvial_sandstone	0.25	slow_subsidence	icehouse	gondwana
Unayzah Formation Un-named Middle Member	Palaeozoic	\N	fluvial_channel,fluvial_sandstone	1.25	slow_subsidence	icehouse	gondwana
Unayzah Formation Un-named Middle Member	Palaeozoic	\N	fluvial_channel,fluvial_sandstone	0.4	slow_subsidence	icehouse	gondwana
Unayzah Formation Un-named Middle Member	Palaeozoic	\N	fluvial_channel,fluvial_sandstone	0.4	slow_subsidence	icehouse	gondwana
Unayzah Formation Un-named Middle Member	Palaeozoic	\N	fluvial_channel,fluvial_sandstone	1	slow_subsidence	icehouse	gondwana
Unayzah Formation Un-named Middle Member	Palaeozoic	\N	fluvial_channel,fluvial_sandstone	0.5	slow_subsidence	icehouse	gondwana
Unayzah Formation A member	Palaeozoic	\N	marine_siliciclastics	3.8	slow_subsidence	icehouse	gondwana
Unayzah Formation A member	Palaeozoic	\N	marine_siliciclastics	2	slow_subsidence	icehouse	gondwana
Unayzah Formation Un-named Middle Member	Palaeozoic	\N	non-channelized_fluvial_deposits	0.2	slow_subsidence	icehouse	gondwana
Unayzah Formation Un-named Middle Member	Palaeozoic	\N	non-channelized_fluvial_deposits	0.4	slow_subsidence	icehouse	gondwana
Unayzah Formation Un-named Middle Member	Palaeozoic	\N	non-channelized_fluvial_deposits	1.25	slow_subsidence	icehouse	gondwana
Unayzah Formation A member	Palaeozoic	\N	paleosol	1	slow_subsidence	icehouse	gondwana
Unayzah Formation A member	Palaeozoic	\N	paleosol	0.15	slow_subsidence	icehouse	gondwana
Unayzah Formation A member	Palaeozoic	\N	paleosol	0.25	slow_subsidence	icehouse	gondwana
Unayzah Formation A member	Palaeozoic	\N	paleosol	0.4	slow_subsidence	icehouse	gondwana
Unayzah Formation A member	Palaeozoic	\N	paleosol	0.25	slow_subsidence	icehouse	gondwana
Unayzah Formation A member	Palaeozoic	\N	paleosol	0.8	slow_subsidence	icehouse	gondwana
Unayzah Formation A member	Palaeozoic	\N	paleosol	0.4	slow_subsidence	icehouse	gondwana
Unayzah Formation A member	Palaeozoic	\N	paleosol	2	slow_subsidence	icehouse	gondwana
Unayzah Formation A member	Palaeozoic	\N	paleosol	0.4	slow_subsidence	icehouse	gondwana
Unayzah Formation A member	Palaeozoic	\N	paleosol	2	slow_subsidence	icehouse	gondwana
Unayzah Formation A member	Palaeozoic	\N	paleosol	1	slow_subsidence	icehouse	gondwana
Unayzah Formation A member	Palaeozoic	\N	paleosol	0.3	slow_subsidence	icehouse	gondwana
Unayzah Formation A member	Palaeozoic	\N	paleosol	0.5	slow_subsidence	icehouse	gondwana
Unayzah Formation A member	Palaeozoic	\N	paleosol	0.3	slow_subsidence	icehouse	gondwana
Unayzah Formation A member	Palaeozoic	\N	paleosol	0.5	slow_subsidence	icehouse	gondwana
Unayzah Formation A member	Palaeozoic	\N	paleosol	0.4	slow_subsidence	icehouse	gondwana
Unayzah Formation A member	Palaeozoic	\N	paleosol	0.6	slow_subsidence	icehouse	gondwana
Unayzah Formation A member	Palaeozoic	\N	paleosol	0.6	slow_subsidence	icehouse	gondwana
Unayzah Formation A member	Palaeozoic	\N	paleosol	2	slow_subsidence	icehouse	gondwana
Unayzah Formation A member	Palaeozoic	\N	paleosol	0.6	slow_subsidence	icehouse	gondwana
Unayzah Formation A member	Palaeozoic	\N	paleosol	0.75	slow_subsidence	icehouse	gondwana
Unayzah Formation A member	Palaeozoic	\N	paleosol	1.75	slow_subsidence	icehouse	gondwana
Unayzah Formation A member	Palaeozoic	\N	paleosol	2.25	slow_subsidence	icehouse	gondwana
Unayzah Formation A member	Palaeozoic	\N	paleosol	1.9	slow_subsidence	icehouse	gondwana
Unayzah Formation A member	Palaeozoic	\N	paleosol	2.3	slow_subsidence	icehouse	gondwana
Unayzah Formation A member	Palaeozoic	\N	paleosol	2.5	slow_subsidence	icehouse	gondwana
Unayzah Formation A member	Palaeozoic	\N	paleosol	1.2	slow_subsidence	icehouse	gondwana
Unayzah Formation A member	Palaeozoic	\N	paleosol	2.75	slow_subsidence	icehouse	gondwana
Unayzah Formation A member	Palaeozoic	\N	paleosol	0.5	slow_subsidence	icehouse	gondwana
Unayzah Formation A member	Palaeozoic	\N	paleosol	3.5	slow_subsidence	icehouse	gondwana
Unayzah Formation A member	Palaeozoic	\N	paleosol	3	slow_subsidence	icehouse	gondwana
Unayzah Formation A member	Palaeozoic	\N	paleosol	1.2	slow_subsidence	icehouse	gondwana
Unayzah Formation A member	Palaeozoic	\N	paleosol	1.2	slow_subsidence	icehouse	gondwana
Unayzah Formation Un-named Middle Member	Palaeozoic	\N	paleosol	0.3	slow_subsidence	icehouse	gondwana
Unayzah Formation Un-named Middle Member	Palaeozoic	\N	paleosol	0.75	slow_subsidence	icehouse	gondwana
Unayzah Formation Un-named Middle Member	Palaeozoic	\N	paleosol	0.75	slow_subsidence	icehouse	gondwana
Unayzah Formation Un-named Middle Member	Palaeozoic	\N	paleosol	0.5	slow_subsidence	icehouse	gondwana
Unayzah Formation Un-named Middle Member	Palaeozoic	\N	paleosol	1.6	slow_subsidence	icehouse	gondwana
Unayzah Formation Un-named Middle Member	Palaeozoic	\N	paleosol	0.5	slow_subsidence	icehouse	gondwana
Lower Cutler Beds	Palaeozoic	\N	\N	0.5	slow_subsidence	icehouse	pangaea
Lower Cutler Beds	Palaeozoic	\N	\N	0.5	slow_subsidence	icehouse	pangaea
Lower Cutler Beds	Palaeozoic	\N	fluvial_channel,fluvial_sandstone	6	slow_subsidence	icehouse	pangaea
Lower Cutler Beds	Palaeozoic	\N	fluvial_channel,fluvial_sandstone	2	slow_subsidence	icehouse	pangaea
Lower Cutler Beds	Palaeozoic	\N	fluvial_channel,fluvial_sandstone	5	slow_subsidence	icehouse	pangaea
Lower Cutler Beds	Palaeozoic	\N	fluvial_channel,fluvial_sandstone	0.5	slow_subsidence	icehouse	pangaea
Lower Cutler Beds	Palaeozoic	\N	fluvial_channel,fluvial_sandstone	2	slow_subsidence	icehouse	pangaea
Lower Cutler Beds	Palaeozoic	\N	fluvial_channel,fluvial_sandstone	0.5	slow_subsidence	icehouse	pangaea
Lower Cutler Beds	Palaeozoic	\N	fluvial_channel,fluvial_sandstone	4	slow_subsidence	icehouse	pangaea
Lower Cutler Beds	Palaeozoic	\N	fluvial_channel,fluvial_sandstone	3.5	slow_subsidence	icehouse	pangaea
Lower Cutler Beds	Palaeozoic	\N	fluvial_channel,fluvial_sandstone	5	slow_subsidence	icehouse	pangaea
Lower Cutler Beds	Palaeozoic	\N	fluvial_channel,fluvial_sandstone	5	slow_subsidence	icehouse	pangaea
Lower Cutler Beds	Palaeozoic	\N	fluvial_channel,fluvial_sandstone	5	slow_subsidence	icehouse	pangaea
Lower Cutler Beds	Palaeozoic	\N	fluvial_channel,fluvial_sandstone	7.5	slow_subsidence	icehouse	pangaea
Lower Cutler Beds	Palaeozoic	\N	fluvial_channel,fluvial_sandstone	3	slow_subsidence	icehouse	pangaea
Lower Cutler Beds	Palaeozoic	\N	fluvial_channel,fluvial_sandstone	3	slow_subsidence	icehouse	pangaea
Lower Cutler Beds	Palaeozoic	\N	fluvial_mudstone,fluvial_sandstone,non-channelized_fluvial_deposits	6	slow_subsidence	icehouse	pangaea
Lower Cutler Beds	Palaeozoic	\N	fluvial_mudstone,fluvial_sandstone,non-channelized_fluvial_deposits	1.5	slow_subsidence	icehouse	pangaea
Lower Cutler Beds	Palaeozoic	\N	fluvial_mudstone,fluvial_sandstone,non-channelized_fluvial_deposits	1.5	slow_subsidence	icehouse	pangaea
Lower Cutler Beds	Palaeozoic	\N	fluvial_mudstone,fluvial_sandstone,non-channelized_fluvial_deposits	4.5	slow_subsidence	icehouse	pangaea
Lower Cutler Beds	Palaeozoic	\N	fluvial_mudstone,fluvial_sandstone,non-channelized_fluvial_deposits	0.5	slow_subsidence	icehouse	pangaea
Lower Cutler Beds	Palaeozoic	\N	fluvial_mudstone,non-channelized_fluvial_deposits	1	slow_subsidence	icehouse	pangaea
Lower Cutler Beds	Palaeozoic	\N	fluvial_mudstone,non-channelized_fluvial_deposits	3	slow_subsidence	icehouse	pangaea
Lower Cutler Beds	Palaeozoic	\N	fluvial_mudstone,non-channelized_fluvial_deposits	1	slow_subsidence	icehouse	pangaea
Lower Cutler Beds	Palaeozoic	\N	fluvial_mudstone,non-channelized_fluvial_deposits	1.5	slow_subsidence	icehouse	pangaea
Lower Cutler Beds	Palaeozoic	\N	fluvial_mudstone,non-channelized_fluvial_deposits	2	slow_subsidence	icehouse	pangaea
Lower Cutler Beds	Palaeozoic	\N	fluvial_mudstone,non-channelized_fluvial_deposits	1.5	slow_subsidence	icehouse	pangaea
Lower Cutler Beds	Palaeozoic	\N	fluvial_mudstone,non-channelized_fluvial_deposits	3	slow_subsidence	icehouse	pangaea
Lower Cutler Beds	Palaeozoic	\N	fluvial_mudstone,non-channelized_fluvial_deposits	1	slow_subsidence	icehouse	pangaea
Lower Cutler Beds	Palaeozoic	\N	fluvial_mudstone,non-channelized_fluvial_deposits	2	slow_subsidence	icehouse	pangaea
Lower Cutler Beds	Palaeozoic	\N	fluvial_mudstone,non-channelized_fluvial_deposits	2.5	slow_subsidence	icehouse	pangaea
Lower Cutler Beds	Palaeozoic	\N	fluvial_mudstone,non-channelized_fluvial_deposits	3	slow_subsidence	icehouse	pangaea
Lower Cutler Beds	Palaeozoic	\N	fluvial_mudstone,non-channelized_fluvial_deposits	3	slow_subsidence	icehouse	pangaea
Lower Cutler Beds	Palaeozoic	\N	fluvial_mudstone,non-channelized_fluvial_deposits	0.75	slow_subsidence	icehouse	pangaea
Lower Cutler Beds	Palaeozoic	\N	fluvial_mudstone,non-channelized_fluvial_deposits	0.5	slow_subsidence	icehouse	pangaea
Lower Cutler Beds	Palaeozoic	\N	fluvial_mudstone,non-channelized_fluvial_deposits	6	slow_subsidence	icehouse	pangaea
Lower Cutler Beds	Palaeozoic	\N	fluvial_mudstone,non-channelized_fluvial_deposits	0.5	slow_subsidence	icehouse	pangaea
Lower Cutler Beds	Palaeozoic	\N	fluvial_mudstone,non-channelized_fluvial_deposits	0.5	slow_subsidence	icehouse	pangaea
Lower Cutler Beds	Palaeozoic	\N	fluvial_mudstone,non-channelized_fluvial_deposits	0.5	slow_subsidence	icehouse	pangaea
Lower Cutler Beds	Palaeozoic	\N	fluvial_mudstone,non-channelized_fluvial_deposits	1	slow_subsidence	icehouse	pangaea
Lower Cutler Beds	Palaeozoic	\N	fluvial_mudstone,non-channelized_fluvial_deposits	1	slow_subsidence	icehouse	pangaea
Lower Cutler Beds	Palaeozoic	\N	fluvial_mudstone,non-channelized_fluvial_deposits	1.5	slow_subsidence	icehouse	pangaea
Lower Cutler Beds	Palaeozoic	\N	fluvial_mudstone,non-channelized_fluvial_deposits	0.5	slow_subsidence	icehouse	pangaea
Lower Cutler Beds	Palaeozoic	\N	fluvial_mudstone,non-channelized_fluvial_deposits	5.5	slow_subsidence	icehouse	pangaea
Lower Cutler Beds	Palaeozoic	\N	fluvial_mudstone,non-channelized_fluvial_deposits	1	slow_subsidence	icehouse	pangaea
Lower Cutler Beds	Palaeozoic	\N	fluvial_mudstone,non-channelized_fluvial_deposits	0.5	slow_subsidence	icehouse	pangaea
Lower Cutler Beds	Palaeozoic	\N	fluvial_mudstone,non-channelized_fluvial_deposits	2.5	slow_subsidence	icehouse	pangaea
Lower Cutler Beds	Palaeozoic	\N	fluvial_mudstone,non-channelized_fluvial_deposits	1	slow_subsidence	icehouse	pangaea
Lower Cutler Beds	Palaeozoic	\N	fluvial_mudstone,non-channelized_fluvial_deposits	1.5	slow_subsidence	icehouse	pangaea
Lower Cutler Beds	Palaeozoic	\N	fluvial_mudstone,non-channelized_fluvial_deposits	2	slow_subsidence	icehouse	pangaea
Lower Cutler Beds	Palaeozoic	\N	fluvial_sandstone,non-channelized_fluvial_deposits	0.5	slow_subsidence	icehouse	pangaea
Lower Cutler Beds	Palaeozoic	\N	marine_carbonates	1.5	slow_subsidence	icehouse	pangaea
Lower Cutler Beds	Palaeozoic	\N	marine_carbonates	2	slow_subsidence	icehouse	pangaea
Lower Cutler Beds	Palaeozoic	\N	marine_carbonates	1.5	slow_subsidence	icehouse	pangaea
Lower Cutler Beds	Palaeozoic	\N	marine_carbonates	1.5	slow_subsidence	icehouse	pangaea
Lower Cutler Beds	Palaeozoic	\N	marine_carbonates	2	slow_subsidence	icehouse	pangaea
Lower Cutler Beds	Palaeozoic	\N	marine_carbonates	4.5	slow_subsidence	icehouse	pangaea
Lower Cutler Beds	Palaeozoic	\N	marine_carbonates	2	slow_subsidence	icehouse	pangaea
Lower Cutler Beds	Palaeozoic	\N	marine_carbonates	2	slow_subsidence	icehouse	pangaea
Lower Cutler Beds	Palaeozoic	\N	marine_carbonates	3	slow_subsidence	icehouse	pangaea
Lower Cutler Beds	Palaeozoic	\N	marine_carbonates	1	slow_subsidence	icehouse	pangaea
Lower Cutler Beds	Palaeozoic	\N	marine_carbonates	2	slow_subsidence	icehouse	pangaea
Lower Cutler Beds	Palaeozoic	\N	marine_carbonates	1.5	slow_subsidence	icehouse	pangaea
Lower Cutler Beds	Palaeozoic	\N	marine_carbonates	0.25	slow_subsidence	icehouse	pangaea
Lower Cutler Beds	Palaeozoic	\N	marine_carbonates	3	slow_subsidence	icehouse	pangaea
Lower Cutler Beds	Palaeozoic	\N	marine_carbonates	2	slow_subsidence	icehouse	pangaea
Lower Cutler Beds	Palaeozoic	\N	marine_carbonates	2	slow_subsidence	icehouse	pangaea
Lower Cutler Beds	Palaeozoic	\N	marine_carbonates	2	slow_subsidence	icehouse	pangaea
Lower Cutler Beds	Palaeozoic	\N	marine_carbonates	4	slow_subsidence	icehouse	pangaea
Lower Cutler Beds	Palaeozoic	\N	marine_siliciclastics	0.5	slow_subsidence	icehouse	pangaea
Lower Cutler Beds	Palaeozoic	\N	marine_siliciclastics	2	slow_subsidence	icehouse	pangaea
Lower Cutler Beds	Palaeozoic	\N	marine_siliciclastics	1.5	slow_subsidence	icehouse	pangaea
Lower Cutler Beds	Palaeozoic	\N	marine_siliciclastics	2	slow_subsidence	icehouse	pangaea
Lower Cutler Beds	Palaeozoic	\N	marine_siliciclastics	2	slow_subsidence	icehouse	pangaea
Lower Cutler Beds	Palaeozoic	\N	marine_siliciclastics	5	slow_subsidence	icehouse	pangaea
Lower Cutler Beds	Palaeozoic	\N	marine_siliciclastics	2	slow_subsidence	icehouse	pangaea
Lower Cutler Beds	Palaeozoic	\N	marine_siliciclastics	6	slow_subsidence	icehouse	pangaea
Lower Cutler Beds	Palaeozoic	\N	marine_siliciclastics	2	slow_subsidence	icehouse	pangaea
Lower Cutler Beds	Palaeozoic	\N	marine_siliciclastics	2	slow_subsidence	icehouse	pangaea
Lower Cutler Beds	Palaeozoic	\N	marine_siliciclastics	1	slow_subsidence	icehouse	pangaea
Lower Cutler Beds	Palaeozoic	\N	marine_siliciclastics	1.5	slow_subsidence	icehouse	pangaea
Lower Cutler Beds	Palaeozoic	\N	marine_siliciclastics	1.5	slow_subsidence	icehouse	pangaea
Caldeirao Member	Palaeozoic	coset	\N	2	slow_subsidence	icehouse	gondwana
Caldeirao Member	Palaeozoic	coset	\N	2.75	slow_subsidence	icehouse	gondwana
Caldeirao Member	Palaeozoic	coset	\N	8	slow_subsidence	icehouse	gondwana
Caldeirao Member	Palaeozoic	coset	\N	10	slow_subsidence	icehouse	gondwana
Lower Cutler Beds	Palaeozoic	coset	\N	5.5	slow_subsidence	icehouse	pangaea
Lower Cutler Beds	Palaeozoic	coset	\N	5.5	slow_subsidence	icehouse	pangaea
Lower Cutler Beds	Palaeozoic	coset	\N	5	slow_subsidence	icehouse	pangaea
Lower Cutler Beds	Palaeozoic	coset	\N	3.5	slow_subsidence	icehouse	pangaea
Lower Cutler Beds	Palaeozoic	coset	\N	4	slow_subsidence	icehouse	pangaea
Lower Cutler Beds	Palaeozoic	coset	\N	7	slow_subsidence	icehouse	pangaea
Lower Cutler Beds	Palaeozoic	coset	\N	7	slow_subsidence	icehouse	pangaea
Lower Cutler Beds	Palaeozoic	coset	\N	4	slow_subsidence	icehouse	pangaea
Lower Cutler Beds	Palaeozoic	coset	\N	4	slow_subsidence	icehouse	pangaea
Lower Cutler Beds	Palaeozoic	coset	\N	6	slow_subsidence	icehouse	pangaea
Lower Cutler Beds	Palaeozoic	coset	\N	4.5	slow_subsidence	icehouse	pangaea
Lower Cutler Beds	Palaeozoic	coset	\N	4.5	slow_subsidence	icehouse	pangaea
Lower Cutler Beds	Palaeozoic	coset	\N	1	slow_subsidence	icehouse	pangaea
Lower Cutler Beds	Palaeozoic	coset	\N	2	slow_subsidence	icehouse	pangaea
Lower Cutler Beds	Palaeozoic	coset	\N	3	slow_subsidence	icehouse	pangaea
Lower Cutler Beds	Palaeozoic	coset	\N	1	slow_subsidence	icehouse	pangaea
Lower Cutler Beds	Palaeozoic	coset	\N	2	slow_subsidence	icehouse	pangaea
Lower Cutler Beds	Palaeozoic	coset	\N	5	slow_subsidence	icehouse	pangaea
Lower Cutler Beds	Palaeozoic	coset	\N	5	slow_subsidence	icehouse	pangaea
Caldeirao Member	Palaeozoic	coset	\N	4	slow_subsidence	icehouse	gondwana
Caldeirao Member	Palaeozoic	coset	\N	1	slow_subsidence	icehouse	gondwana
Caldeirao Member	Palaeozoic	cross-strata_package	\N	1.3	slow_subsidence	icehouse	gondwana
Caldeirao Member	Palaeozoic	cross-strata_package	\N	1.1	slow_subsidence	icehouse	gondwana
Caldeirao Member	Palaeozoic	cross-strata_package	\N	1.1	slow_subsidence	icehouse	gondwana
Caldeirao Member	Palaeozoic	cross-strata_package	\N	1.1	slow_subsidence	icehouse	gondwana
Caldeirao Member	Palaeozoic	cross-strata_package	\N	1.1	slow_subsidence	icehouse	gondwana
Caldeirao Member	Palaeozoic	cross-strata_package	\N	1	slow_subsidence	icehouse	gondwana
Caldeirao Member	Palaeozoic	cross-strata_package	\N	1.5	slow_subsidence	icehouse	gondwana
Caldeirao Member	Palaeozoic	cross-strata_package	\N	0.75	slow_subsidence	icehouse	gondwana
Caldeirao Member	Palaeozoic	cross-strata_package	\N	3	slow_subsidence	icehouse	gondwana
Caldeirao Member	Palaeozoic	cross-strata_package	\N	0.5	slow_subsidence	icehouse	gondwana
Caldeirao Member	Palaeozoic	cross-strata_package	\N	0.75	slow_subsidence	icehouse	gondwana
Caldeirao Member	Palaeozoic	cross-strata_package	\N	2	slow_subsidence	icehouse	gondwana
Caldeirao Member	Palaeozoic	cross-strata_package	\N	2	slow_subsidence	icehouse	gondwana
Caldeirao Member	Palaeozoic	cross-strata_package	\N	2	slow_subsidence	icehouse	gondwana
Caldeirao Member	Palaeozoic	cross-strata_package	\N	2	slow_subsidence	icehouse	gondwana
Caldeirao Member	Palaeozoic	cross-strata_package	\N	2	slow_subsidence	icehouse	gondwana
Caldeirao Member	Palaeozoic	cross-strata_package	\N	2	slow_subsidence	icehouse	gondwana
Caldeirao Member	Palaeozoic	cross-strata_package	\N	2	slow_subsidence	icehouse	gondwana
Caldeirao Member	Palaeozoic	cross-strata_package	\N	1.5	slow_subsidence	icehouse	gondwana
Caldeirao Member	Palaeozoic	cross-strata_package	\N	1.5	slow_subsidence	icehouse	gondwana
Caldeirao Member	Palaeozoic	cross-strata_package	\N	1.5	slow_subsidence	icehouse	gondwana
Caldeirao Member	Palaeozoic	cross-strata_package	\N	1	slow_subsidence	icehouse	gondwana
Caldeirao Member	Palaeozoic	cross-strata_package	\N	1	slow_subsidence	icehouse	gondwana
Caldeirao Member	Palaeozoic	cross-strata_package	\N	1.1	slow_subsidence	icehouse	gondwana
Caldeirao Member	Palaeozoic	cross-strata_package	\N	1.1	slow_subsidence	icehouse	gondwana
Caldeirao Member	Palaeozoic	cross-strata_package	\N	1	slow_subsidence	icehouse	gondwana
Caldeirao Member	Palaeozoic	cross-strata_package	\N	1	slow_subsidence	icehouse	gondwana
Caldeirao Member	Palaeozoic	cross-strata_package	\N	1	slow_subsidence	icehouse	gondwana
Caldeirao Member	Palaeozoic	cross-strata_package	\N	1	slow_subsidence	icehouse	gondwana
Caldeirao Member	Palaeozoic	cross-strata_package	\N	1	slow_subsidence	icehouse	gondwana
Caldeirao Member	Palaeozoic	cross-strata_package	\N	1	slow_subsidence	icehouse	gondwana
Caldeirao Member	Palaeozoic	cross-strata_package	\N	1	slow_subsidence	icehouse	gondwana
Caldeirao Member	Palaeozoic	cross-strata_package	\N	1	slow_subsidence	icehouse	gondwana
Caldeirao Member	Palaeozoic	cross-strata_package	\N	0.5	slow_subsidence	icehouse	gondwana
Caldeirao Member	Palaeozoic	cross-strata_package	\N	1	slow_subsidence	icehouse	gondwana
Caldeirao Member	Palaeozoic	cross-strata_package	\N	0.5	slow_subsidence	icehouse	gondwana
Caldeirao Member	Palaeozoic	cross-strata_package	\N	0.4	slow_subsidence	icehouse	gondwana
Caldeirao Member	Palaeozoic	cross-strata_package	\N	1.25	slow_subsidence	icehouse	gondwana
Caldeirao Member	Palaeozoic	cross-strata_package	\N	0.75	slow_subsidence	icehouse	gondwana
Caldeirao Member	Palaeozoic	cross-strata_package	\N	0.75	slow_subsidence	icehouse	gondwana
Caldeirao Member	Palaeozoic	cross-strata_package	\N	1.1	slow_subsidence	icehouse	gondwana
Caldeirao Member	Palaeozoic	cross-strata_package	\N	0.9	slow_subsidence	icehouse	gondwana
Caldeirao Member	Palaeozoic	cross-strata_package	\N	0.75	slow_subsidence	icehouse	gondwana
Caldeirao Member	Palaeozoic	cross-strata_package	\N	1.1	slow_subsidence	icehouse	gondwana
Unayzah Formation A member	Palaeozoic	interdune_damp	\N	0.25	slow_subsidence	icehouse	gondwana
Unayzah Formation A member	Palaeozoic	interdune_damp	\N	1	slow_subsidence	icehouse	gondwana
Unayzah Formation A member	Palaeozoic	interdune_damp	\N	2.2	slow_subsidence	icehouse	gondwana
Unayzah Formation A member	Palaeozoic	interdune_damp	\N	1	slow_subsidence	icehouse	gondwana
Unayzah Formation A member	Palaeozoic	interdune_damp	\N	3.5	slow_subsidence	icehouse	gondwana
Unayzah Formation A member	Palaeozoic	interdune_damp	\N	0.25	slow_subsidence	icehouse	gondwana
Unayzah Formation A member	Palaeozoic	interdune_damp	\N	0.15	slow_subsidence	icehouse	gondwana
Unayzah Formation A member	Palaeozoic	interdune_damp	\N	0.8	slow_subsidence	icehouse	gondwana
Unayzah Formation A member	Palaeozoic	interdune_damp	\N	0.25	slow_subsidence	icehouse	gondwana
Unayzah Formation A member	Palaeozoic	interdune_damp	\N	0.1	slow_subsidence	icehouse	gondwana
Unayzah Formation A member	Palaeozoic	interdune_damp	\N	0.2	slow_subsidence	icehouse	gondwana
Unayzah Formation A member	Palaeozoic	interdune_damp	\N	0.1	slow_subsidence	icehouse	gondwana
Unayzah Formation A member	Palaeozoic	interdune_damp	\N	1.1	slow_subsidence	icehouse	gondwana
Unayzah Formation A member	Palaeozoic	interdune_damp	\N	0.75	slow_subsidence	icehouse	gondwana
Unayzah Formation A member	Palaeozoic	interdune_damp	\N	0.75	slow_subsidence	icehouse	gondwana
Unayzah Formation A member	Palaeozoic	interdune_damp	\N	0.5	slow_subsidence	icehouse	gondwana
Unayzah Formation A member	Palaeozoic	interdune_damp	\N	0.6	slow_subsidence	icehouse	gondwana
Unayzah Formation A member	Palaeozoic	interdune_damp	\N	0.3	slow_subsidence	icehouse	gondwana
Unayzah Formation A member	Palaeozoic	interdune_damp	\N	0.15	slow_subsidence	icehouse	gondwana
Unayzah Formation A member	Palaeozoic	interdune_damp	\N	0.15	slow_subsidence	icehouse	gondwana
Unayzah Formation A member	Palaeozoic	interdune_damp	\N	0.15	slow_subsidence	icehouse	gondwana
Unayzah Formation A member	Palaeozoic	interdune_damp	\N	0.25	slow_subsidence	icehouse	gondwana
Unayzah Formation A member	Palaeozoic	interdune_damp	\N	0.75	slow_subsidence	icehouse	gondwana
Unayzah Formation A member	Palaeozoic	interdune_damp	\N	0.3	slow_subsidence	icehouse	gondwana
Unayzah Formation A member	Palaeozoic	interdune_damp	\N	0.15	slow_subsidence	icehouse	gondwana
Unayzah Formation A member	Palaeozoic	interdune_damp	\N	0.5	slow_subsidence	icehouse	gondwana
Unayzah Formation A member	Palaeozoic	interdune_damp	\N	0.5	slow_subsidence	icehouse	gondwana
Unayzah Formation A member	Palaeozoic	interdune_damp	\N	0.6	slow_subsidence	icehouse	gondwana
Unayzah Formation Un-named Middle Member	Palaeozoic	interdune_damp	\N	0.6	slow_subsidence	icehouse	gondwana
Unayzah Formation Un-named Middle Member	Palaeozoic	interdune_damp	\N	0.4	slow_subsidence	icehouse	gondwana
Unayzah Formation Un-named Middle Member	Palaeozoic	interdune_damp	\N	0.2	slow_subsidence	icehouse	gondwana
Caldeirao Member	Palaeozoic	interdune_damp	\N	0.2	slow_subsidence	icehouse	gondwana
Caldeirao Member	Palaeozoic	interdune_damp	\N	0.5	slow_subsidence	icehouse	gondwana
Caldeirao Member	Palaeozoic	interdune_damp	\N	0.25	slow_subsidence	icehouse	gondwana
Caldeirao Member	Palaeozoic	interdune_damp	\N	0.5	slow_subsidence	icehouse	gondwana
Caldeirao Member	Palaeozoic	interdune_damp	\N	0.4	slow_subsidence	icehouse	gondwana
Caldeirao Member	Palaeozoic	interdune_damp	\N	0.25	slow_subsidence	icehouse	gondwana
Caldeirao Member	Palaeozoic	interdune_damp	\N	3	slow_subsidence	icehouse	gondwana
Lower Cutler Beds	Palaeozoic	interdune_damp	\N	0.5	slow_subsidence	icehouse	pangaea
Lower Cutler Beds	Palaeozoic	interdune_damp	\N	0.75	slow_subsidence	icehouse	pangaea
Lower Cutler Beds	Palaeozoic	interdune_damp	\N	0.25	slow_subsidence	icehouse	pangaea
Lower Cutler Beds	Palaeozoic	interdune_damp	\N	0.5	slow_subsidence	icehouse	pangaea
Caldeirao Member	Palaeozoic	interdune_damp	\N	4	slow_subsidence	icehouse	gondwana
Unayzah Formation A member	Palaeozoic	interdune_wet	\N	0.5	slow_subsidence	icehouse	gondwana
Unayzah Formation A member	Palaeozoic	interdune_wet	\N	1	slow_subsidence	icehouse	gondwana
Unayzah Formation A member	Palaeozoic	interdune_wet	\N	0.8	slow_subsidence	icehouse	gondwana
Unayzah Formation A member	Palaeozoic	interdune_wet	\N	0.25	slow_subsidence	icehouse	gondwana
Unayzah Formation A member	Palaeozoic	interdune_wet	\N	0.6	slow_subsidence	icehouse	gondwana
Unayzah Formation A member	Palaeozoic	interdune_wet	\N	1.2	slow_subsidence	icehouse	gondwana
Unayzah Formation A member	Palaeozoic	interdune_wet	\N	1.3	slow_subsidence	icehouse	gondwana
Unayzah Formation A member	Palaeozoic	interdune_wet	\N	0.25	slow_subsidence	icehouse	gondwana
Unayzah Formation A member	Palaeozoic	interdune_wet	\N	0.25	slow_subsidence	icehouse	gondwana
Unayzah Formation A member	Palaeozoic	interdune_wet	\N	0.1	slow_subsidence	icehouse	gondwana
Unayzah Formation A member	Palaeozoic	interdune_wet	\N	0.1	slow_subsidence	icehouse	gondwana
Unayzah Formation A member	Palaeozoic	interdune_wet	\N	0.8	slow_subsidence	icehouse	gondwana
Unayzah Formation A member	Palaeozoic	interdune_wet	\N	0.8	slow_subsidence	icehouse	gondwana
Unayzah Formation A member	Palaeozoic	interdune_wet	\N	0.5	slow_subsidence	icehouse	gondwana
Unayzah Formation A member	Palaeozoic	interdune_wet	\N	1.2	slow_subsidence	icehouse	gondwana
Unayzah Formation A member	Palaeozoic	interdune_wet	\N	1.25	slow_subsidence	icehouse	gondwana
Unayzah Formation A member	Palaeozoic	interdune_wet	\N	0.15	slow_subsidence	icehouse	gondwana
Unayzah Formation A member	Palaeozoic	interdune_wet	\N	0.15	slow_subsidence	icehouse	gondwana
Unayzah Formation A member	Palaeozoic	sandsheet_undifferentiated	\N	0.1	slow_subsidence	icehouse	gondwana
Unayzah Formation A member	Palaeozoic	sandsheet_undifferentiated	\N	0.4	slow_subsidence	icehouse	gondwana
Unayzah Formation A member	Palaeozoic	sandsheet_undifferentiated	\N	0.4	slow_subsidence	icehouse	gondwana
Unayzah Formation A member	Palaeozoic	sandsheet_undifferentiated	\N	0.5	slow_subsidence	icehouse	gondwana
Unayzah Formation A member	Palaeozoic	sandsheet_undifferentiated	\N	0.25	slow_subsidence	icehouse	gondwana
Unayzah Formation A member	Palaeozoic	sandsheet_undifferentiated	\N	0.4	slow_subsidence	icehouse	gondwana
Unayzah Formation A member	Palaeozoic	sandsheet_undifferentiated	\N	0.1	slow_subsidence	icehouse	gondwana
Unayzah Formation A member	Palaeozoic	sandsheet_undifferentiated	\N	0.3	slow_subsidence	icehouse	gondwana
Unayzah Formation A member	Palaeozoic	sandsheet_undifferentiated	\N	0.25	slow_subsidence	icehouse	gondwana
Unayzah Formation A member	Palaeozoic	sandsheet_undifferentiated	\N	0.25	slow_subsidence	icehouse	gondwana
Unayzah Formation A member	Palaeozoic	sandsheet_undifferentiated	\N	0.25	slow_subsidence	icehouse	gondwana
Unayzah Formation A member	Palaeozoic	sandsheet_undifferentiated	\N	0.25	slow_subsidence	icehouse	gondwana
Unayzah Formation A member	Palaeozoic	sandsheet_undifferentiated	\N	0.25	slow_subsidence	icehouse	gondwana
Unayzah Formation A member	Palaeozoic	sandsheet_undifferentiated	\N	0.15	slow_subsidence	icehouse	gondwana
Unayzah Formation A member	Palaeozoic	sandsheet_undifferentiated	\N	1.1	slow_subsidence	icehouse	gondwana
Unayzah Formation Un-named Middle Member	Palaeozoic	sandsheet_undifferentiated	\N	0.2	slow_subsidence	icehouse	gondwana
Unayzah Formation Un-named Middle Member	Palaeozoic	sandsheet_undifferentiated	\N	0.5	slow_subsidence	icehouse	gondwana
Unayzah Formation Un-named Middle Member	Palaeozoic	sandsheet_undifferentiated	\N	1	slow_subsidence	icehouse	gondwana
Unayzah Formation Un-named Middle Member	Palaeozoic	sandsheet_undifferentiated	\N	1.25	slow_subsidence	icehouse	gondwana
Unayzah Formation Un-named Middle Member	Palaeozoic	sandsheet_undifferentiated	\N	0.25	slow_subsidence	icehouse	gondwana
Unayzah Formation Un-named Middle Member	Palaeozoic	sandsheet_undifferentiated	\N	1.5	slow_subsidence	icehouse	gondwana
Unayzah Formation Un-named Middle Member	Palaeozoic	sandsheet_undifferentiated	\N	1.25	slow_subsidence	icehouse	gondwana
Unayzah Formation Un-named Middle Member	Palaeozoic	sandsheet_undifferentiated	\N	0.8	slow_subsidence	icehouse	gondwana
Unayzah Formation Un-named Middle Member	Palaeozoic	sandsheet_undifferentiated	\N	0.2	slow_subsidence	icehouse	gondwana
Unayzah Formation Un-named Middle Member	Palaeozoic	sandsheet_undifferentiated	\N	0.2	slow_subsidence	icehouse	gondwana
Unayzah Formation Un-named Middle Member	Palaeozoic	sandsheet_undifferentiated	\N	0.2	slow_subsidence	icehouse	gondwana
Unayzah Formation Un-named Middle Member	Palaeozoic	sandsheet_undifferentiated	\N	1	slow_subsidence	icehouse	gondwana
Unayzah Formation Un-named Middle Member	Palaeozoic	sandsheet_undifferentiated	\N	0.6	slow_subsidence	icehouse	gondwana
Unayzah Formation Un-named Middle Member	Palaeozoic	sandsheet_undifferentiated	\N	1	slow_subsidence	icehouse	gondwana
Unayzah Formation Un-named Middle Member	Palaeozoic	sandsheet_undifferentiated	\N	0.2	slow_subsidence	icehouse	gondwana
Unayzah Formation Un-named Middle Member	Palaeozoic	sandsheet_undifferentiated	\N	0.2	slow_subsidence	icehouse	gondwana
Unayzah Formation Un-named Middle Member	Palaeozoic	sandsheet_undifferentiated	\N	1.5	slow_subsidence	icehouse	gondwana
Unayzah Formation Un-named Middle Member	Palaeozoic	sandsheet_undifferentiated	\N	0.2	slow_subsidence	icehouse	gondwana
Unayzah Formation Un-named Middle Member	Palaeozoic	sandsheet_undifferentiated	\N	1	slow_subsidence	icehouse	gondwana
Lower Cutler Beds	Palaeozoic	sandsheet_undifferentiated	\N	1	slow_subsidence	icehouse	pangaea
Lower Cutler Beds	Palaeozoic	sandsheet_undifferentiated	\N	1	slow_subsidence	icehouse	pangaea
Lower Cutler Beds	Palaeozoic	sandsheet_undifferentiated	\N	1.5	slow_subsidence	icehouse	pangaea
Lower Cutler Beds	Palaeozoic	sandsheet_undifferentiated	\N	1.5	slow_subsidence	icehouse	pangaea
Lower Cutler Beds	Palaeozoic	sandsheet_undifferentiated	\N	1.5	slow_subsidence	icehouse	pangaea
Lower Cutler Beds	Palaeozoic	sandsheet_undifferentiated	\N	0.25	slow_subsidence	icehouse	pangaea
Lower Cutler Beds	Palaeozoic	sandsheet_undifferentiated	\N	1	slow_subsidence	icehouse	pangaea
Lower Cutler Beds	Palaeozoic	sandsheet_undifferentiated	\N	0.75	slow_subsidence	icehouse	pangaea
Lower Cutler Beds	Palaeozoic	sandsheet_undifferentiated	\N	1	slow_subsidence	icehouse	pangaea
Lower Cutler Beds	Palaeozoic	sandsheet_undifferentiated	\N	0.25	slow_subsidence	icehouse	pangaea
Lower Cutler Beds	Palaeozoic	sandsheet_undifferentiated	\N	1.5	slow_subsidence	icehouse	pangaea
Lower Cutler Beds	Palaeozoic	sandsheet_undifferentiated	\N	0.5	slow_subsidence	icehouse	pangaea
Lower Cutler Beds	Palaeozoic	sandsheet_undifferentiated,interdune_damp	\N	0.75	slow_subsidence	icehouse	pangaea
Unayzah Formation A member	Palaeozoic	set	\N	0.4	slow_subsidence	icehouse	gondwana
Unayzah Formation A member	Palaeozoic	set	\N	0.6	slow_subsidence	icehouse	gondwana
Unayzah Formation A member	Palaeozoic	set	\N	3.5	slow_subsidence	icehouse	gondwana
Unayzah Formation A member	Palaeozoic	set	\N	0.5	slow_subsidence	icehouse	gondwana
Unayzah Formation A member	Palaeozoic	set	\N	3	slow_subsidence	icehouse	gondwana
Unayzah Formation A member	Palaeozoic	set	\N	0.75	slow_subsidence	icehouse	gondwana
Unayzah Formation A member	Palaeozoic	set	\N	1.25	slow_subsidence	icehouse	gondwana
Unayzah Formation A member	Palaeozoic	set	\N	0.5	slow_subsidence	icehouse	gondwana
Unayzah Formation A member	Palaeozoic	set	\N	1.6	slow_subsidence	icehouse	gondwana
Unayzah Formation A member	Palaeozoic	set	\N	1.2	slow_subsidence	icehouse	gondwana
Unayzah Formation A member	Palaeozoic	set	\N	0.75	slow_subsidence	icehouse	gondwana
Unayzah Formation A member	Palaeozoic	set	\N	0.75	slow_subsidence	icehouse	gondwana
[truncated: 1,872 more rows]

## Sheet: G49474
Cosgrove, G.I.E., Colombera, L., and Mountney, N.P., 2021, Eolian stratigraphic record of environmental change through geological time: Geology, https://doi.org/10.1130/G49474.1
